# Supplementary material for: Dependence of 1H-NMR T1 relaxation time of trimethylglycine betaine deep eutectic solvents on the molar composition and on the presence of water
Source: Royal Society of Chemistry journal article supplement (doi:10.1039/d2ra08082f), 2023-01-01

## Dependence of $^1\text{H-NMR } T_1$ relaxation time of trimethylglycine betaine deep eutectic solvents on the molar composition and on the presence of water

Chiara Allegretti,<sup>a</sup> Paola D'Arrigo,<sup>\*,a,b</sup> Francesco G. Gatti,<sup>\*,a</sup> Letizia A. M. Rossato<sup>a</sup> and Eleonora Ruffini<sup>a</sup>

<sup>a</sup> Department of Chemistry, Materials and Chemical Engineering "Giulio Natta", Politecnico di Milano, P.zza Leonardo da Vinci 32, Milano, 20133, Italy

E-mail paola.darrigo@polimi.it, francesco.gatti@polimi.it

<sup>b</sup> Istituto di Scienze e Tecnologie Chimiche "Giulio Natta" - Consiglio Nazionale delle Ricerche (SCITEC-CNR), Via Luigi Mancinelli 7, Milano, 20131, Italy

### Summary

|                                                                                              |         |
|----------------------------------------------------------------------------------------------|---------|
| 1. Determination of DES molar fraction and water content by $^1\text{H-NMR}$ .....           | S2      |
| 1.1. $^1\text{H-NMR}$ spectra of Gb/D1 mixtures.....                                         | S2-S5   |
| 1.2. $^1\text{H-NMR}$ spectra of Gb/D1 mixtures + 3 eq $\text{H}_2\text{O}$ .....            | S6-S9   |
| 1.3. $^1\text{H-NMR}$ spectra of Gb/D1 mixtures + 6 eq $\text{H}_2\text{O}$ .....            | S9-S12  |
| 1.4. $^1\text{H-NMR}$ spectra of Gb/D2 mixtures.....                                         | S12-S15 |
| 1.5. $^1\text{H-NMR}$ spectra of Gb/D3 mixtures.....                                         | S16-S19 |
| 2. Copies of $T_1$ exponential fitting by inversion recovery technique of -OH signal.....    | S19     |
| 2.1. $T_1$ exponential fitting of Gb/D1 mixtures.....                                        | S19-S23 |
| 2.2. $T_1$ exponential fitting of Gb/D1 mixtures + 3 eq $\text{H}_2\text{O}$ .....           | S23-S26 |
| 2.3. $T_1$ exponential fitting of Gb/D1 mixtures + 6 eq $\text{H}_2\text{O}$ .....           | S27-S30 |
| 2.4. $T_1$ exponential fitting of Gb/D2 mixtures.....                                        | S30-S33 |
| 2.5. $T_1$ exponential fitting of Gb/D3 mixtures.....                                        | S33-S36 |
| 3. Copies of $T_1$ exponential fitting by inversion recovery technique of other signals..... | S37     |
| 3.1. $T_1$ exponential fitting of Gb/D1 mixtures.....                                        | S37     |
| 3.2. $T_1$ exponential fitting of Gb/D1 mixtures + 3 eq $\text{H}_2\text{O}$ .....           | S38     |
| 3.3. $T_1$ exponential fitting of Gb/D1 mixtures + 6 eq $\text{H}_2\text{O}$ .....           | S39     |
| 3.4. $T_1$ exponential fitting of Gb/D2 mixtures.....                                        | S40-S41 |
| 3.5. $T_1$ exponential fitting of Gb/D3 mixtures.....                                        | S41-S42 |
| 4. Copies of DSC plotting of Gb/D1 mixtures.....                                             | S43-S44 |

## 1. Determination of DES molar fraction and water content by $^1\text{H-NMR}$

### 1.1. $^1\text{H-NMR}$ spectra of Gb/D1 mixtures

#### Gb/D1 1:2.44

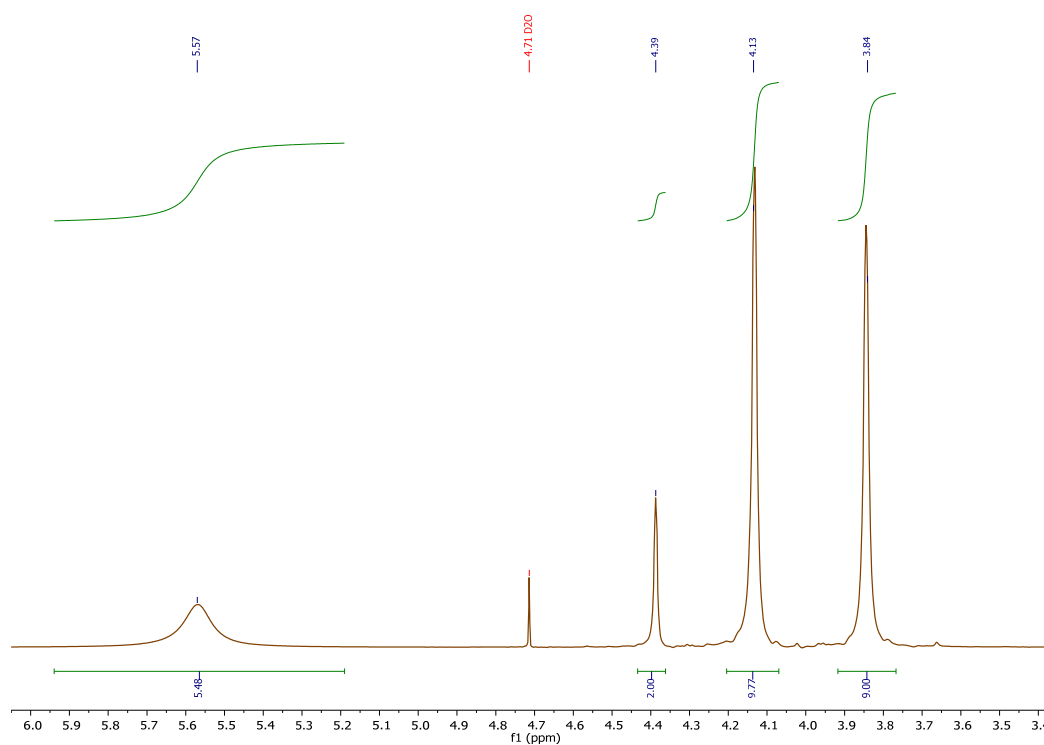

#### Gb/D1 1:2.73

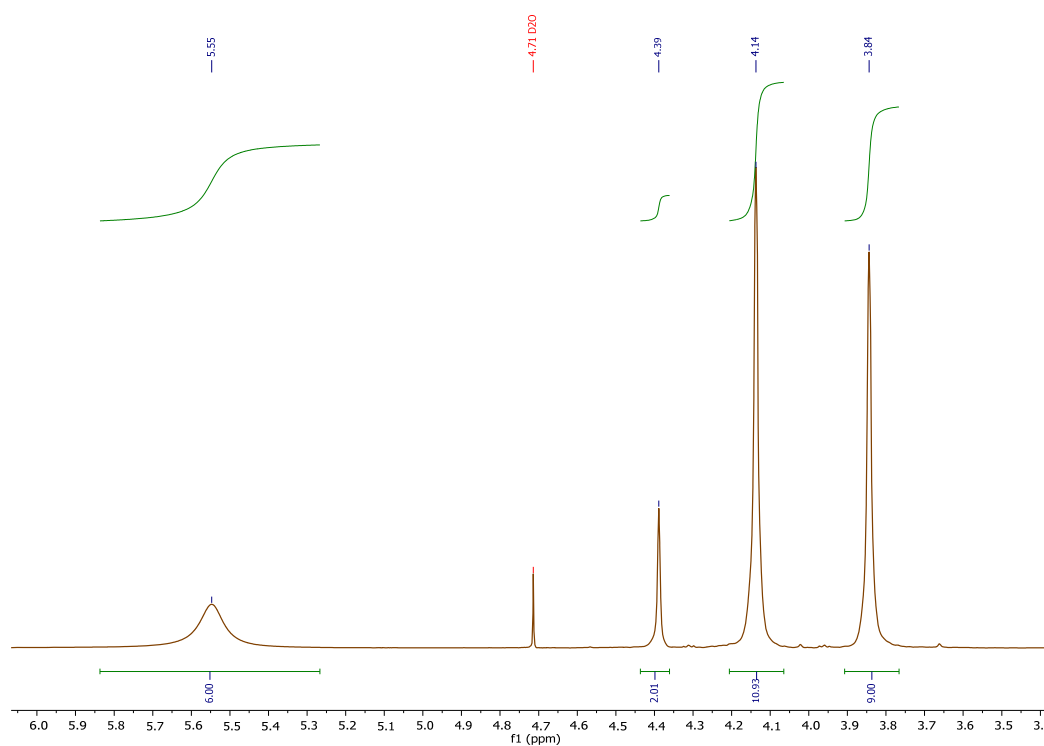

## Gb/D1 1:2.85

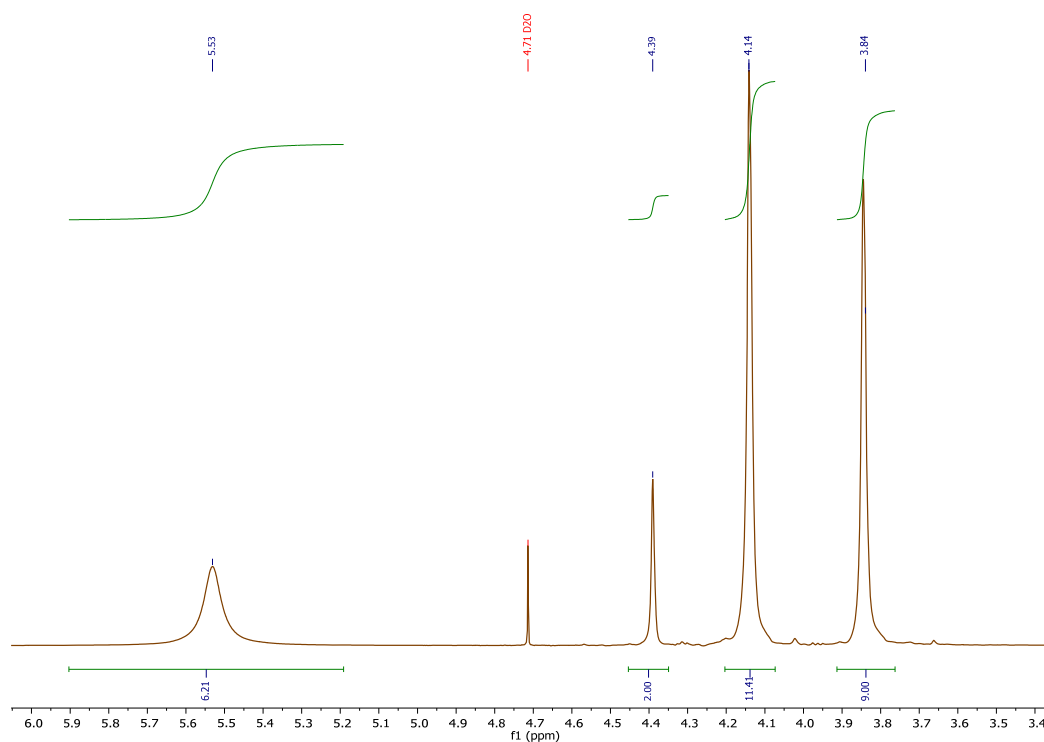

<sup>1</sup>H-NMR (400 MHz):  $\delta$ : 5.53 (s, OH, 2.85\*2H), 4.39 (s, CH<sub>2</sub>, 2H), 4.14 (s, CH<sub>2</sub>-OH, 2.85\*4H), 3.84 (s, NME<sub>3</sub>, 9H)

## Gb/D1 1:3.18

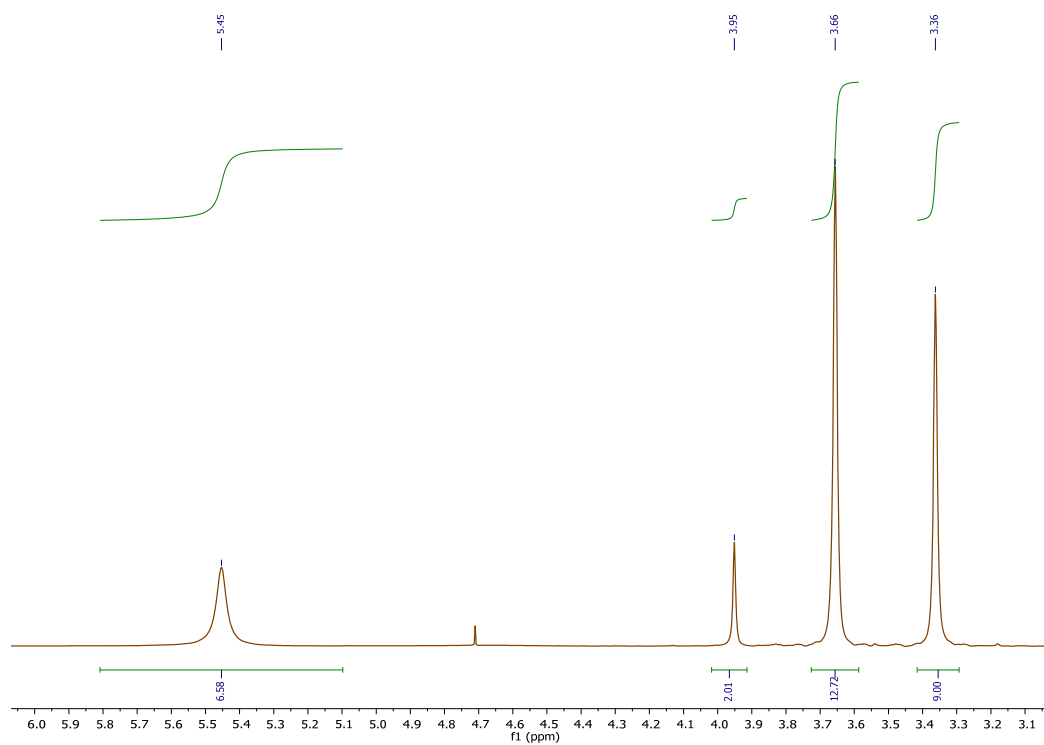

<sup>1</sup>H-NMR (400 MHz):  $\delta$ : 5.45 (s, OH, 3.18\*2H), 3.95 (s, CH<sub>2</sub>, 2H), 3.66 (s, CH<sub>2</sub>-OH, 3.18\*4H), 3.36 (s, NME<sub>3</sub>, 9H)

**Gb/D1 1:3.91**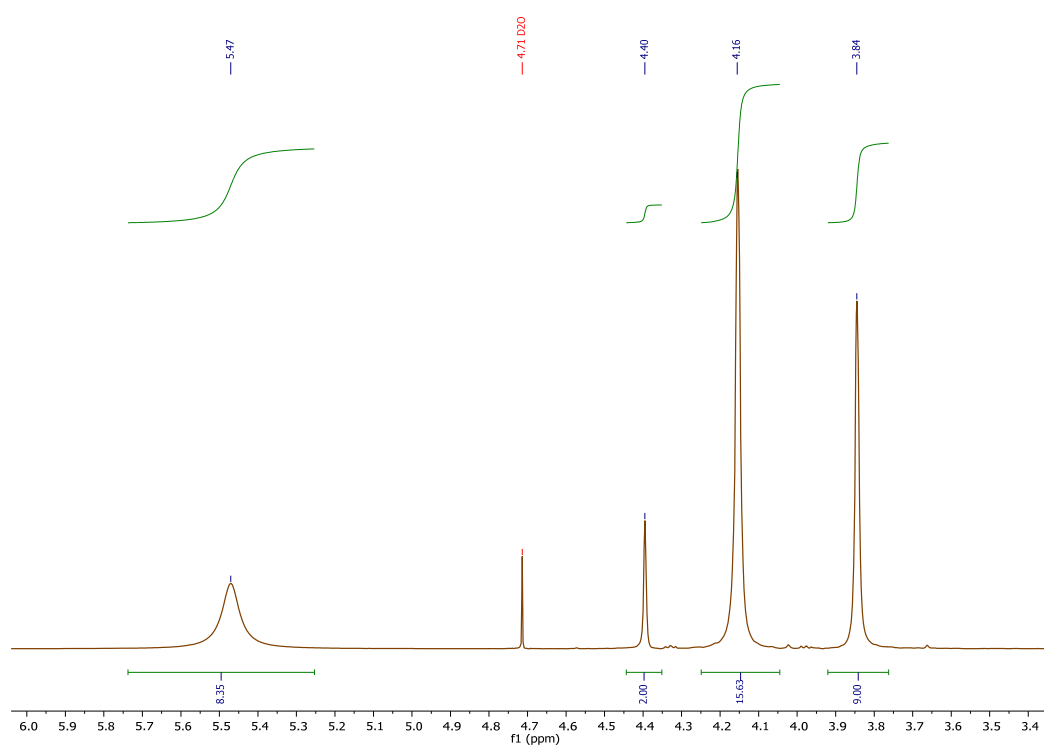

<sup>1</sup>H-NMR (400 MHz):  $\delta$ : 5.47 (s, OH, 3.91\*2H), 4.40 (s, CH<sub>2</sub>, 2H), 4.16 (s, CH<sub>2</sub>-OH, 3.91\*4H), 3.84 (s, NME<sub>3</sub>, 9H)

**Gb/D1 1:4.85**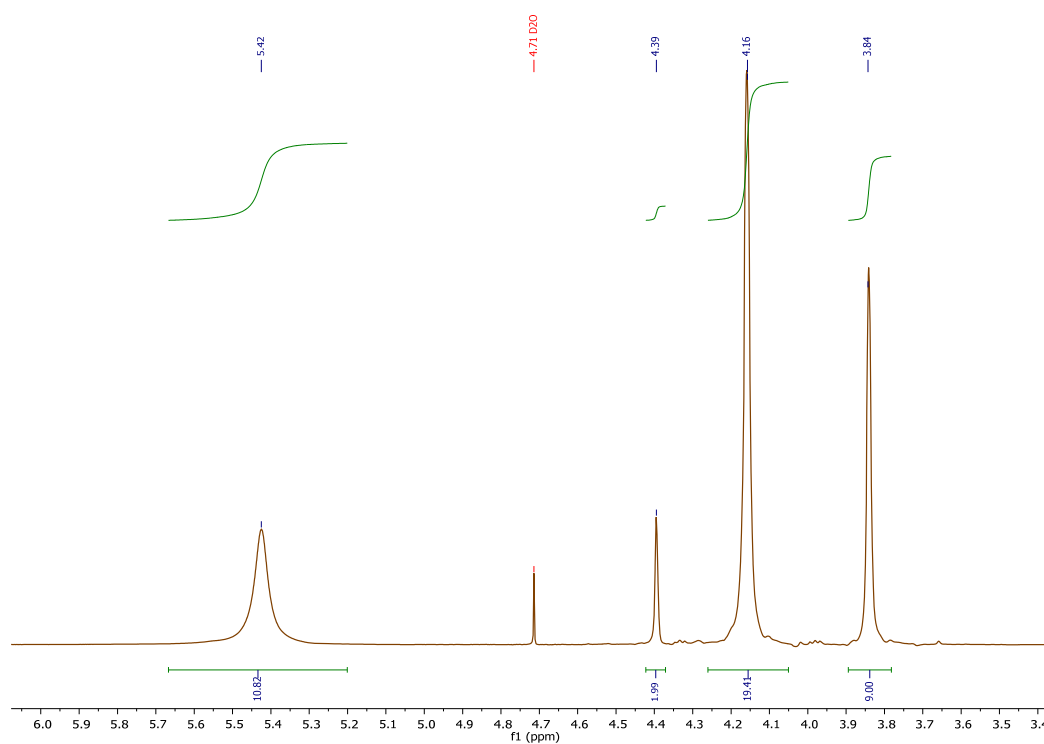

<sup>1</sup>H-NMR (400 MHz):  $\delta$ : 5.42 (s, OH, 4.85\*2H), 4.39 (s, CH<sub>2</sub>, 2H), 4.16 (s, CH<sub>2</sub>-OH, 4.85\*4H), 3.84 (s, NME<sub>3</sub>, 9H)

## Gb/D1 1:8.65

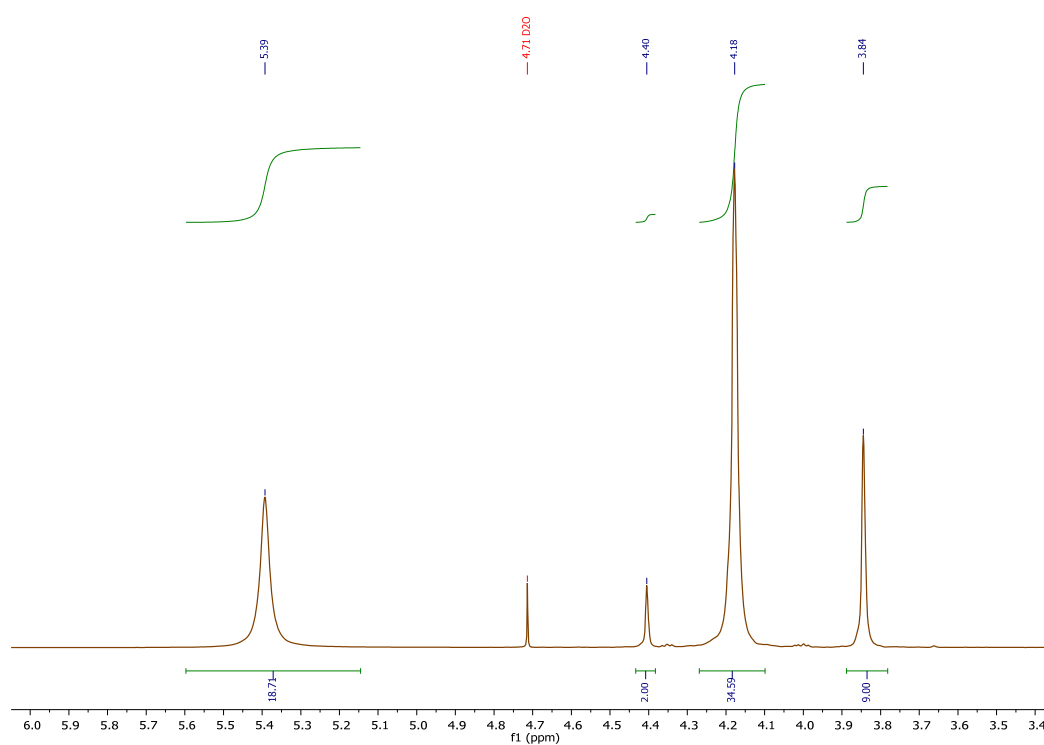

<sup>1</sup>H-NMR (400 MHz):  $\delta$ : 5.39 (s, OH, 8.65\*2H), 4.40 (s, CH<sub>2</sub>, 2H), 4.18 (s, CH<sub>2</sub>-OH, 8.65\*4H), 3.84 (s, NME<sub>3</sub>, 9H)

## D1

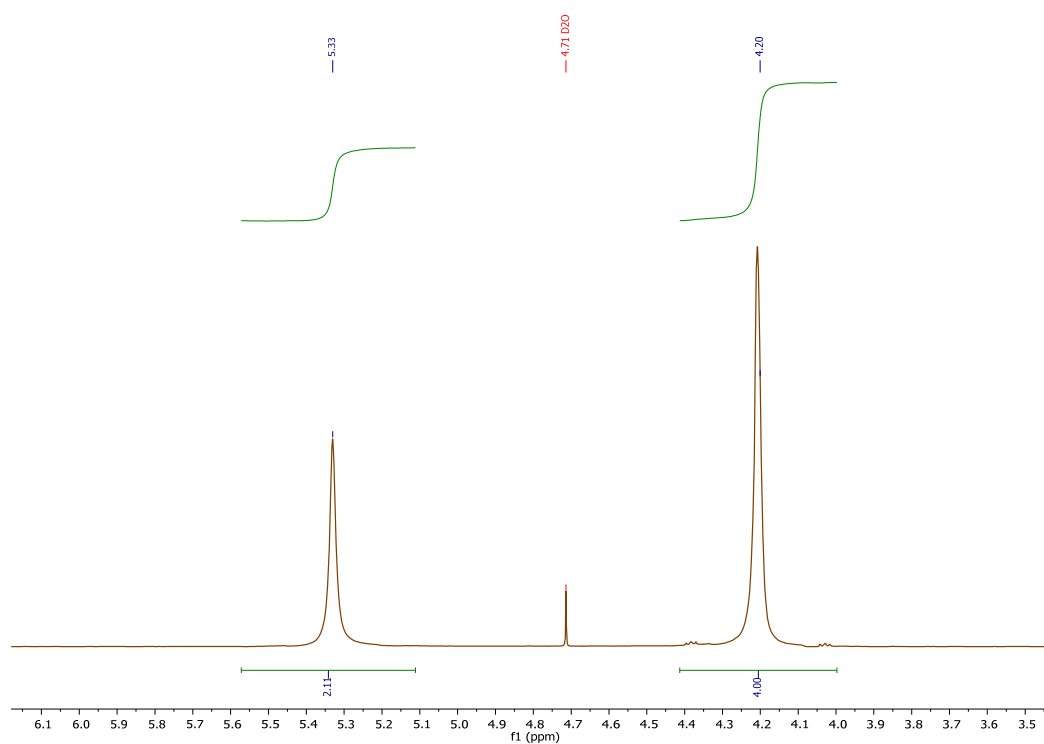

<sup>1</sup>H-NMR (400 MHz):  $\delta$ : 5.33 (s, OH), 4.20 (s, CH<sub>2</sub>-OH, 4H)

1.2.  $^1\text{H-NMR}$  spectra of Gb/D1 mixtures + 3 eq  $\text{H}_2\text{O}$ Gb/D1 1:2.01 + 3 eq  $\text{H}_2\text{O}$ 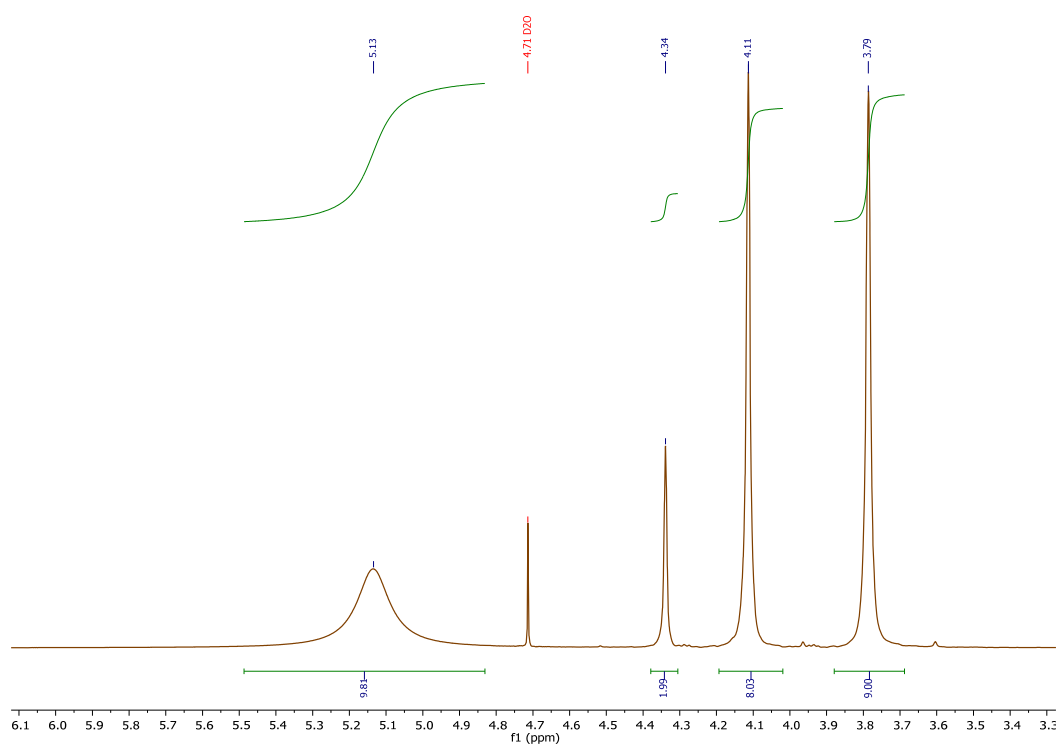

$^1\text{H-NMR}$  (400 MHz):  $\delta$ : 5.13 (s, OH, 2.01\*2H), 4.34 (s,  $\text{CH}_2$ , 2H), 4.11 (s,  $\text{CH}_2\text{-OH}$ , 2.01\*4H), 3.79 (s,  $\text{NME}_3$ , 9H)

Gb/D1 1:2.49 + 3 eq  $\text{H}_2\text{O}$ 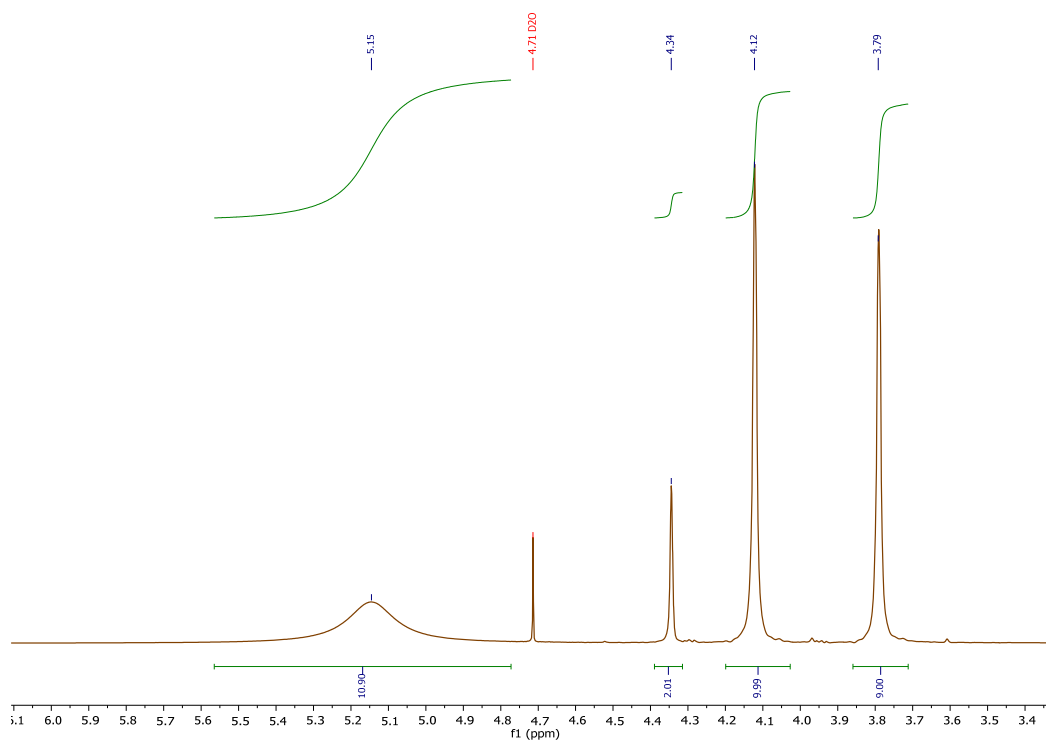

$^1\text{H-NMR}$  (400 MHz):  $\delta$ : 5.15 (s, OH, 2.49\*2H), 4.34 (s,  $\text{CH}_2$ , 2H), 4.12 (s,  $\text{CH}_2\text{-OH}$ , 2.49\*4H), 3.79 (s,  $\text{NME}_3$ , 9H)

**Gb/D1 1:2.85 + 3 eq H<sub>2</sub>O**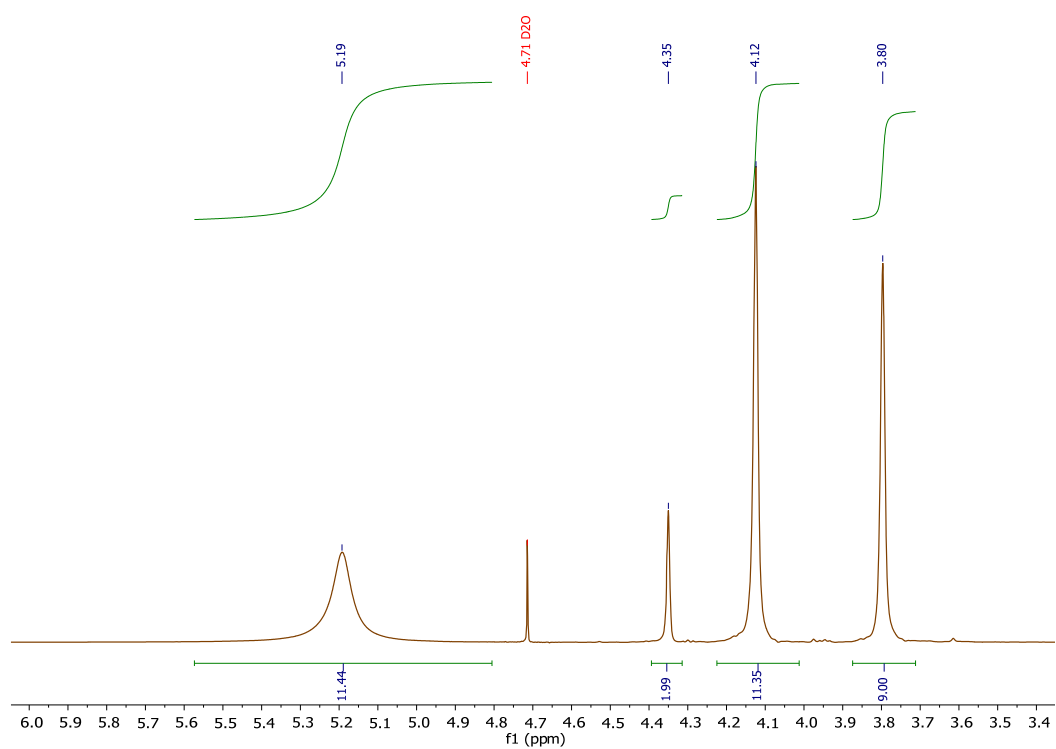**Gb/D1 1:3.11 + 3 eq H<sub>2</sub>O**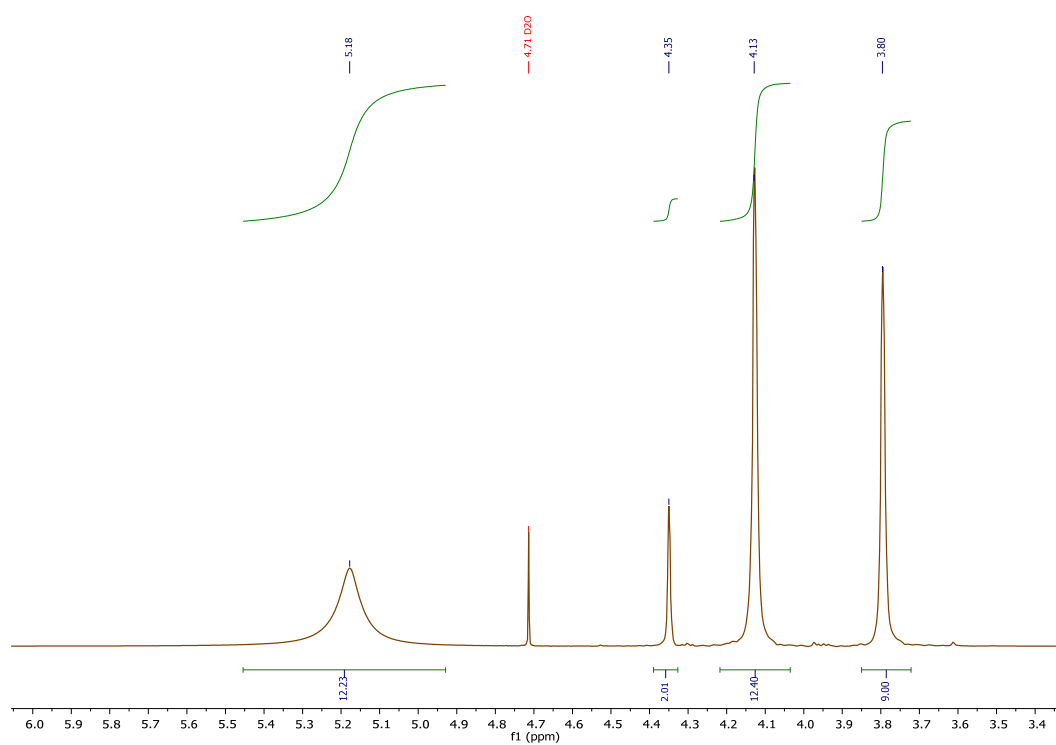

Gb/D1 1:5.76 + 3 eq H<sub>2</sub>O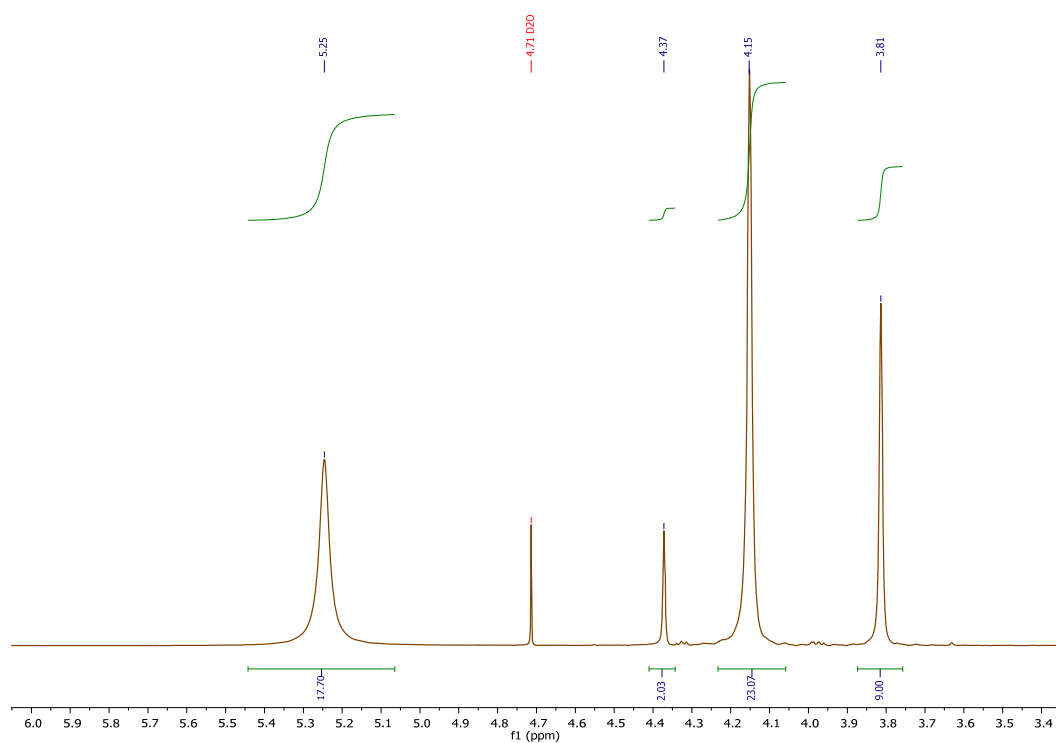

<sup>1</sup>H-NMR (400 MHz):  $\delta$ : 5.25 (s, OH, 5.76\*2H), 4.37 (s, CH<sub>2</sub>, 2H), 4.15 (s, CH<sub>2</sub>-OH, 5.76\*4H), 3.81 (s, NME<sub>3</sub>, 9H)

Gb/D1 1:11.81 + 3 eq H<sub>2</sub>O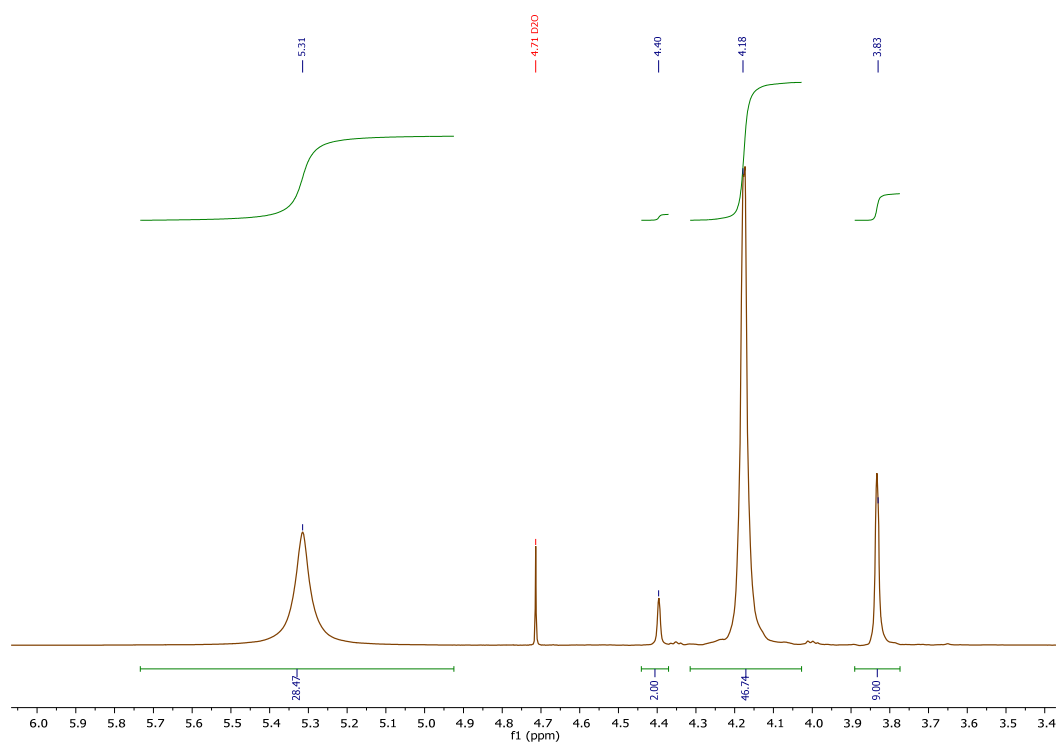

<sup>1</sup>H-NMR (400 MHz):  $\delta$ : 5.31 (s, OH, 11.81\*2H), 4.40 (s, CH<sub>2</sub>, 2H), 4.18 (s, CH<sub>2</sub>-OH, 11.81\*4H), 3.83 (s, NME<sub>3</sub>, 9H)



**Gb/D1 1:18.99 + 3 eq H<sub>2</sub>O**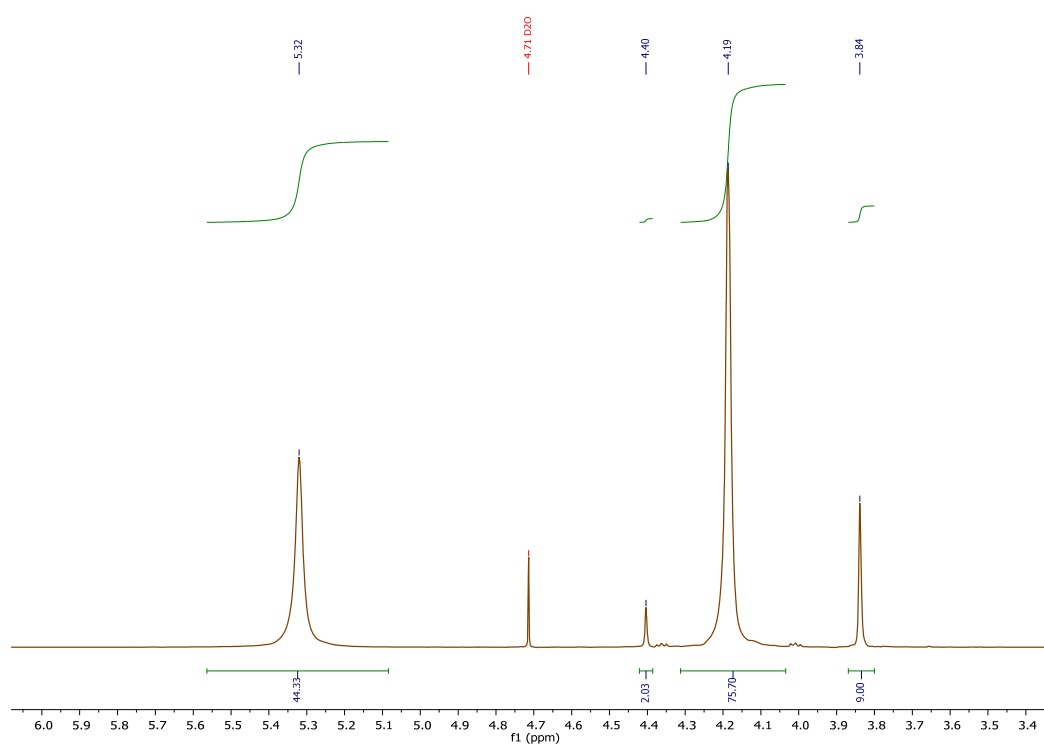

<sup>1</sup>H-NMR (400 MHz):  $\delta$ : 5.32 (s, OH, 18.99\*2H), 4.40 (s, CH<sub>2</sub>, 2H), 4.19 (s, CH<sub>2</sub>-OH, 18.99\*4H), 3.84 (s, NME<sub>3</sub>, 9H)

**1.3. <sup>1</sup>H-NMR spectra of Gb/D1 mixtures + 6 eq H<sub>2</sub>O****Gb/D1 1:1.52 + 6 eq H<sub>2</sub>O**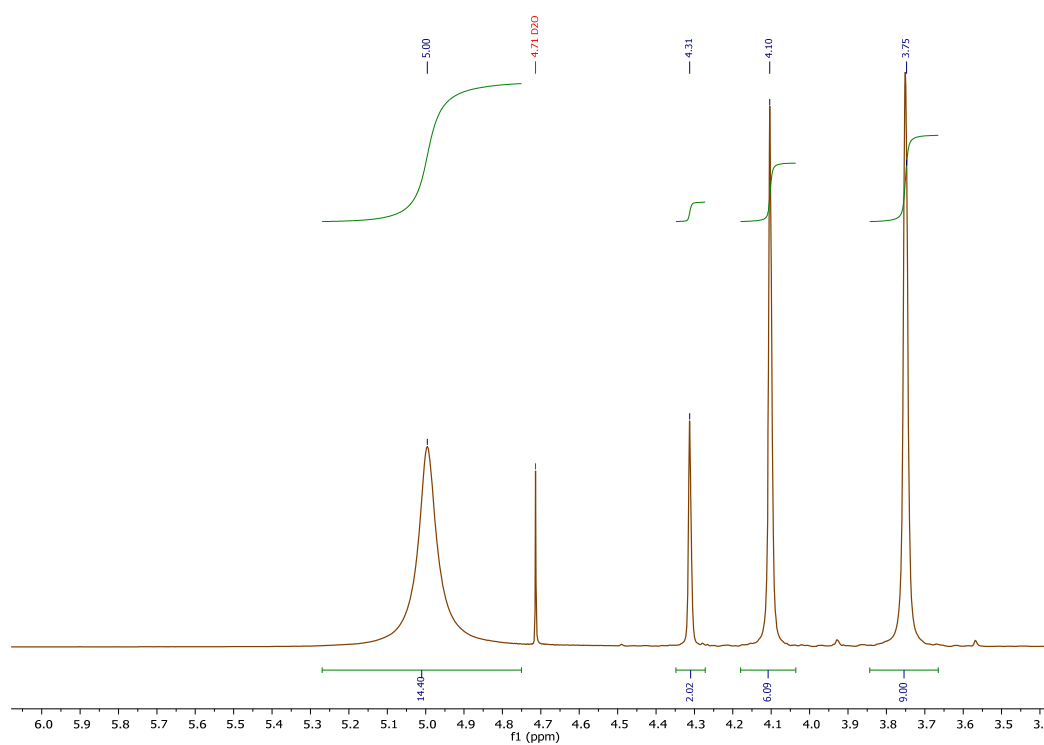

<sup>1</sup>H-NMR (400 MHz):  $\delta$ : 5.00 (s, OH, 1.52\*2H), 4.31 (s, CH<sub>2</sub>, 2H), 4.10 (s, CH<sub>2</sub>-OH, 1.52\*4H), 3.75 (s, NME<sub>3</sub>, 9H)

Gb/D1 1:2.02 + 6 eq H<sub>2</sub>O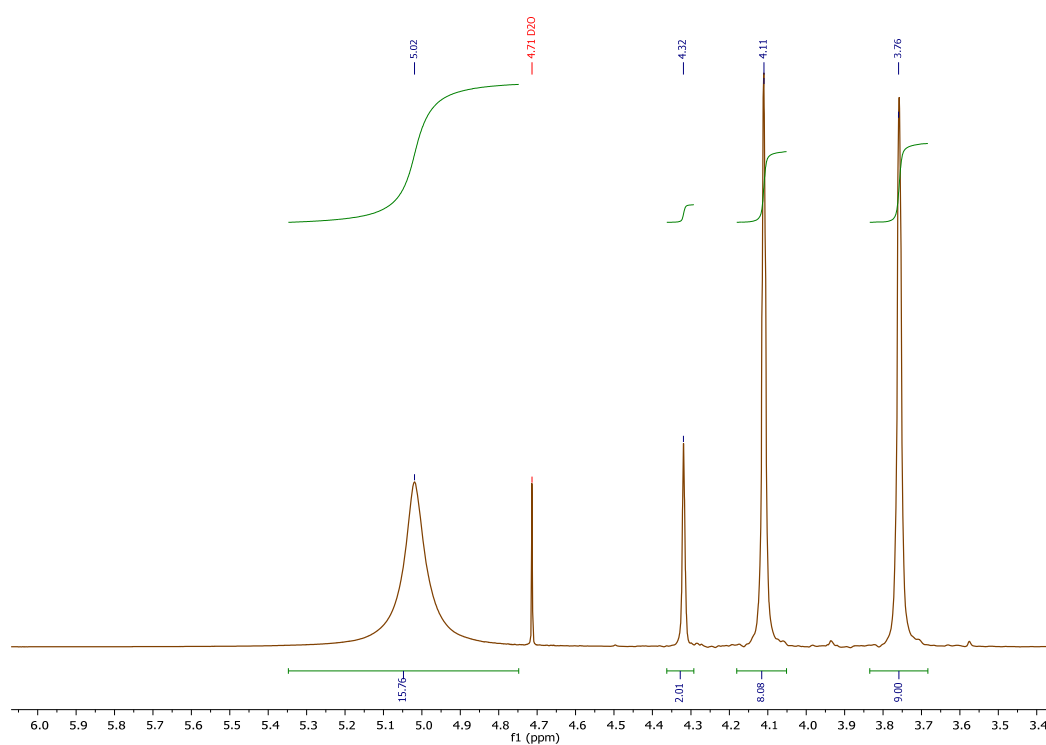

<sup>1</sup>H-NMR (400 MHz):  $\delta$ : 5.02 (s, OH, 2.02\*2H), 4.32 (s, CH<sub>2</sub>, 2H), 4.11 (s, CH<sub>2</sub>-OH, 2.02\*4H), 3.76 (s, NME<sub>3</sub>, 9H)

Gb/D1 1:3.02 + 6 eq H<sub>2</sub>O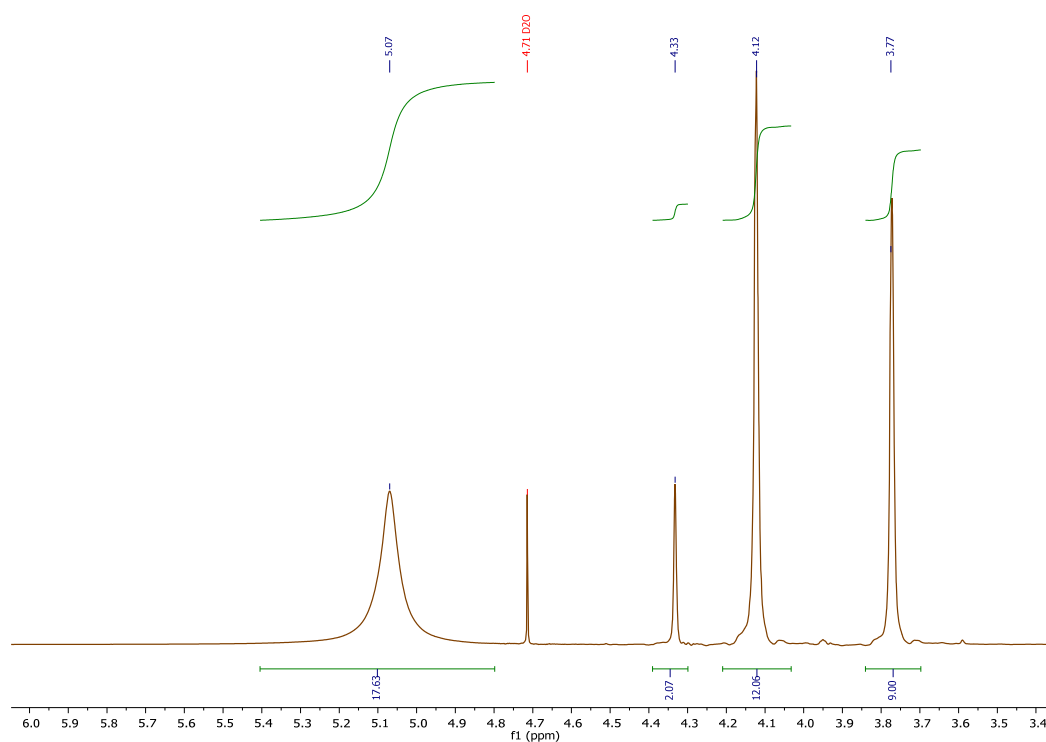

<sup>1</sup>H-NMR (400 MHz):  $\delta$ : 5.07 (s, OH, 3.02\*2H), 4.33 (s, CH<sub>2</sub>, 2H), 4.12 (s, CH<sub>2</sub>-OH, 3.02\*4H), 3.77 (s, NME<sub>3</sub>, 9H)

Gb/D1 1:4.10 + 6 eq H<sub>2</sub>O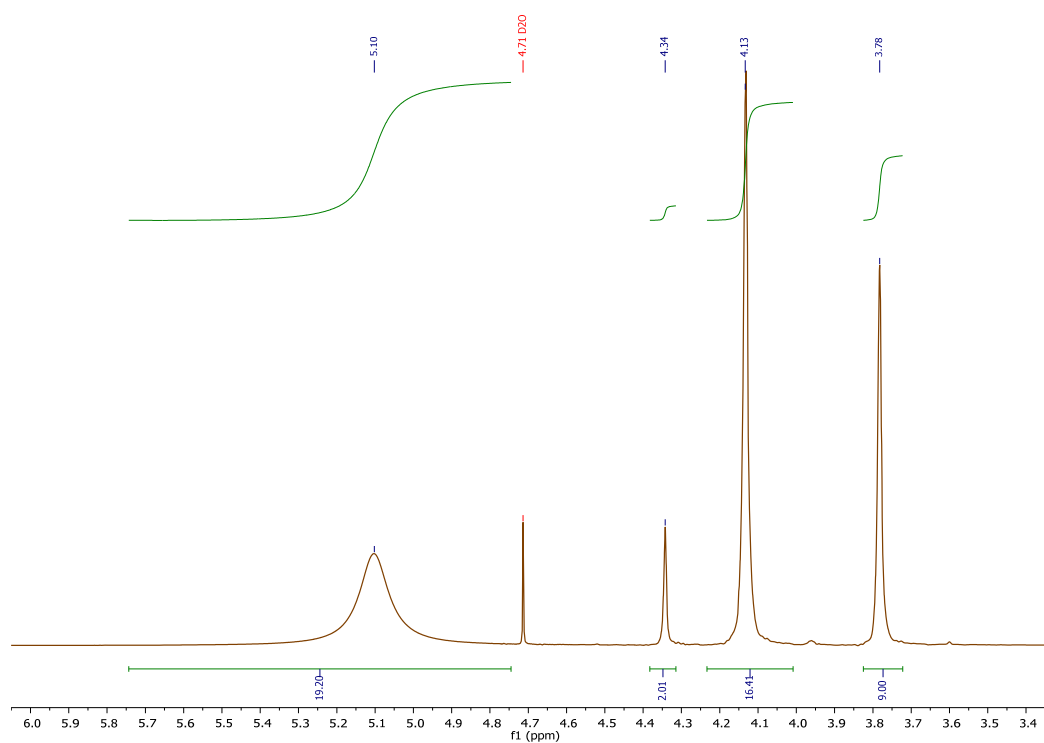

<sup>1</sup>H-NMR (400 MHz):  $\delta$ : 5.10 (s, OH, 4.10\*2H), 4.34 (s, CH<sub>2</sub>, 2H), 4.13 (s, CH<sub>2</sub>-OH, 4.10\*4H), 3.78 (s, NME<sub>3</sub>, 9H)

Gb/D1 1:6.05 + 6 eq H<sub>2</sub>O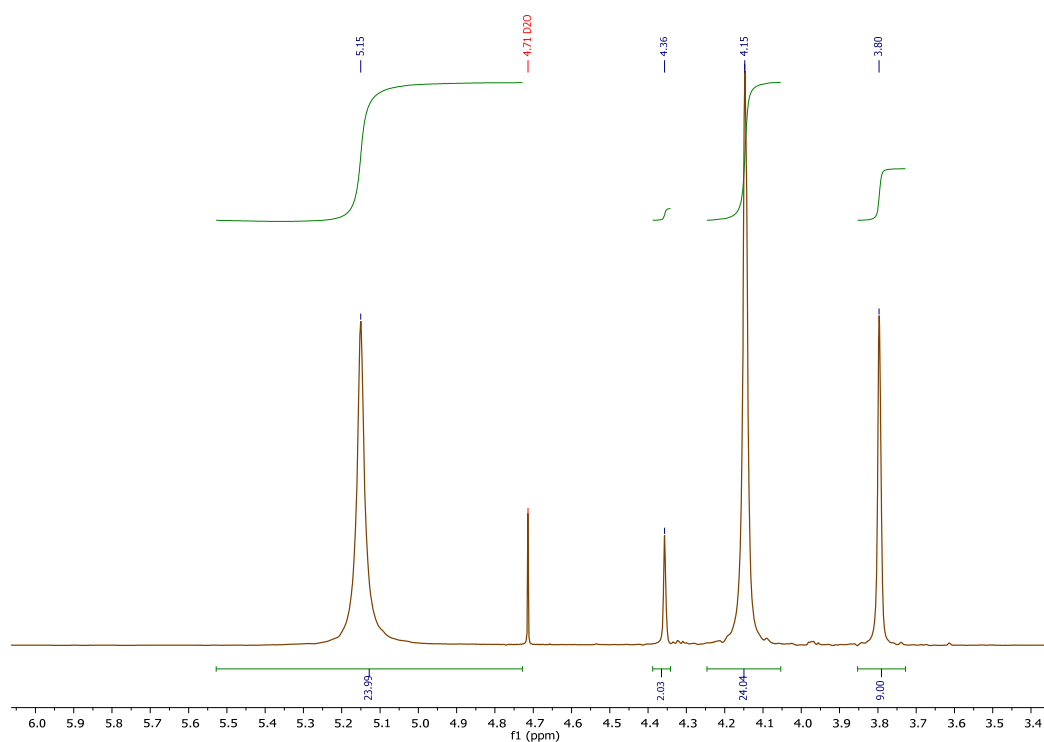

<sup>1</sup>H-NMR (400 MHz):  $\delta$ : 5.15 (s, OH, 6.05\*2H), 4.36 (s, CH<sub>2</sub>, 2H), 4.15 (s, CH<sub>2</sub>-OH, 6.05\*4H), 3.80 (s, NME<sub>3</sub>, 9H)

**Gb/D1 1:9.11 + 6 eq H<sub>2</sub>O**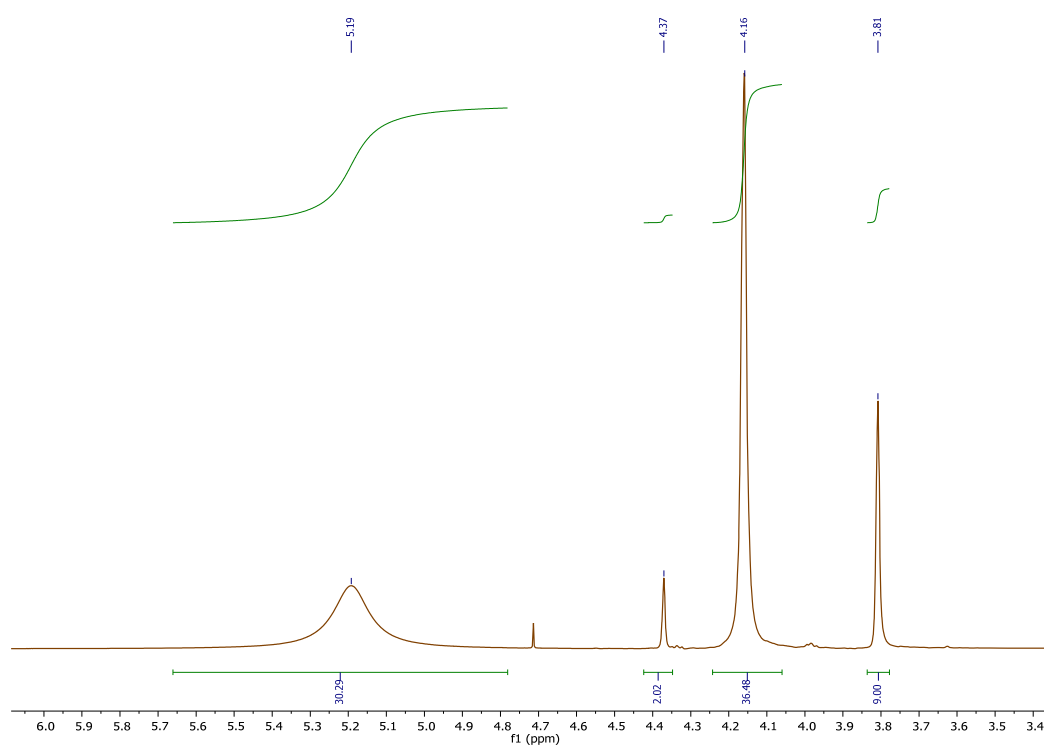

<sup>1</sup>H-NMR (400 MHz):  $\delta$ : 5.19 (s, OH, 9.11\*2H), 4.37 (s, CH<sub>2</sub>, 2H), 4.16 (s, CH<sub>2</sub>-OH, 9.11\*4H), 3.81 (s, NME<sub>3</sub>, 9H)

**Gb/D1 1:11.82 + 6 eq H<sub>2</sub>O**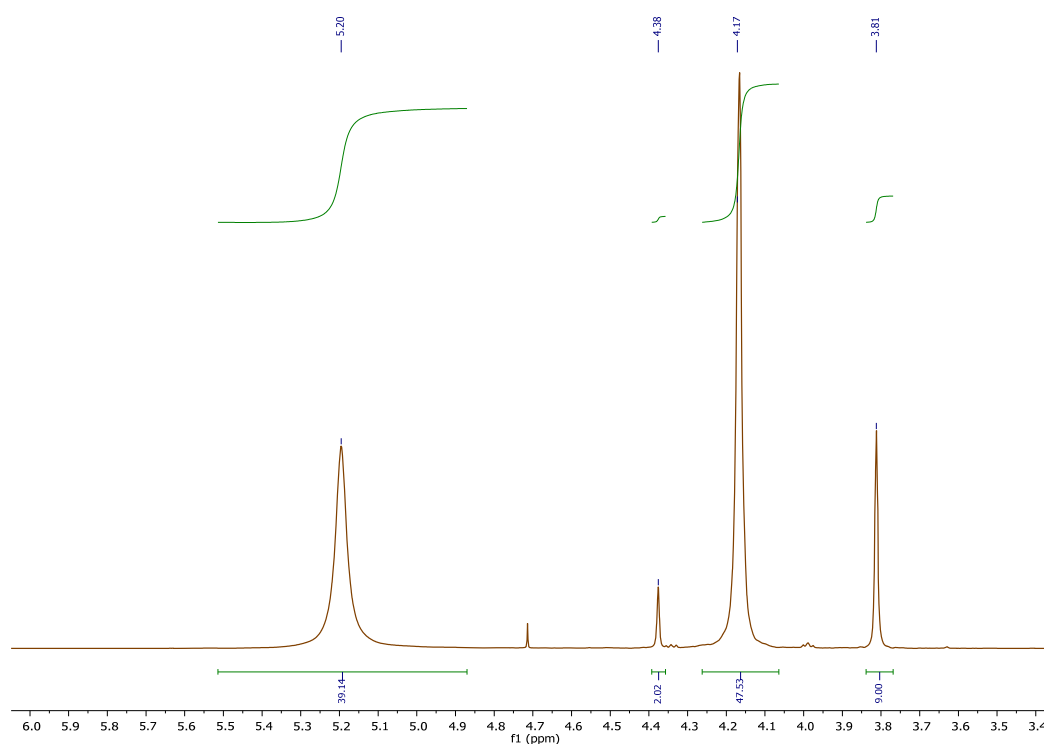

<sup>1</sup>H-NMR (400 MHz):  $\delta$ : 5.20 (s, OH, 11.82\*2H), 4.38 (s, CH<sub>2</sub>, 2H), 4.17 (s, CH<sub>2</sub>-OH, 11.82\*4H), 3.81 (s, NME<sub>3</sub>, 9H)

1.4.  $^1\text{H-NMR}$  spectra of Gb/D2 mixtures

## Gb/D2 1:3.66

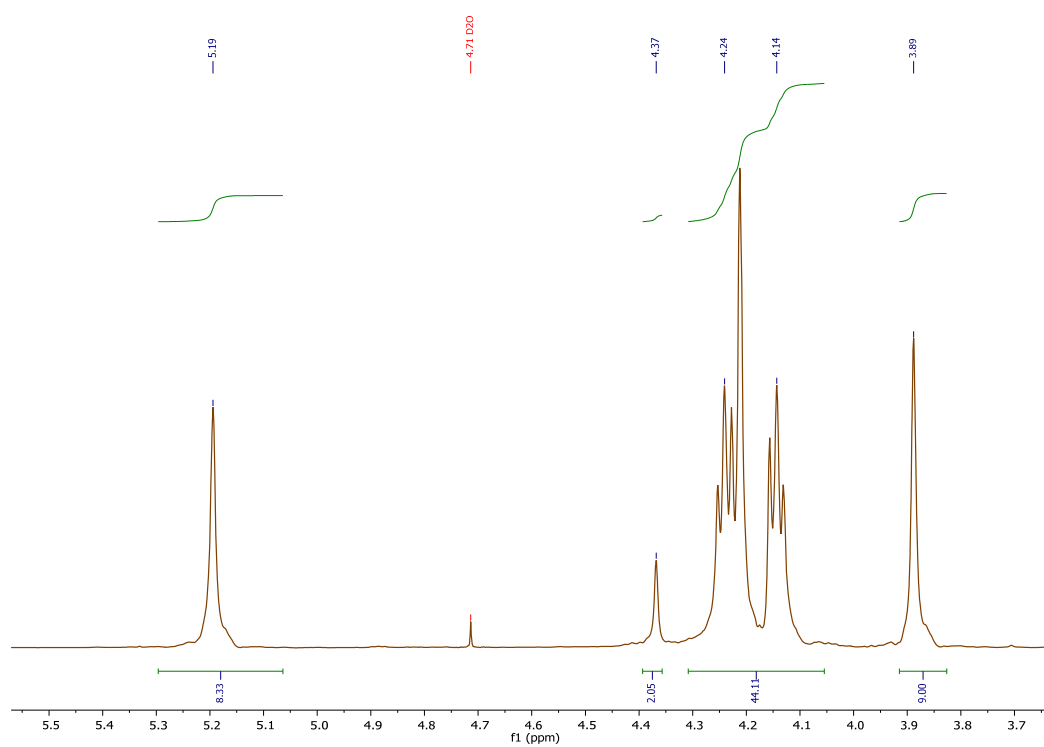

$^1\text{H-NMR}$  (400 MHz):  $\delta$ : 5.19 (s, OH, 3.66\*2H), 4.37 (s,  $\text{CH}_2$ , 2H), 4.24-4.14 (m,  $\text{CH}_2\text{-OH}$  and  $\text{CH}_2\text{-O-CH}_2$ , 3.66\*12H), 3.84 (s,  $\text{NME}_3$ , 9H)

## Gb/D2 1:3.76

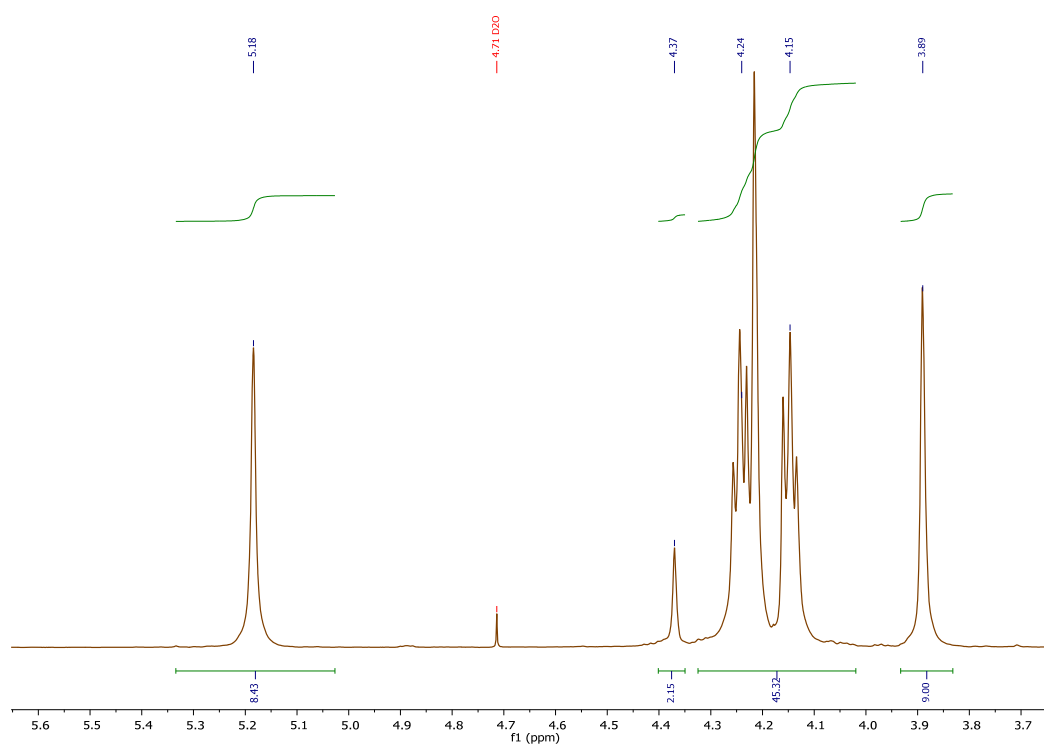

$^1\text{H-NMR}$  (400 MHz):  $\delta$ : 5.18 (s, OH, 3.76\*2H), 4.37 (s,  $\text{CH}_2$ , 2H), 4.24-4.15 (m,  $\text{CH}_2\text{-OH}$  and  $\text{CH}_2\text{-O-CH}_2$ , 3.66\*12H), 3.89 (s,  $\text{NME}_3$ , 9H)

## Gb/D2 1:4.21

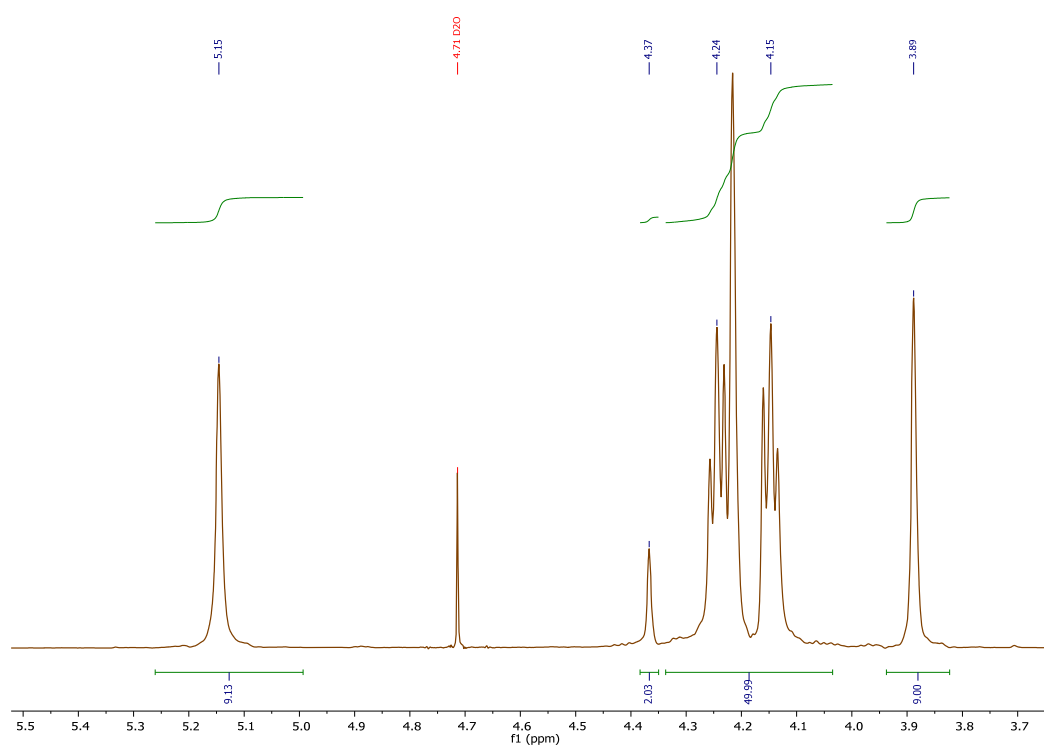

<sup>1</sup>H-NMR (400 MHz):  $\delta$ : 5.15 (s, OH, 4.21\*2H), 4.37 (s, CH<sub>2</sub>, 2H), 4.24-4.15 (m, CH<sub>2</sub>-OH and CH<sub>2</sub>-O-CH<sub>2</sub>, 4.21\*12H), 3.89 (s, NME<sub>3</sub>, 9H)

## Gb/D2 1:6.07

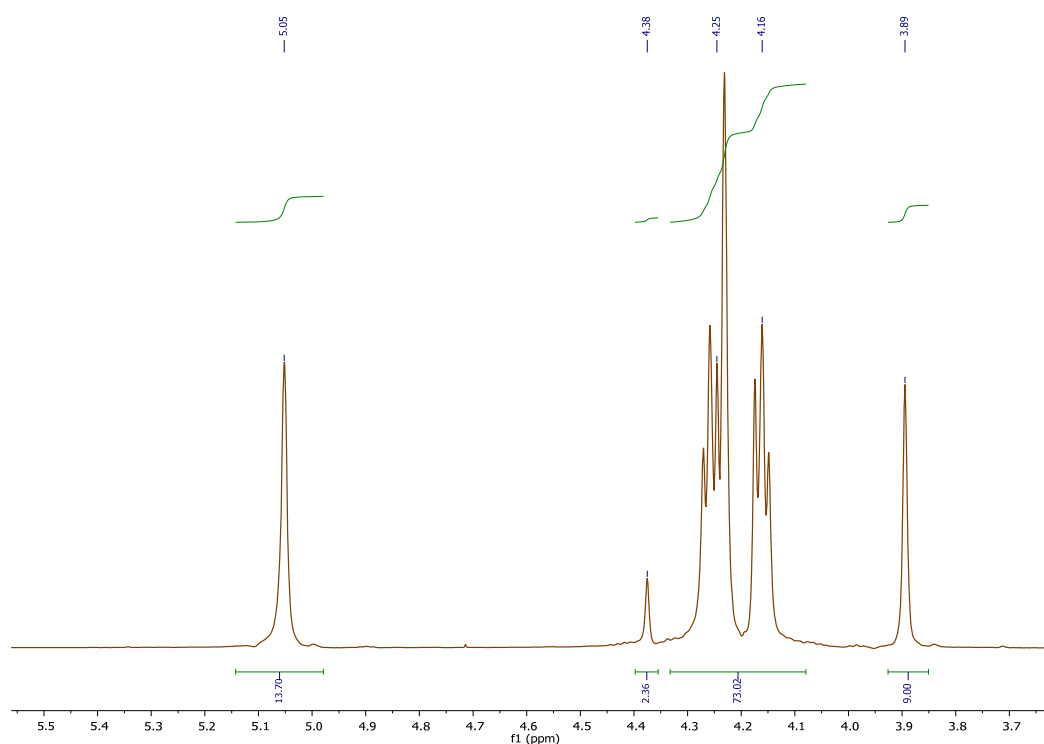

<sup>1</sup>H-NMR (400 MHz):  $\delta$ : 5.05 (s, OH, 6.07\*2H), 4.38 (s, CH<sub>2</sub>, 2H), 4.25-4.16 (m, CH<sub>2</sub>-OH and CH<sub>2</sub>-O-CH<sub>2</sub>, 6.07\*12H), 3.89 (s, NME<sub>3</sub>, 9H)

## Gb/D2 1:8.91

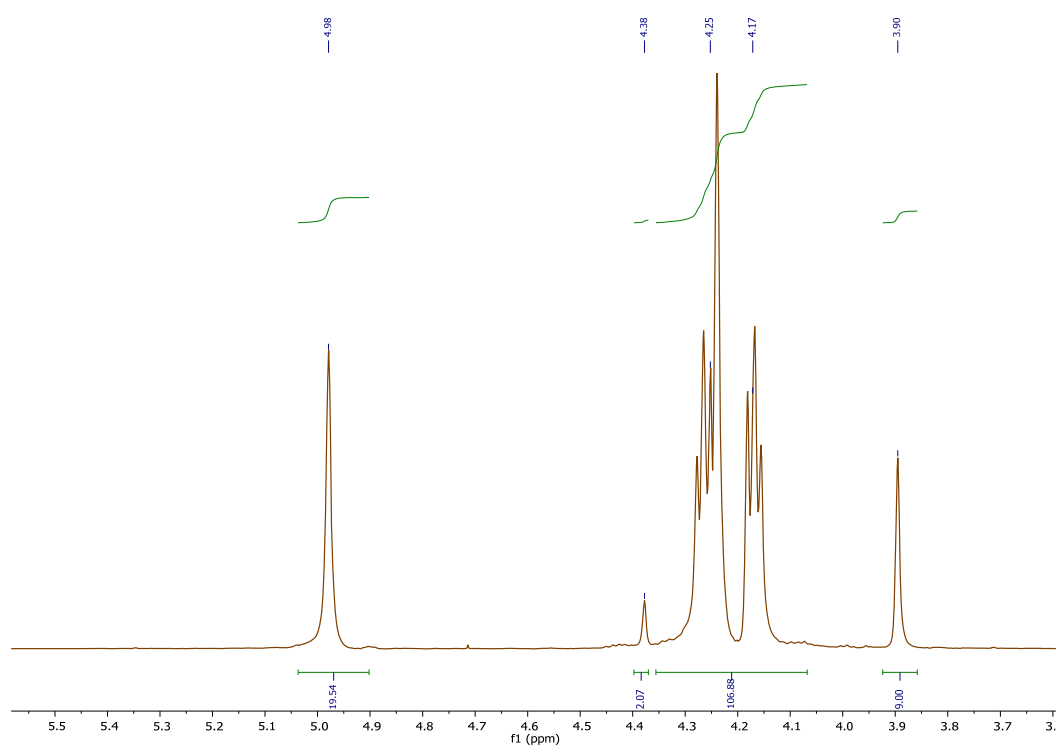

<sup>1</sup>H-NMR (400 MHz):  $\delta$ : 4.98 (s, OH, 8.91\*2H), 4.38 (s, CH<sub>2</sub>, 2H), 4.25-4.17 (m, CH<sub>2</sub>-OH and CH<sub>2</sub>-O-CH<sub>2</sub>, 8.91\*12H), 3.90 (s, NME<sub>3</sub>, 9H)

## D2

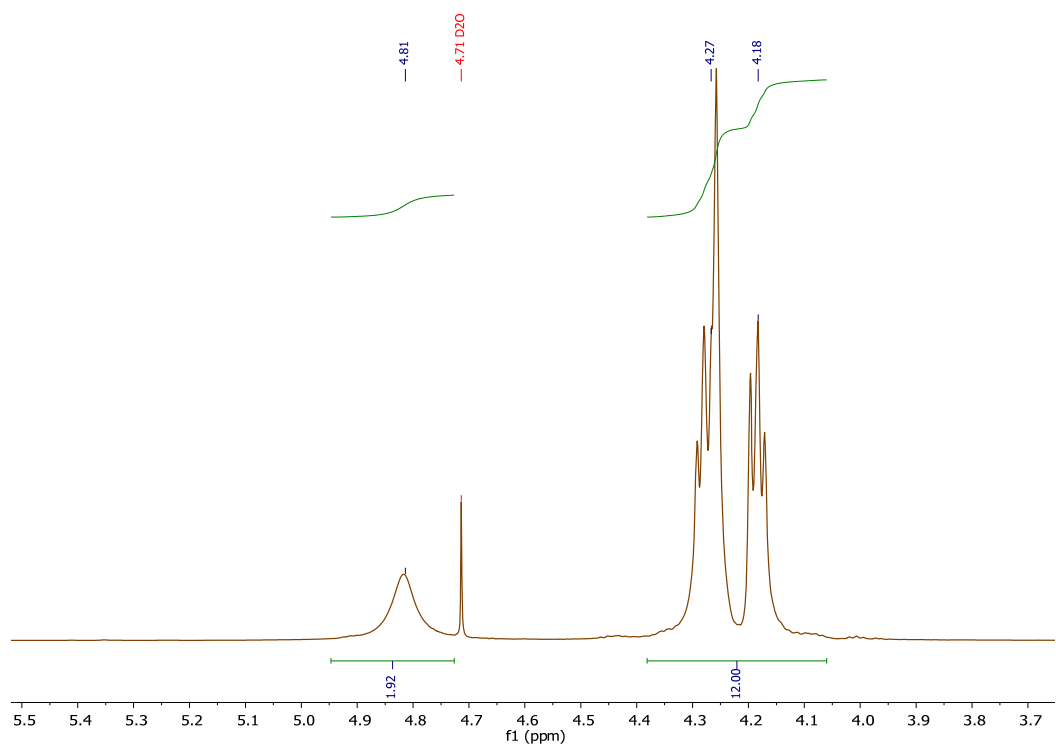

<sup>1</sup>H-NMR (400 MHz):  $\delta$ : 4.81 (s, OH), 4.25-4.18 (m, CH<sub>2</sub>-OH and CH<sub>2</sub>-O-CH<sub>2</sub>, 12H)

1.5.  $^1\text{H-NMR}$  spectra of Gb/D3 mixtures

## Gb/D3 1:2.86

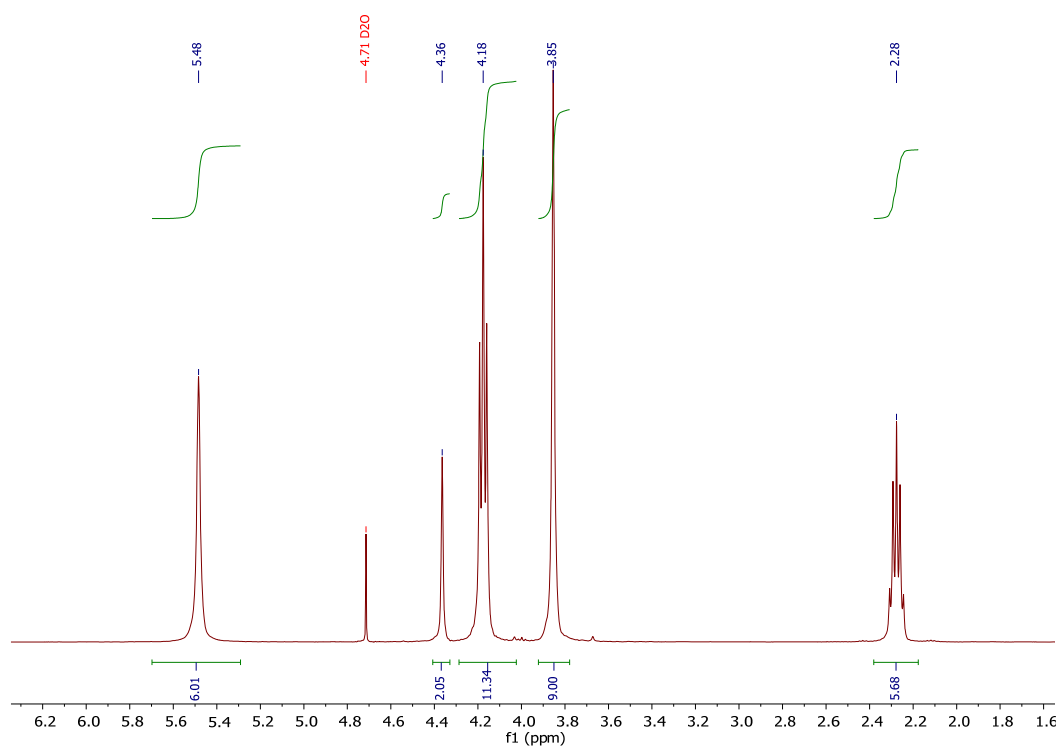

$^1\text{H-NMR}$  (400 MHz):  $\delta$ : 5.48 (s, OH, 2.86\*2H), 4.36 (s,  $\text{CH}_2$ , 2H), 4.18 (t,  $\text{CH}_2\text{-OH}$ , 2.86\*4H), 3.85 (s,  $\text{NMe}_3$ , 9H), 2.28 (m,  $\text{CH}_2\text{-CH}_2\text{-CH}_2$ , 2.86\*2H)

## Gb/D3 1:2.93

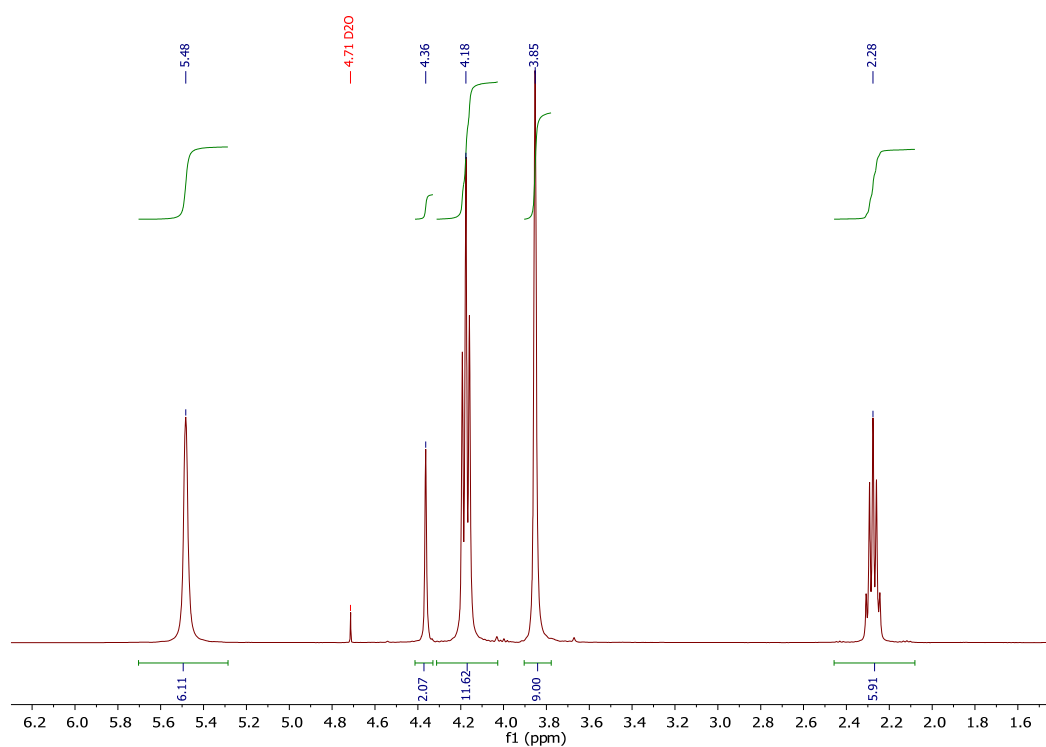

$^1\text{H-NMR}$  (400 MHz):  $\delta$ : 5.48 (s, OH, 2.93\*2H), 4.36 (s,  $\text{CH}_2$ , 2H), 4.18 (t,  $\text{CH}_2\text{-OH}$ , 2.93\*4H), 3.85 (s,  $\text{NMe}_3$ , 9H), 2.28 (m,  $\text{CH}_2\text{-CH}_2\text{-CH}_2$ , 2.93\*2H)



## Gb/D3 1:3.10

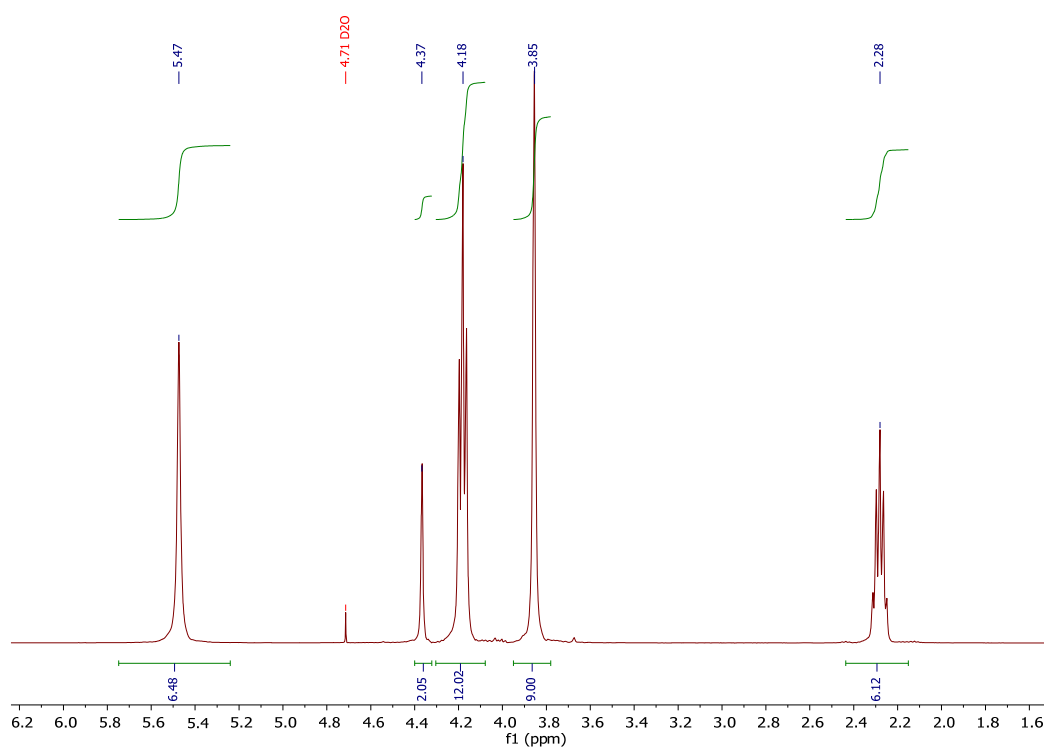

<sup>1</sup>H-NMR (400 MHz):  $\delta$ : 5.47 (s, OH, 3.10\*2H), 4.37 (s, CH<sub>2</sub>, 2H), 4.18 (t, CH<sub>2</sub>-OH, 3.10\*4H), 3.85 (s, NME<sub>3</sub>, 9H), 2.28 (m, CH<sub>2</sub>-CH<sub>2</sub>-CH<sub>2</sub>, 3.10\*2H)

## Gb/D3 1:4.05

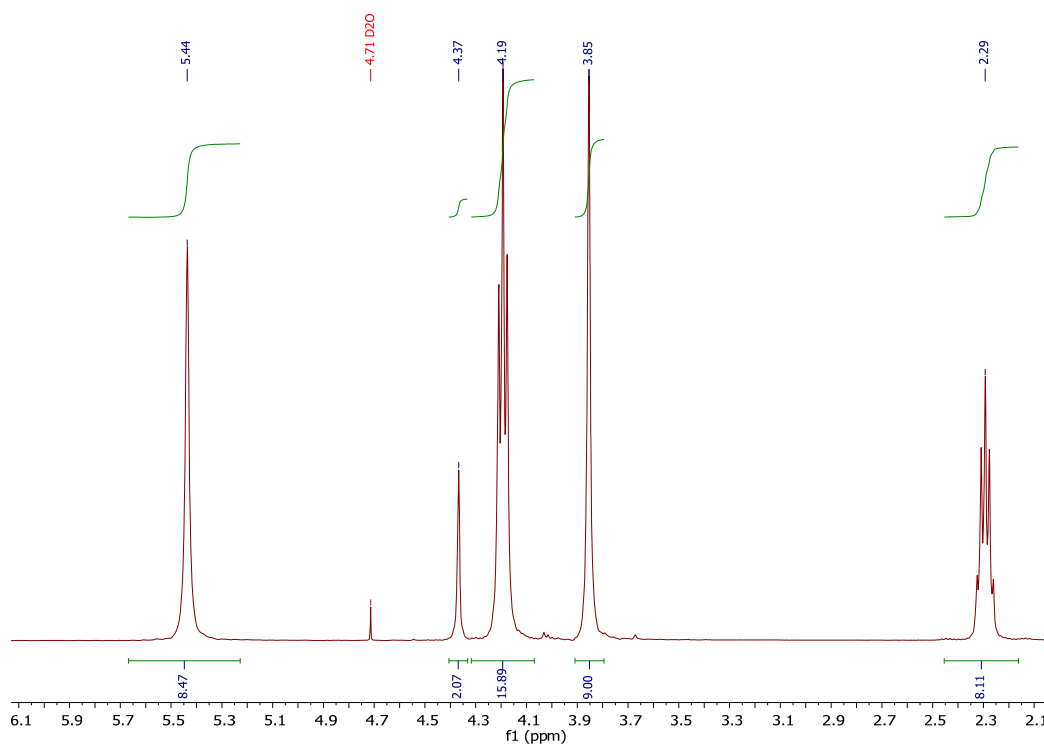

<sup>1</sup>H-NMR (400 MHz):  $\delta$ : 5.44 (s, OH, 4.05\*2H), 4.37 (s, CH<sub>2</sub>, 2H), 4.19 (t, CH<sub>2</sub>-OH, 4.05\*4H), 3.85 (s, NME<sub>3</sub>, 9H), 2.29 (m, CH<sub>2</sub>-CH<sub>2</sub>-CH<sub>2</sub>, 4.05\*2H)

## Gb/D3 1:6.32

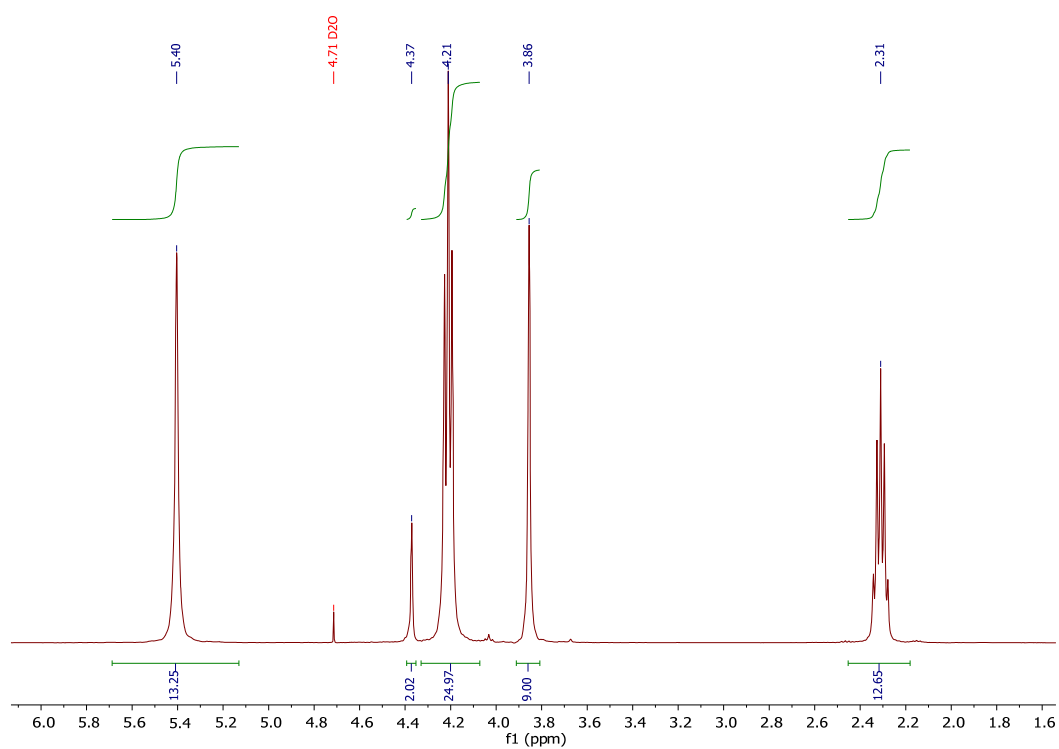

## Gb/D3 1:12.27

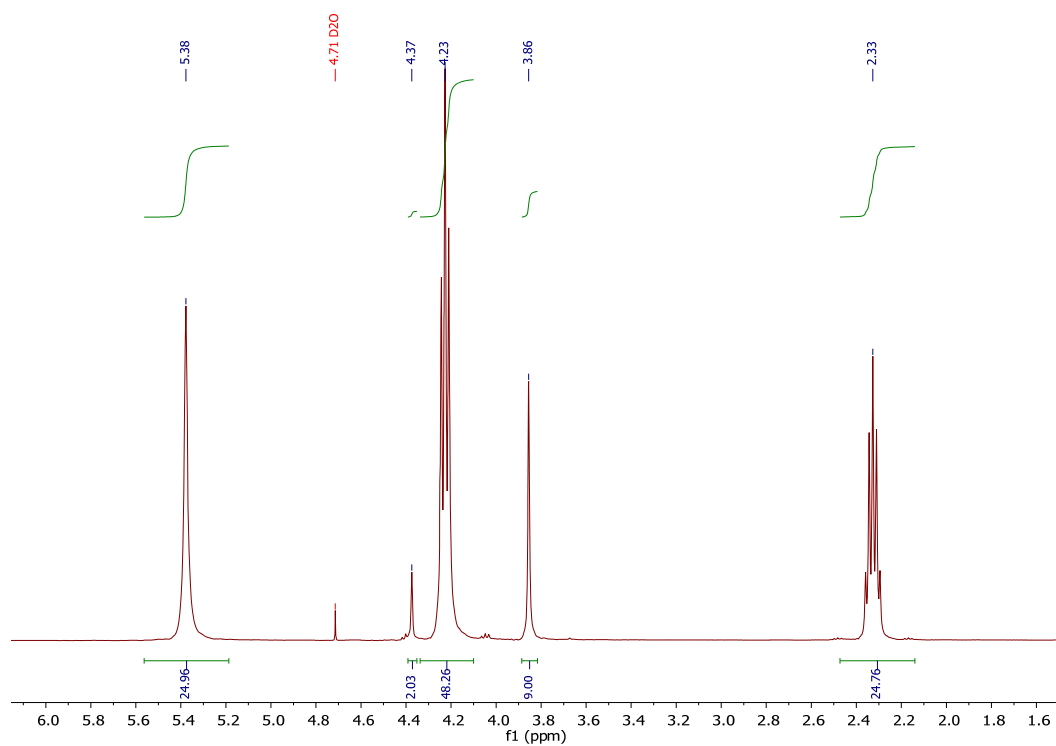

D3

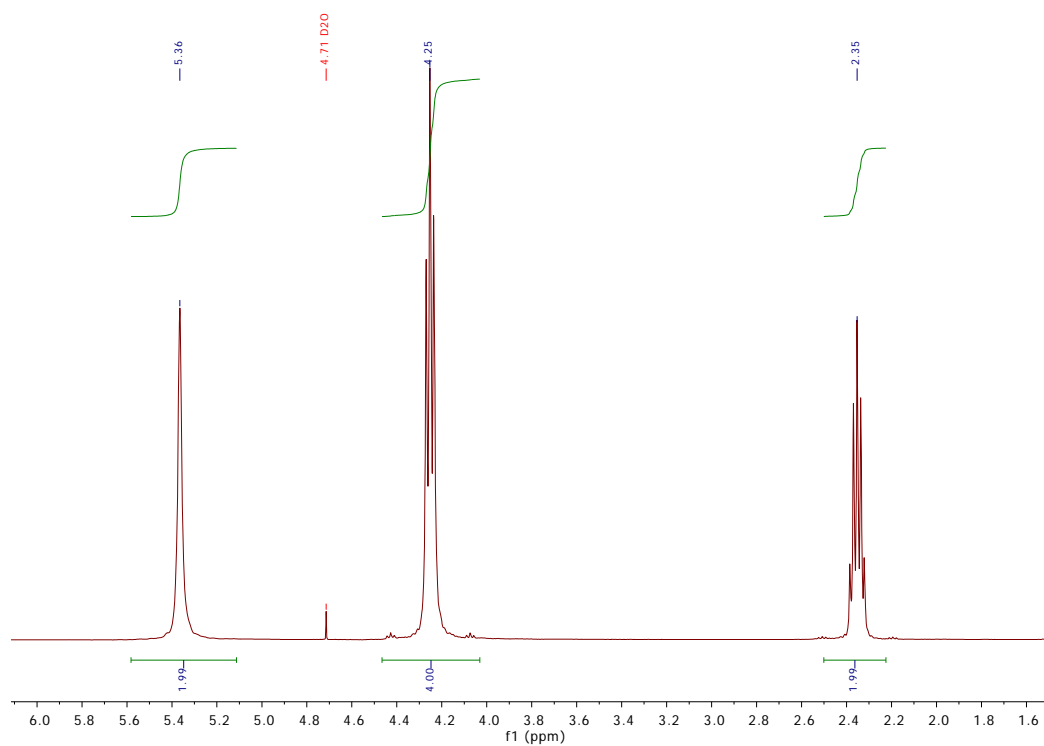

$^1\text{H-NMR}$  (400 MHz):  $\delta$ : 5.36 (s, OH), 4.25 (t,  $\text{CH}_2\text{-OH}$ , 4H), 2.35 (m,  $\text{CH}_2\text{-CH}_2\text{-CH}_2$ , 2H)

## 2. Copies of $T_1$ exponential fitting by inversion recovery technique

### 2.1. $T_1$ exponential fitting of Gb/D1 mixtures

Gb/D1 1:2.44

$T_1$ : 1.42 sec  $\pm$  1.244e-05

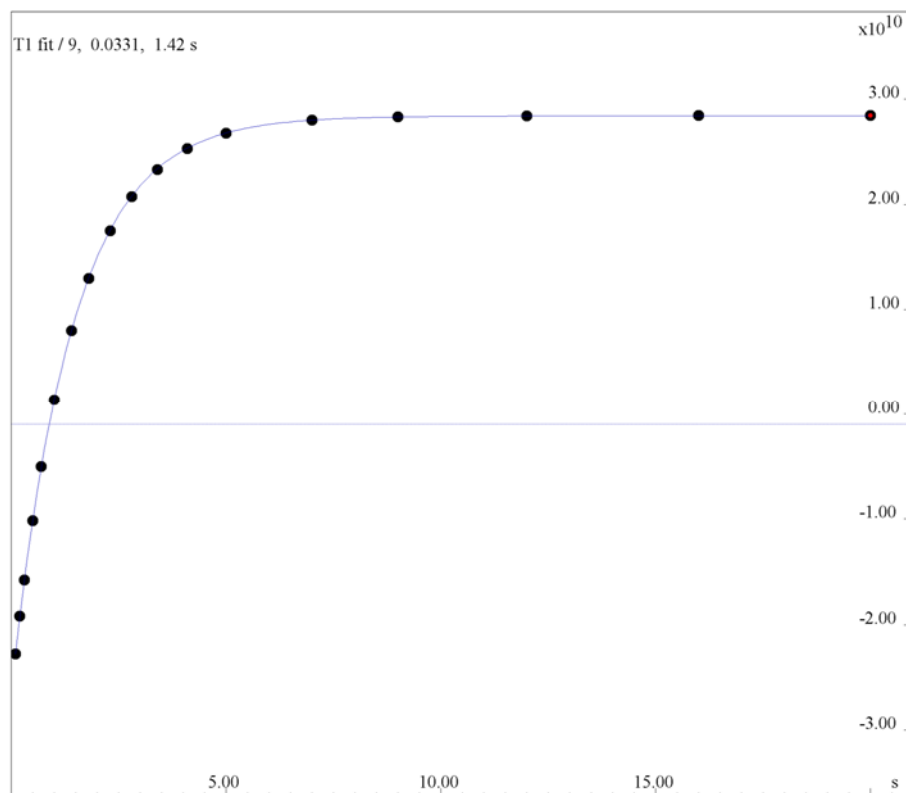

**Gb/D1 1:2.73**

$$T_1: 1.34 \pm 2.188e-06$$

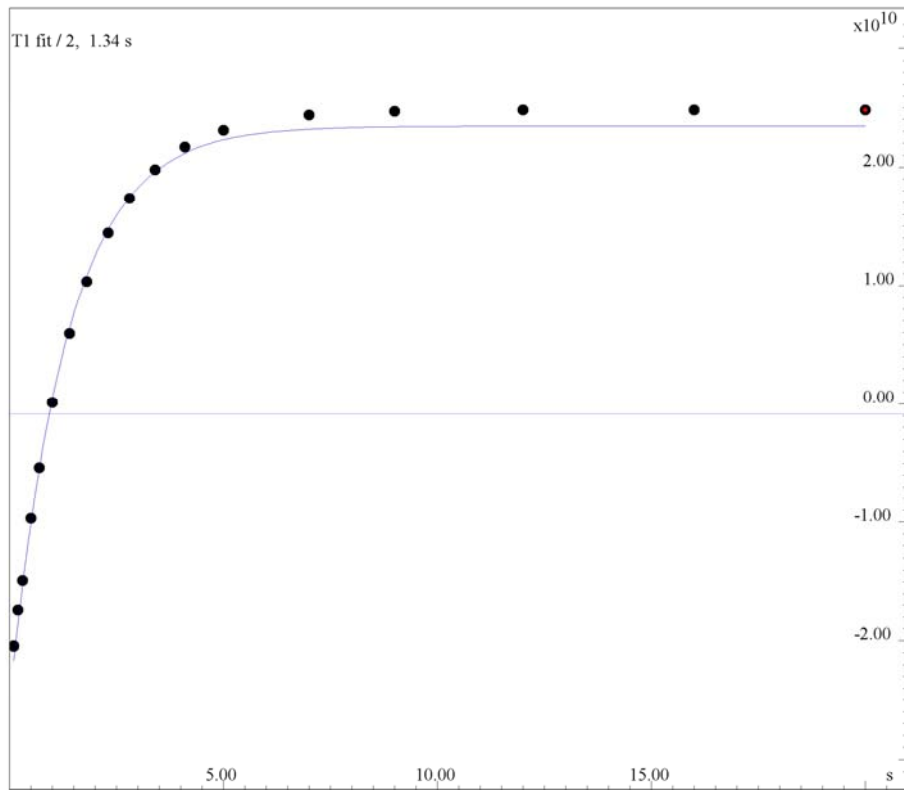**Gb/D1 1:2.85**

$$T_1: 1.26 \pm 2.585e-05$$

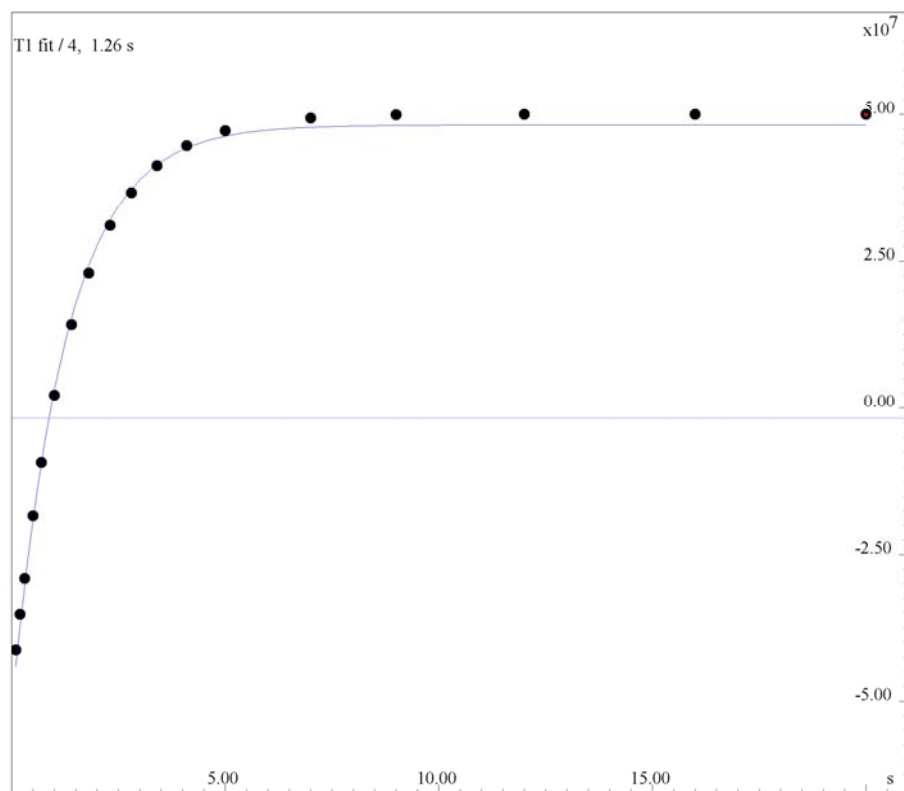

**Gb/D1 1:3.18** $T_1: 1.42 \pm 0.059$ 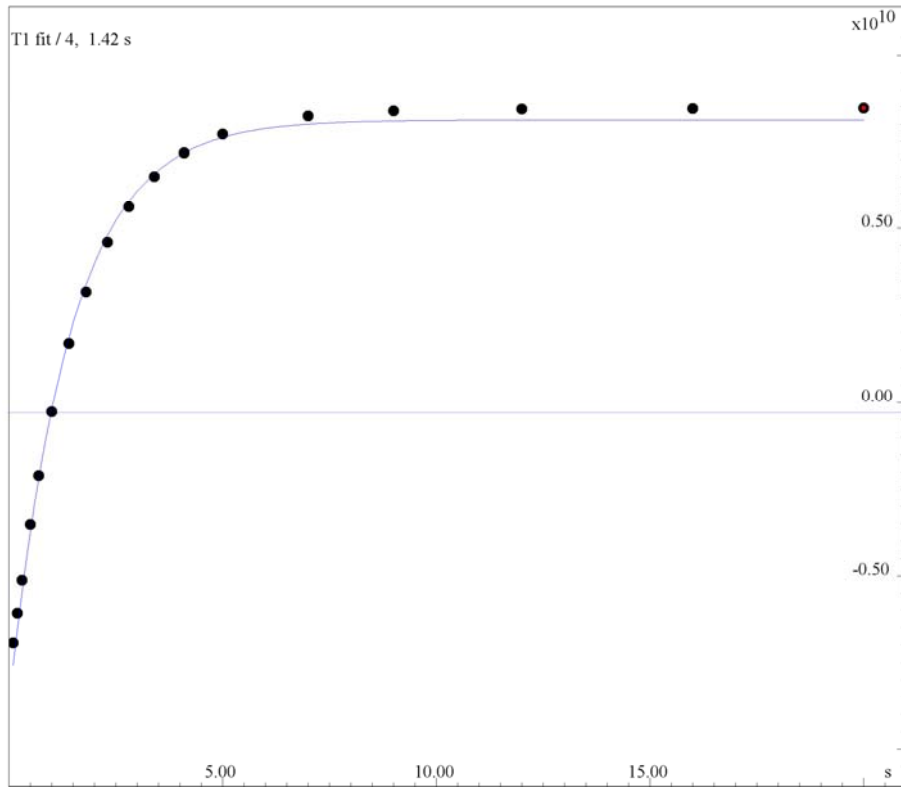**Gb/D1 1:3.91** $T_1: 1.55 \pm 0.040$ 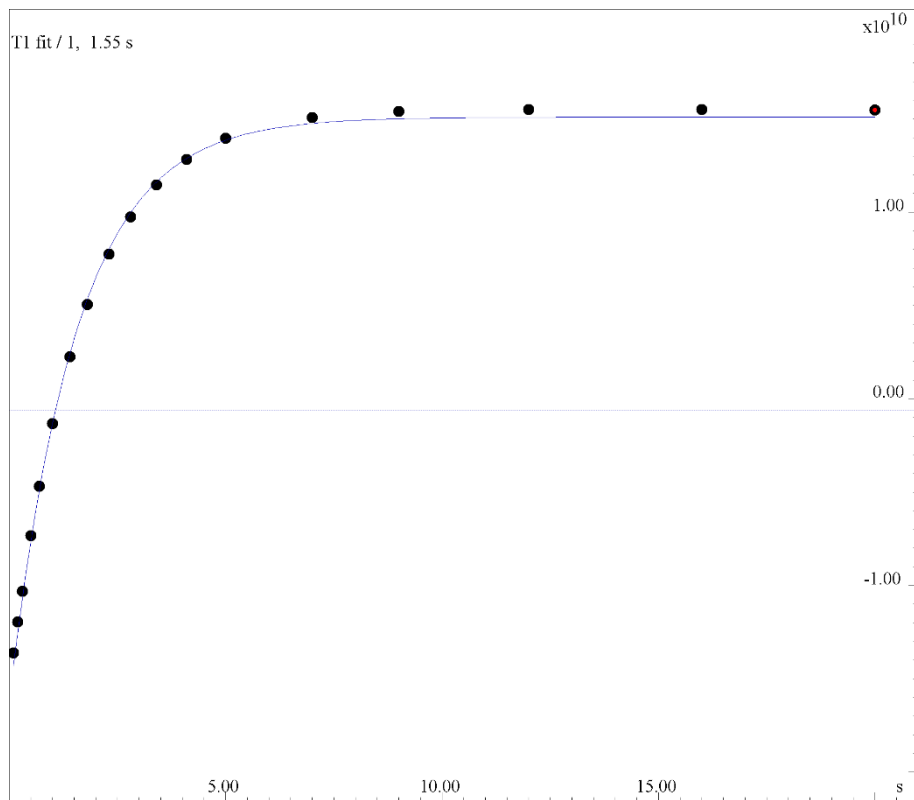

**Gb/D1 1:4.85** $T_1: 1.69 \pm 2.675e-06$ 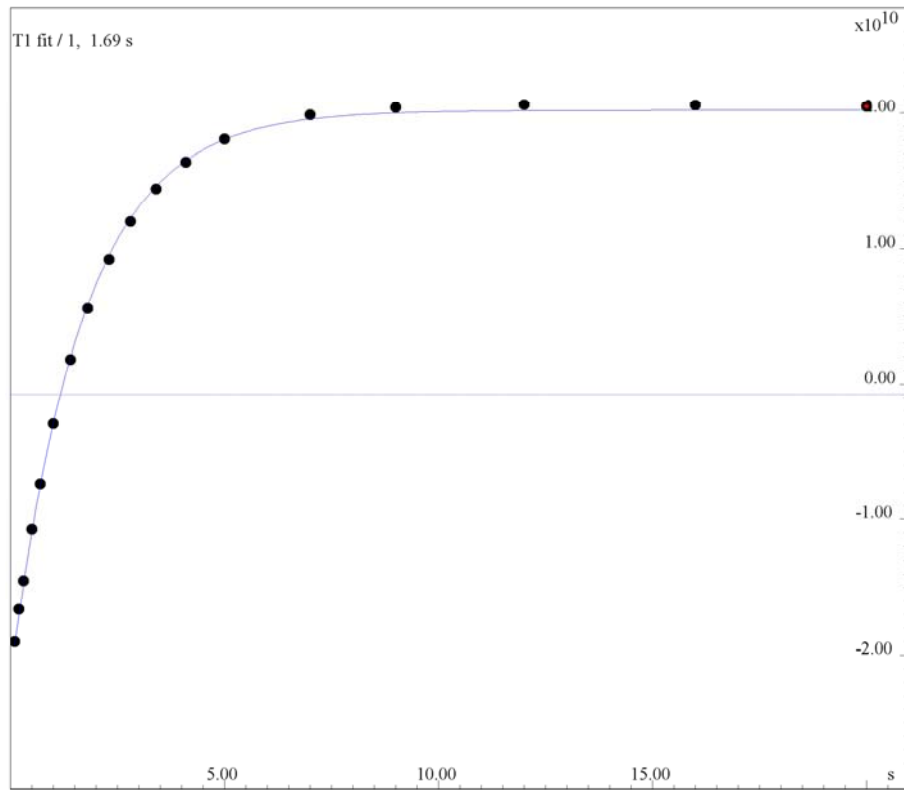**Gb/D1 1:8.65** $T_1: 1.96 \pm 1.964e-05$ 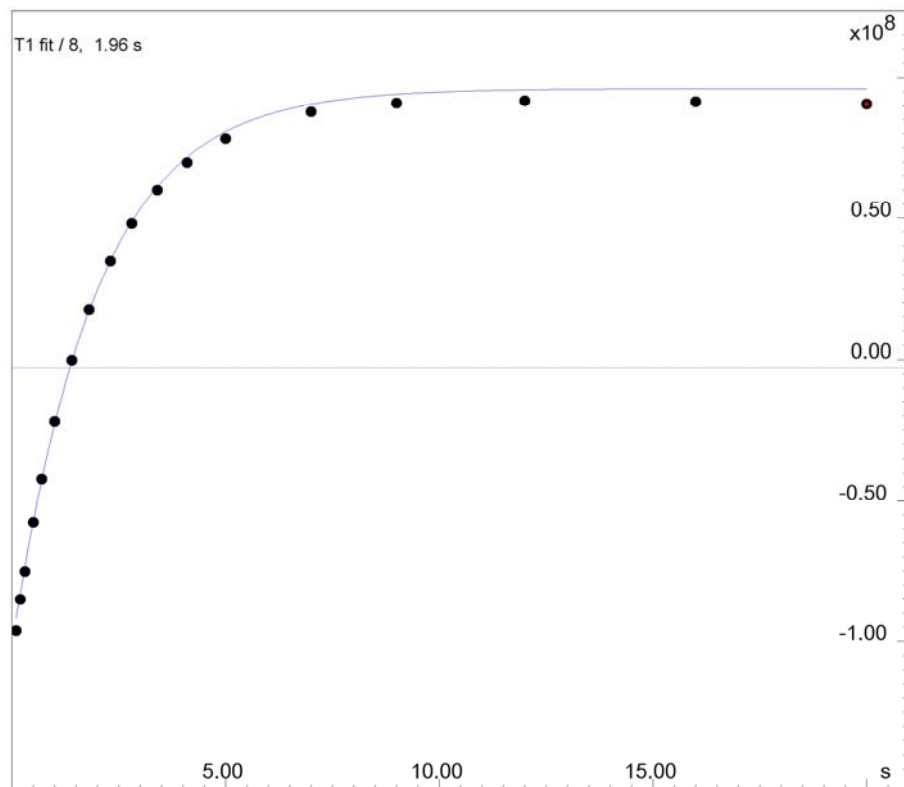

**D1** $T_1: 2.63 \pm 4.870e-18$ 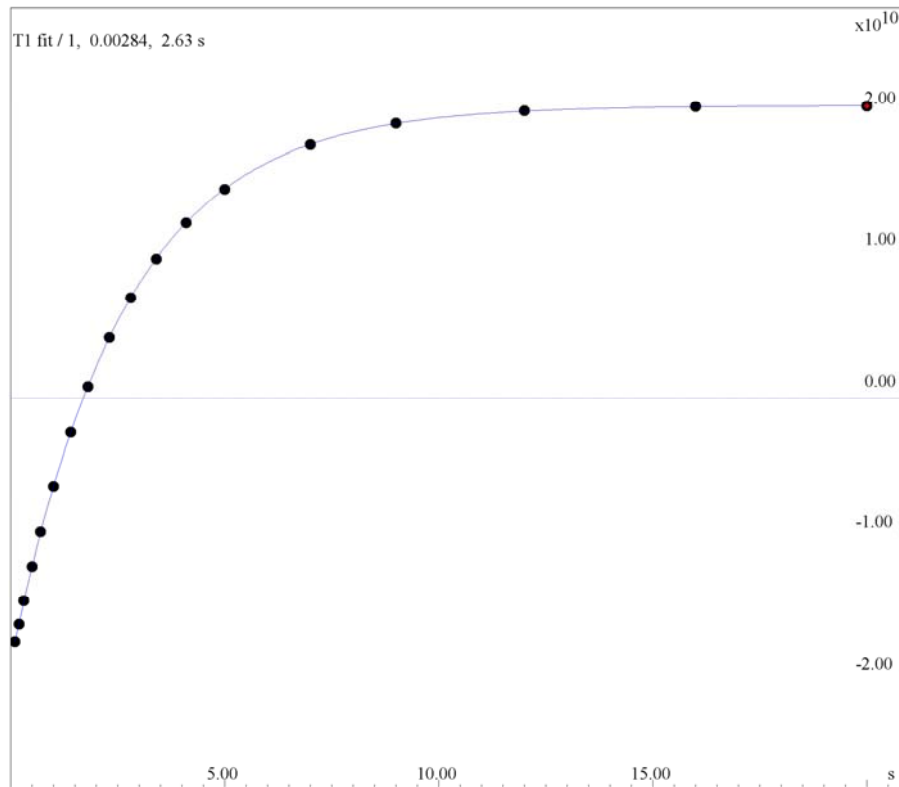**2.2.  $T_1$  exponential fitting of Gb/D1 mixtures + 3 eq H<sub>2</sub>O****Gb/D1 1:2.01 + 3 eq H<sub>2</sub>O** $T_1: 1.89 \text{ sec} \pm 0.01278$ 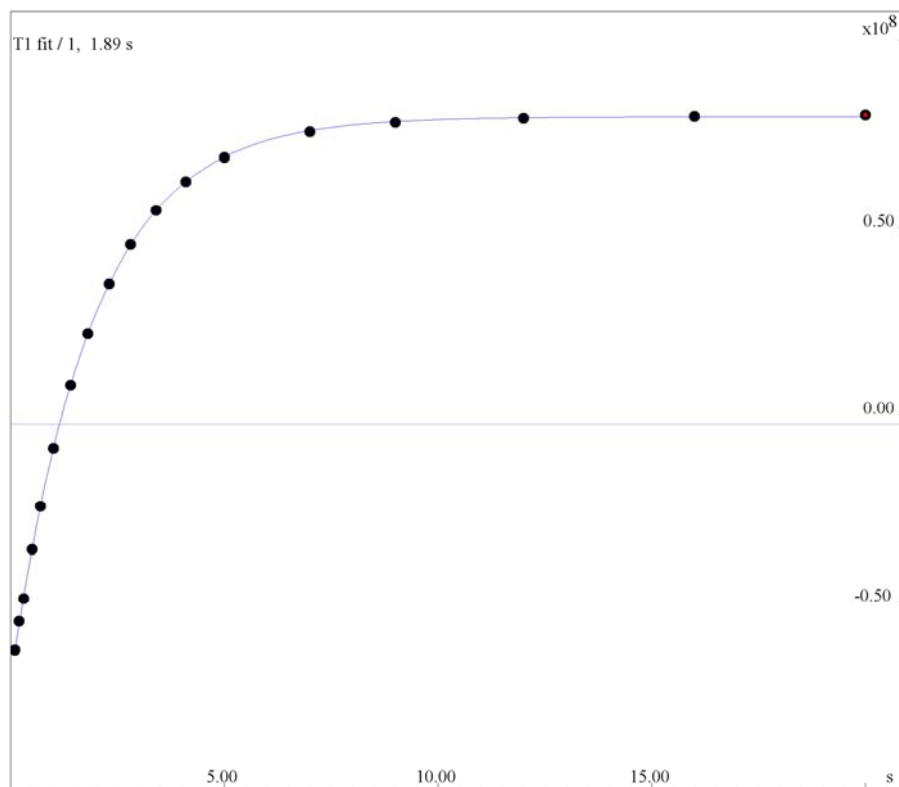

**Gb/D1 1:2.49+3 eq H<sub>2</sub>O** $T_1: 1.72 \text{ sec} \pm 4.062\text{e-}06$ 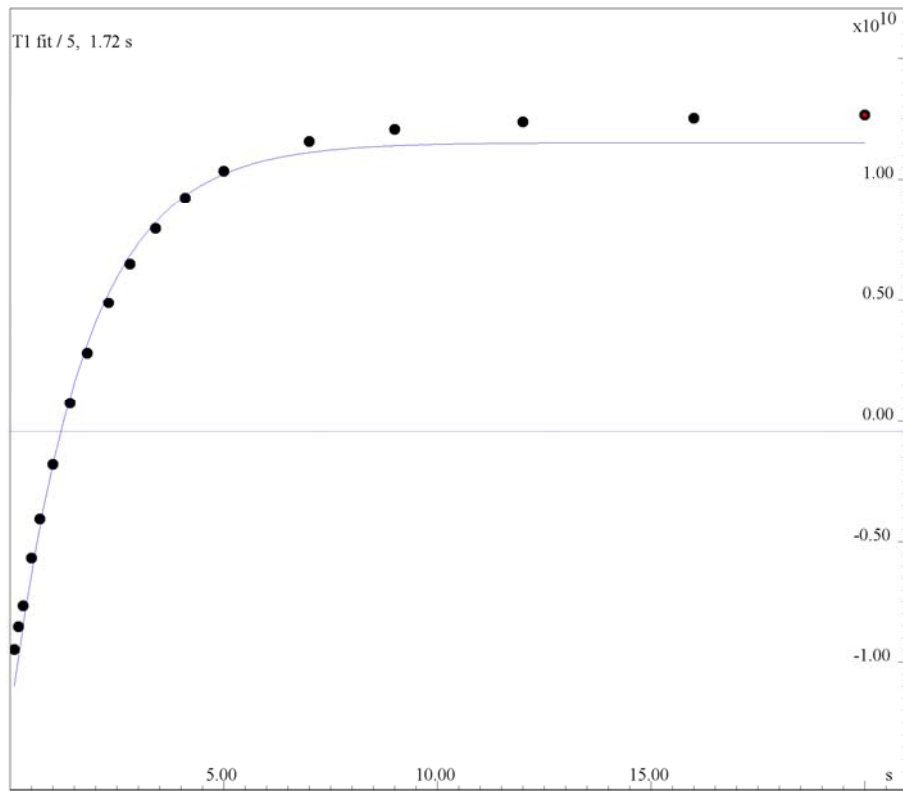**Gb/D1 1:2.85+3 eq H<sub>2</sub>O** $T_1: 1.59 \text{ sec} \pm 0.041$ 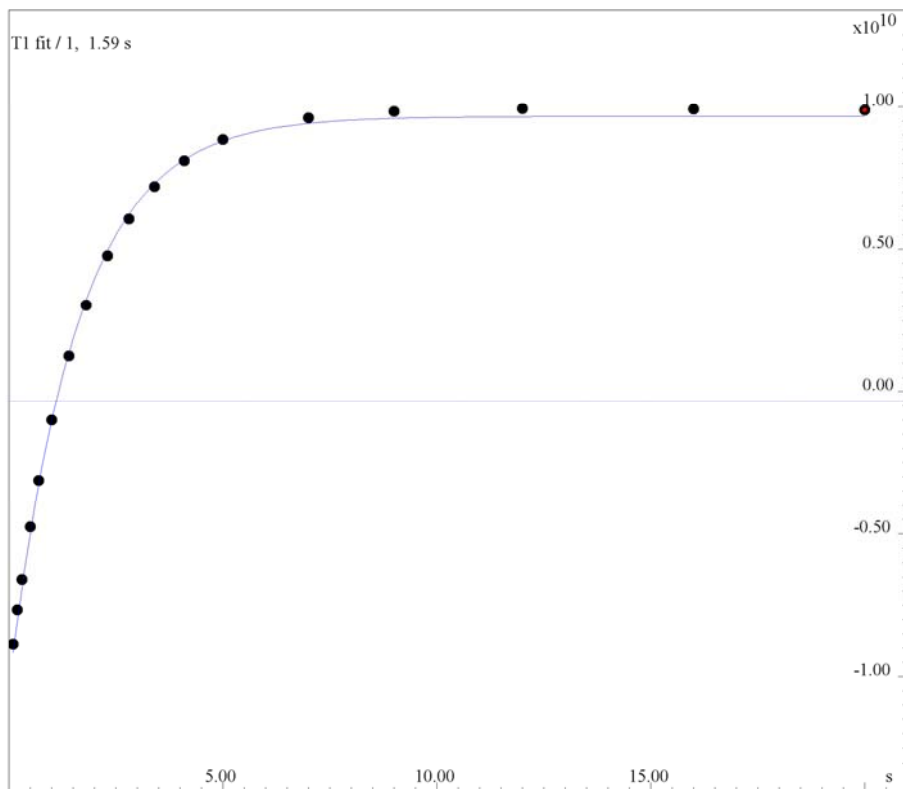



**Gb/D1 1:3.11+3 eq H<sub>2</sub>O** $T_1: 1.65 \text{ sec} \pm 0.022$ 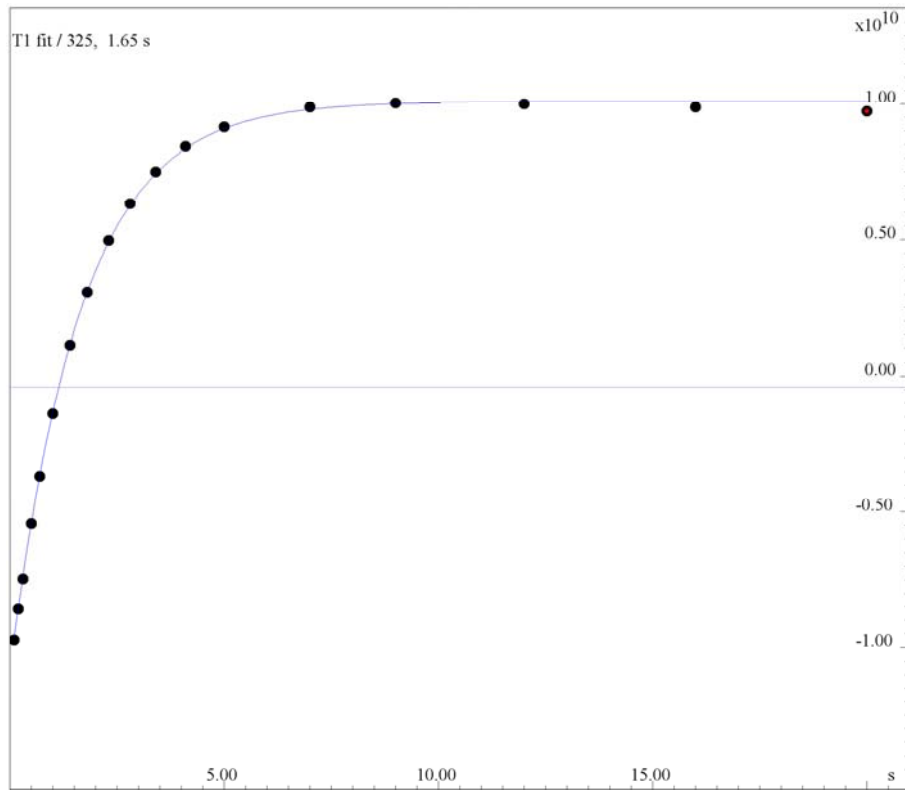**Gb/D1 1:5.76+3 eq H<sub>2</sub>O** $T_1: 1.99 \text{ sec} \pm 0.011$ 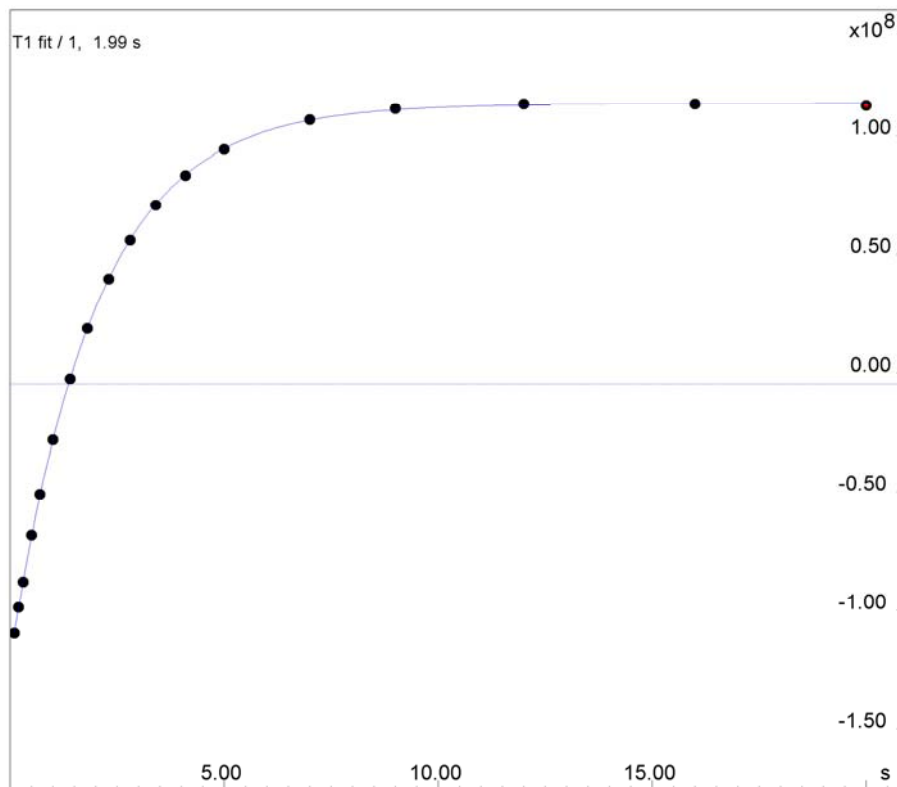

**Gb/D1 1:11.81 + 3 eq H<sub>2</sub>O** $T_1: 2.19 \text{ sec} \pm 4.700\text{e-}06$ 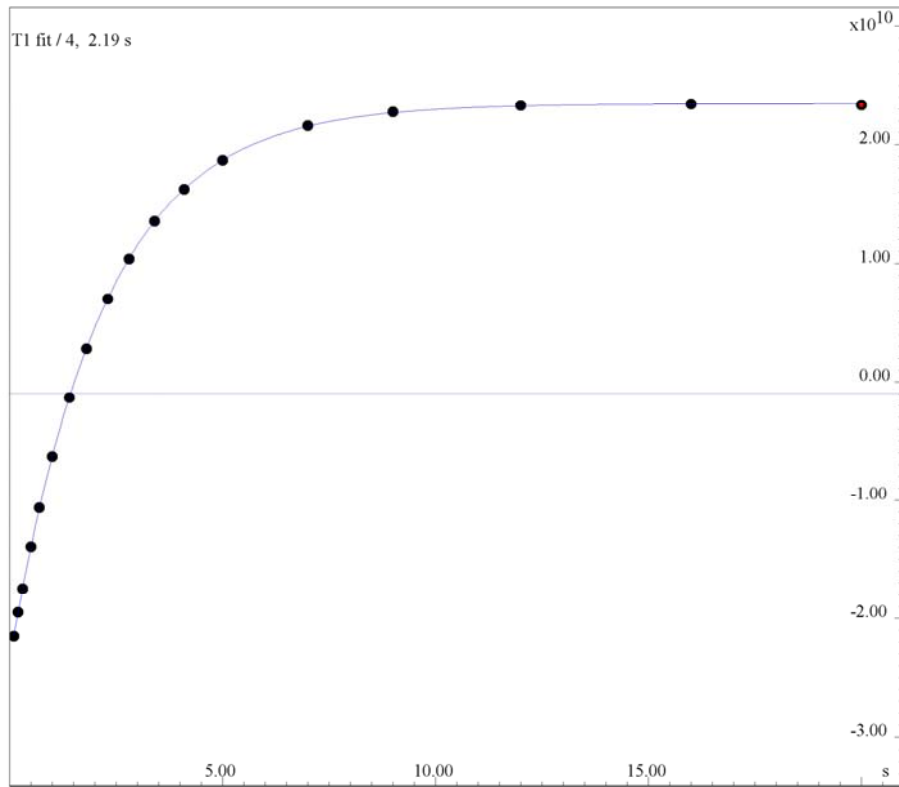**Gb/D1 1:18.99 + 3 eq H<sub>2</sub>O** $T_1: 2.43 \text{ sec} \pm 0.049$ 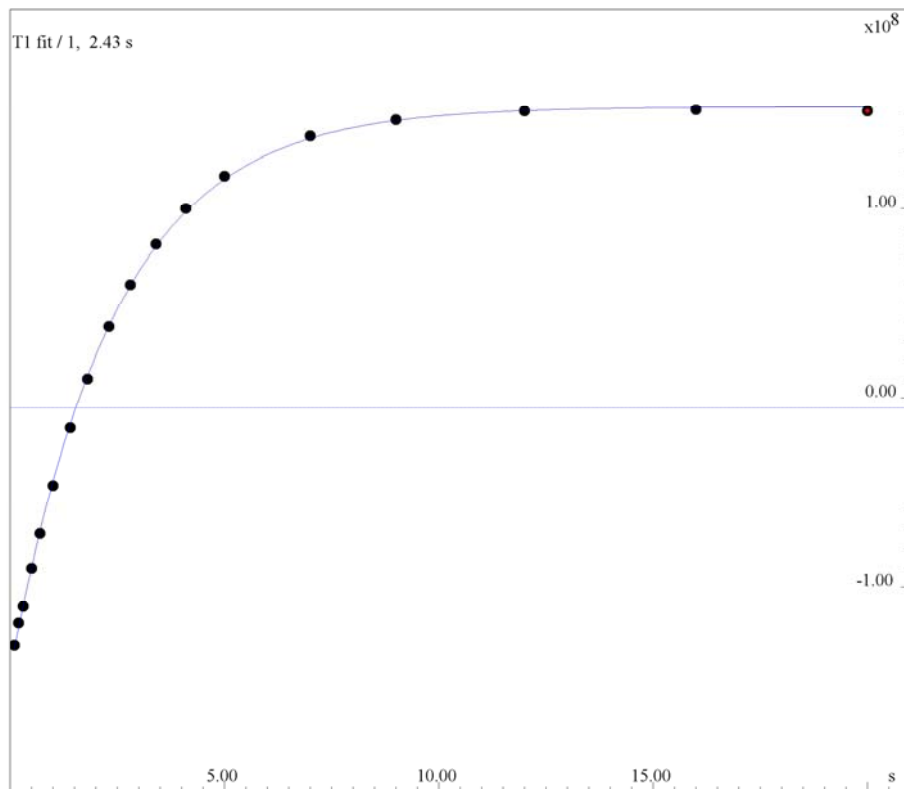

**2.3.  $T_1$  exponential fitting of Gb/D1 mixtures + 6 eq  $H_2O$** **Gb/D1 1:1.52 + 6 eq  $H_2O$**  $T_1$ : 2.44 sec  $\pm$  6.288e-05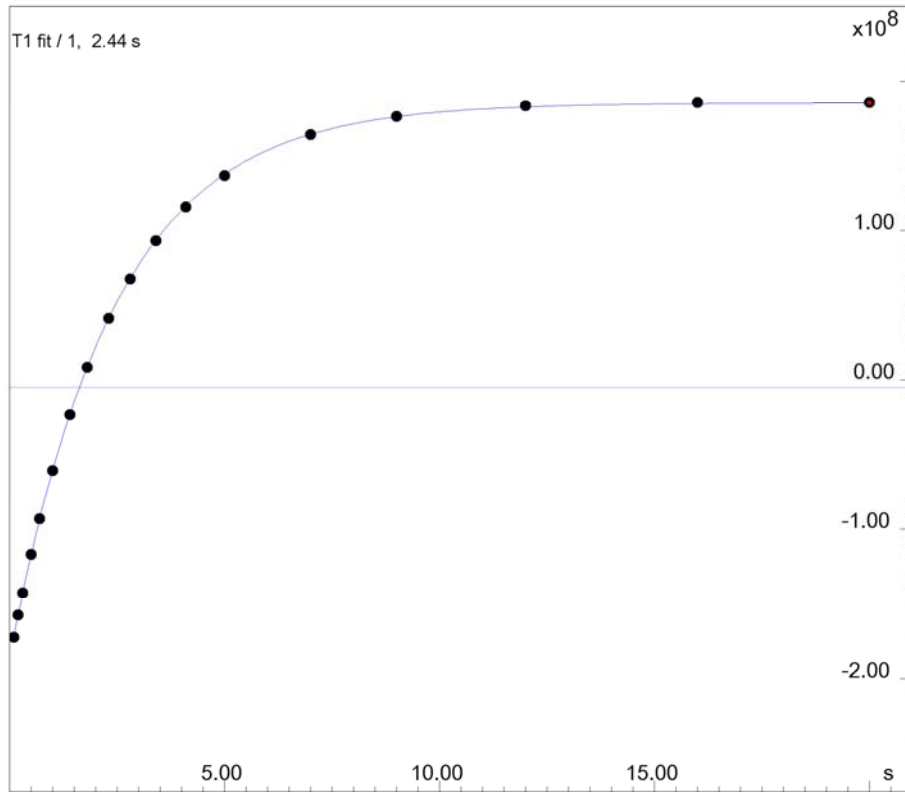**Gb/D1 1:2.02 + 6 eq  $H_2O$**  $T_1$ : 2.43 sec  $\pm$  7.364e-05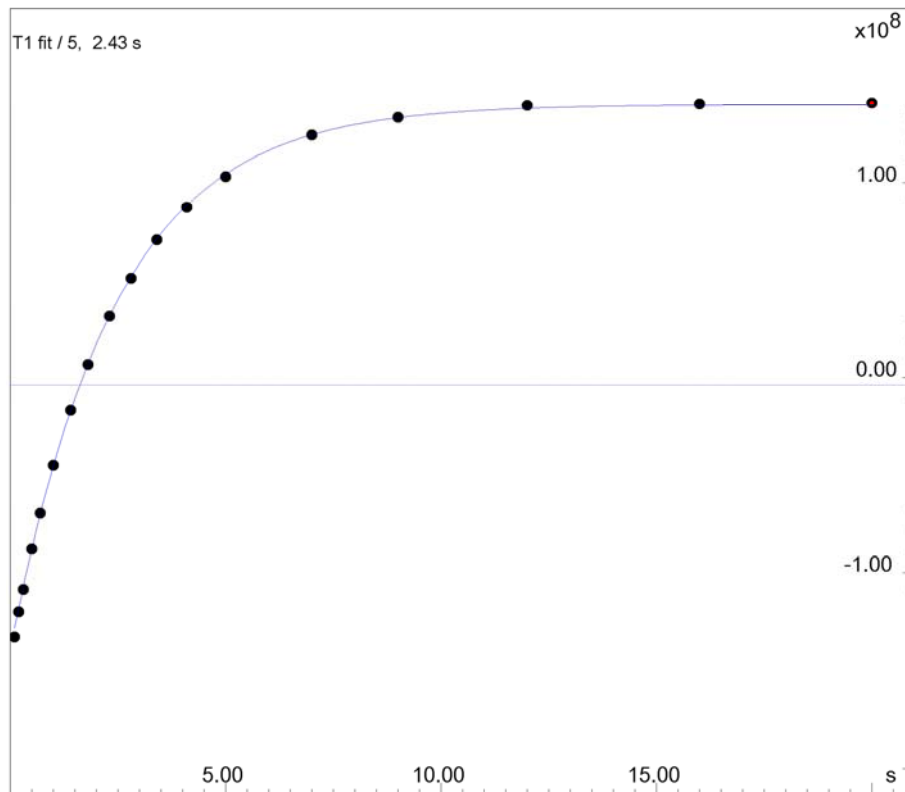

**Gb/D1 1:3.02+6 eq H<sub>2</sub>O** $T_1: 2.27 \text{ sec} \pm 2.115\text{e-}05$ 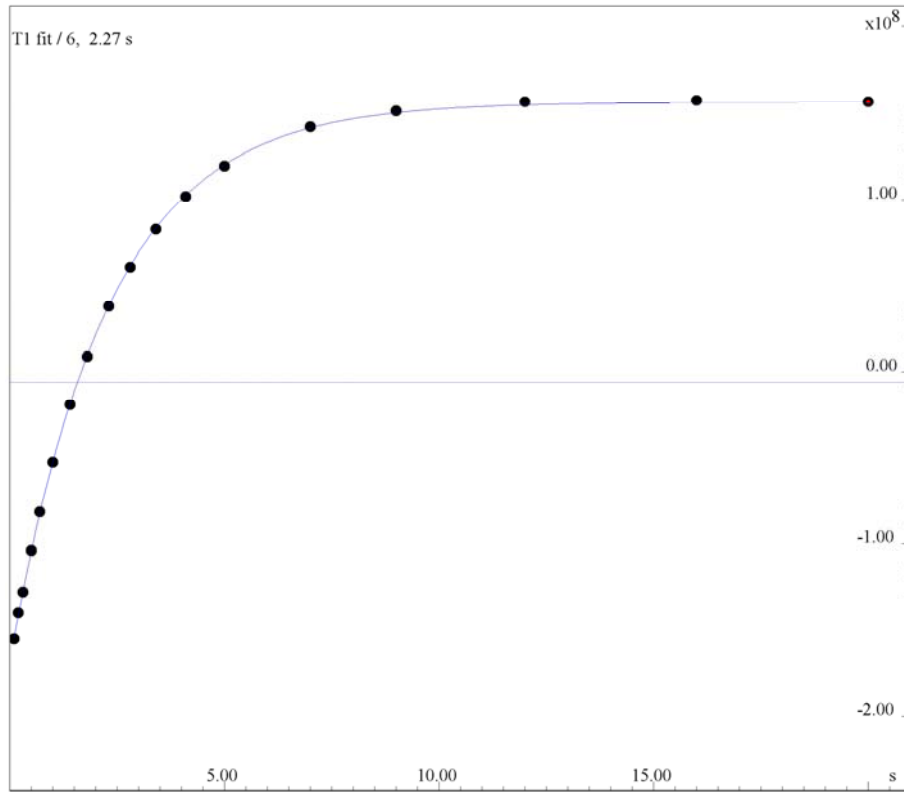**Gb/D1 1:4.10+6 eq H<sub>2</sub>O** $T_1: 2.36 \text{ sec} \pm 0.0001197$ 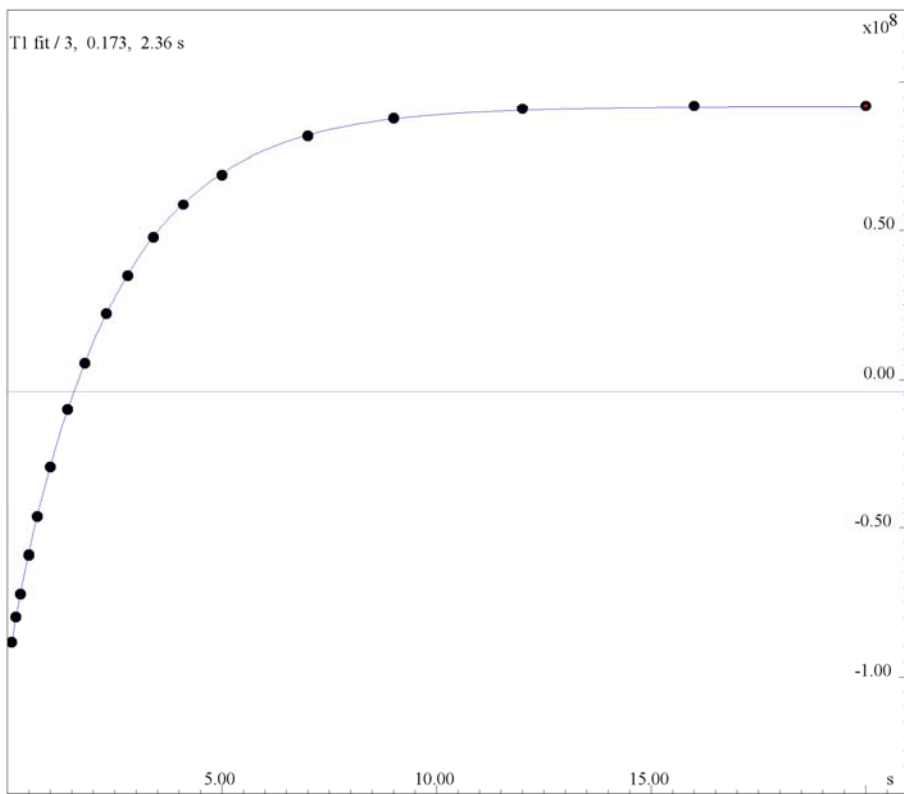

**Gb/D1 1:6.05+6 eq H<sub>2</sub>O** $T_1: 2.39 \text{ sec} \pm 0.0099$ 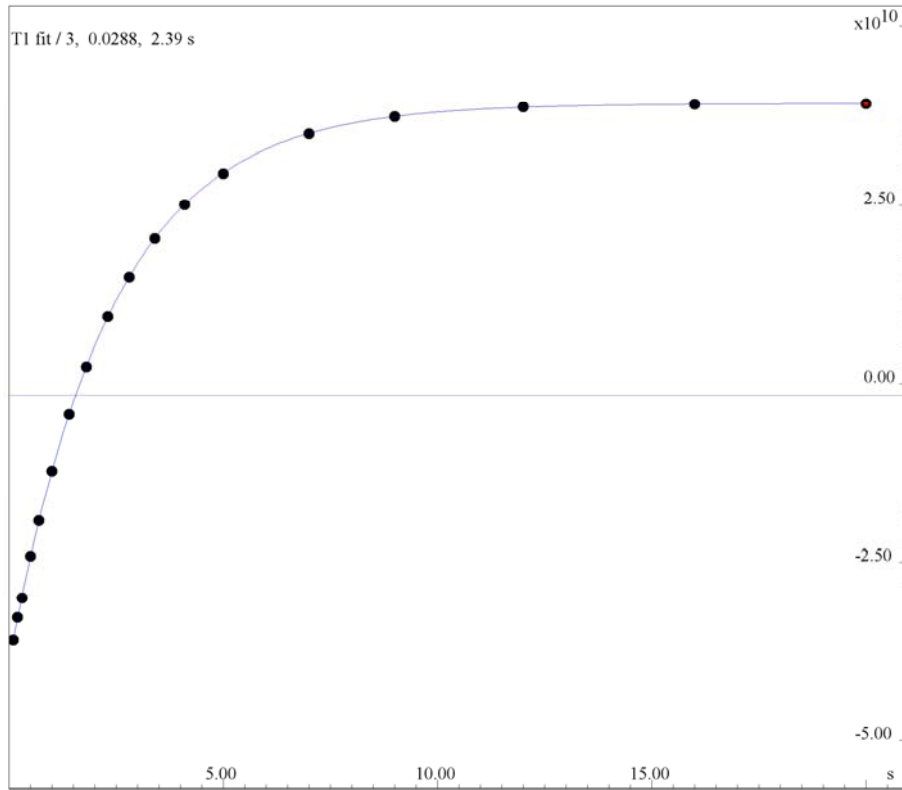**Gb/D1 1:9.11+6 eq H<sub>2</sub>O** $T_1: 2.51 \text{ sec} \pm 0.02683$ 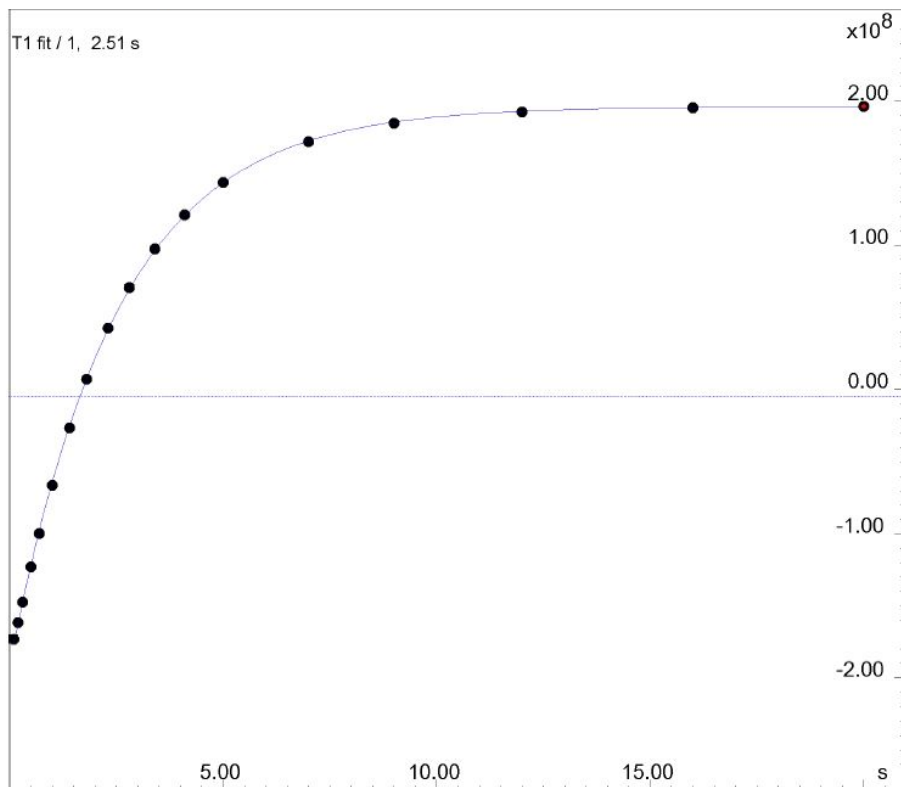

**Gb/D1 1:11.82 + 6 eq H<sub>2</sub>O** $T_1: 2.58 \text{ sec} \pm 0.03752$ 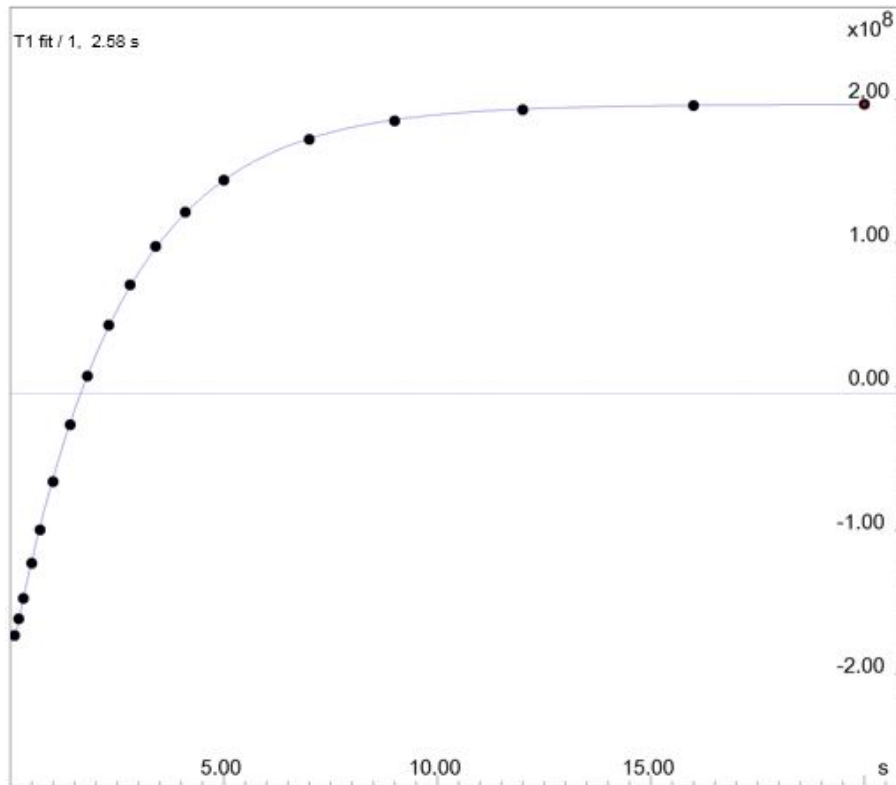**2.4.  $T_1$  exponential fitting of Gb/D2 mixtures****Gb/D2 1:3.66** $T_1: 1.38 \text{ sec} \pm 0.01627$ 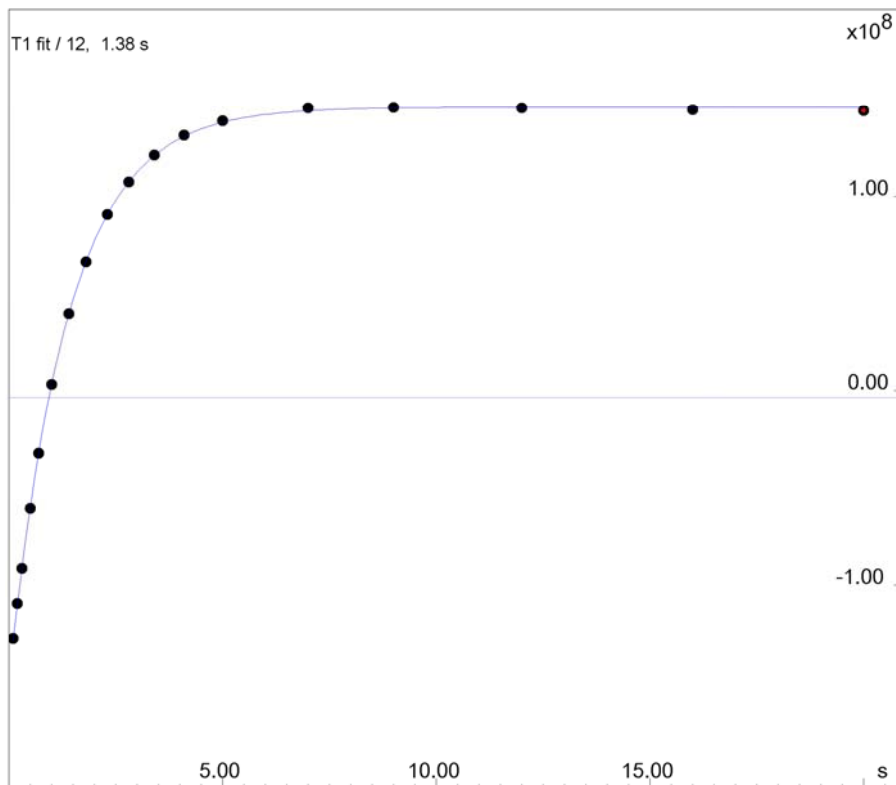

**Gb/D2 1:3.76** $T_1: 1.35 \text{ sec} \pm 0.01837$ 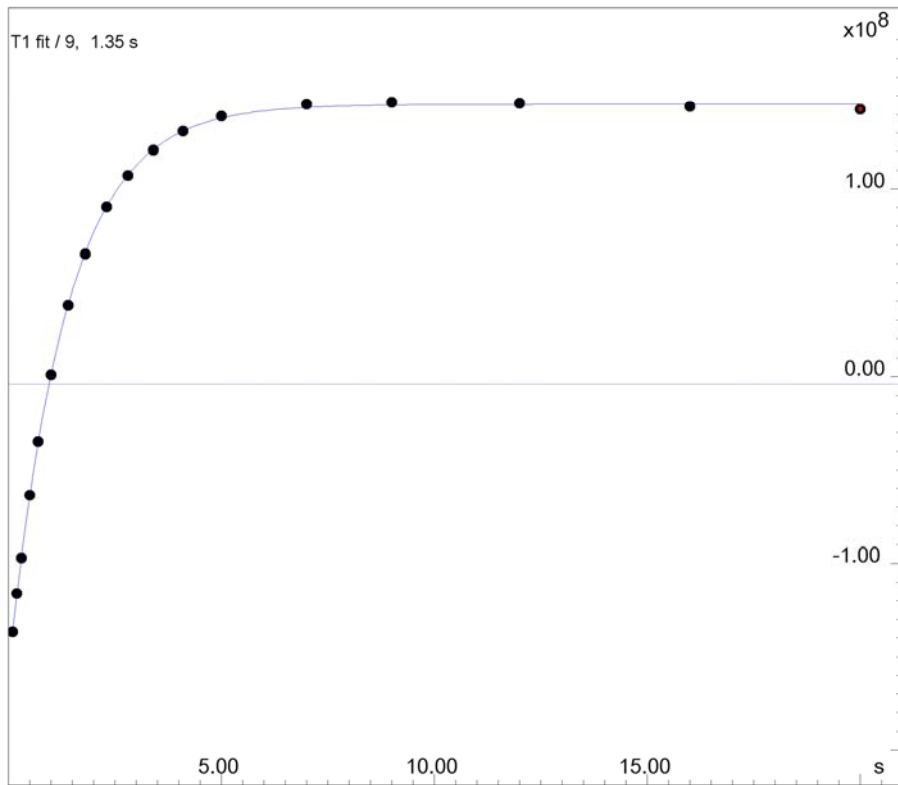**Gb/D2 1:4.21** $T_1: 1.38 \text{ sec} \pm 0.01680$ 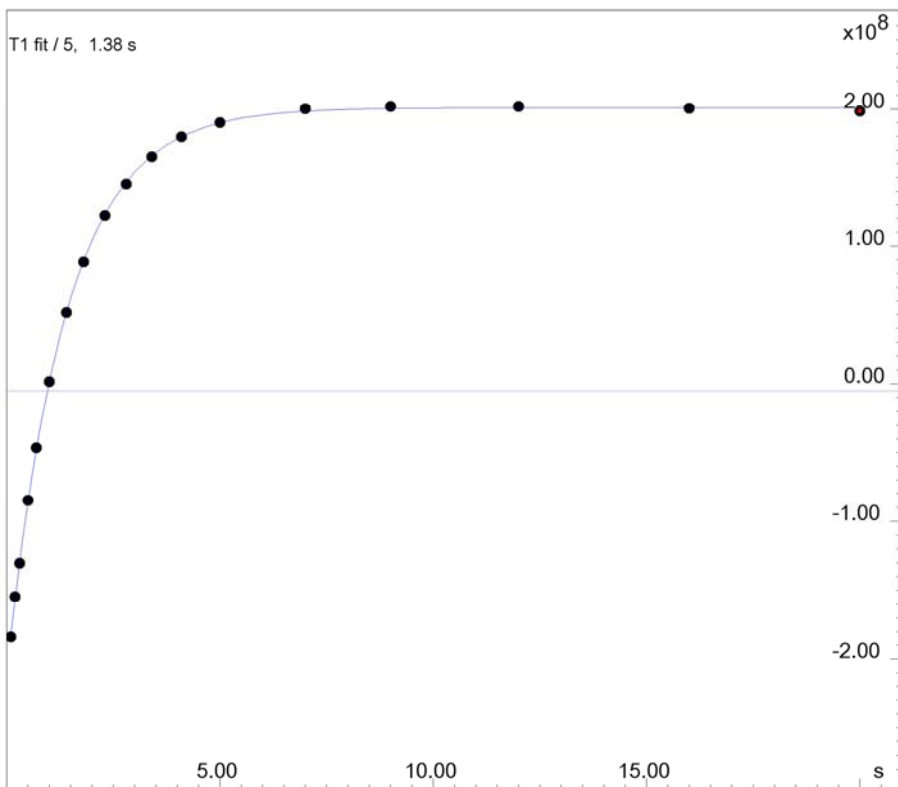

**Gb/D2 1:6.07** $T_1: 1.51 \text{ sec} \pm 0.01527$ 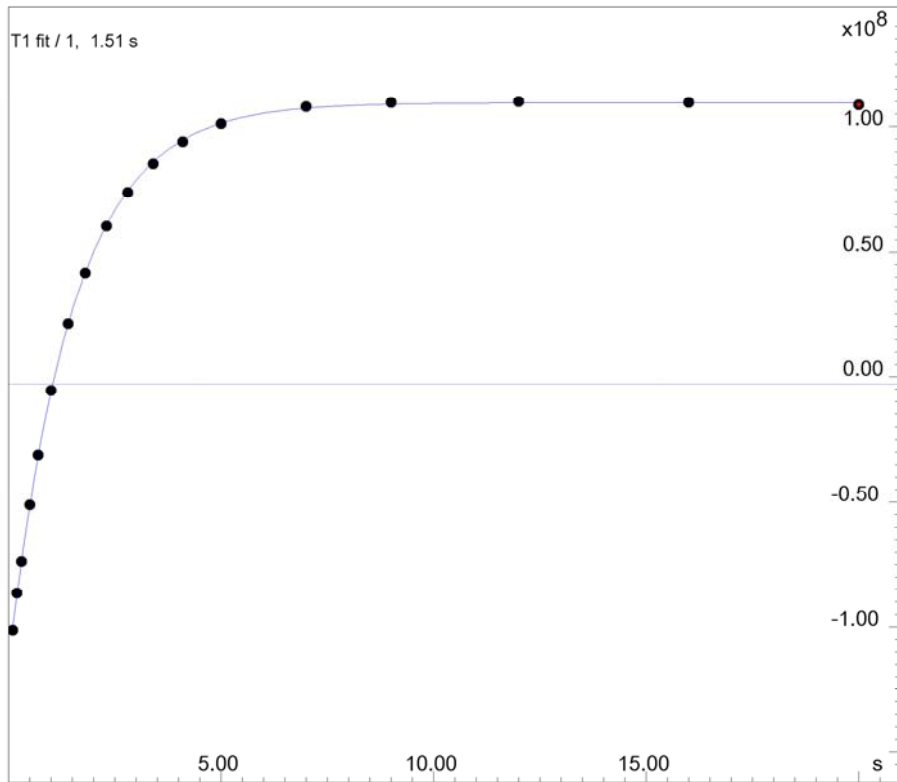**Gb/D2 1:8.91** $T_1: 1.63 \text{ sec} \pm 0.01547$ 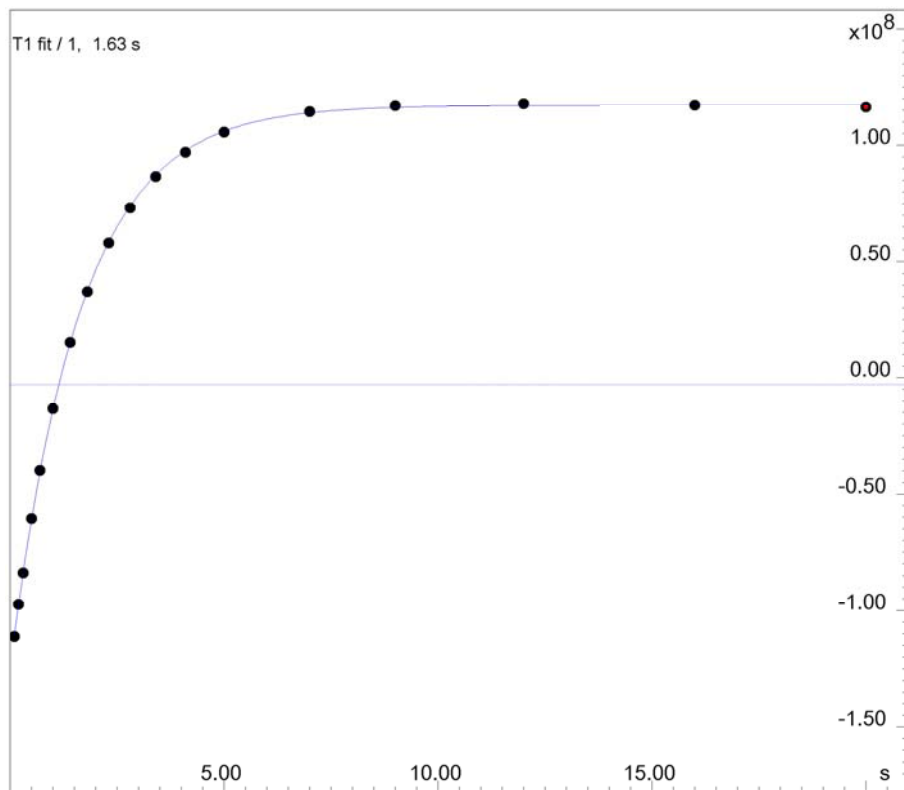



**D2** $T_1: 2.03 \text{ sec} \pm 0.01993$ 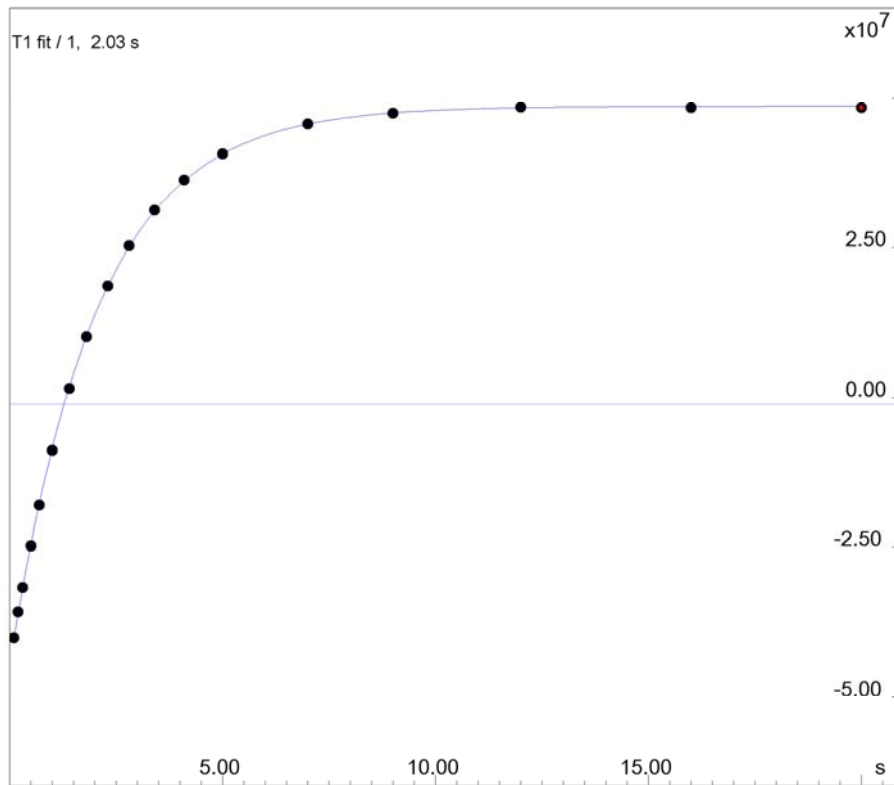**2.5.  $T_1$  exponential fitting of Gb/D3 mixtures****Gb/D3 1:2.86** $T_1: 1.16 \text{ sec} \pm 0.007736$ 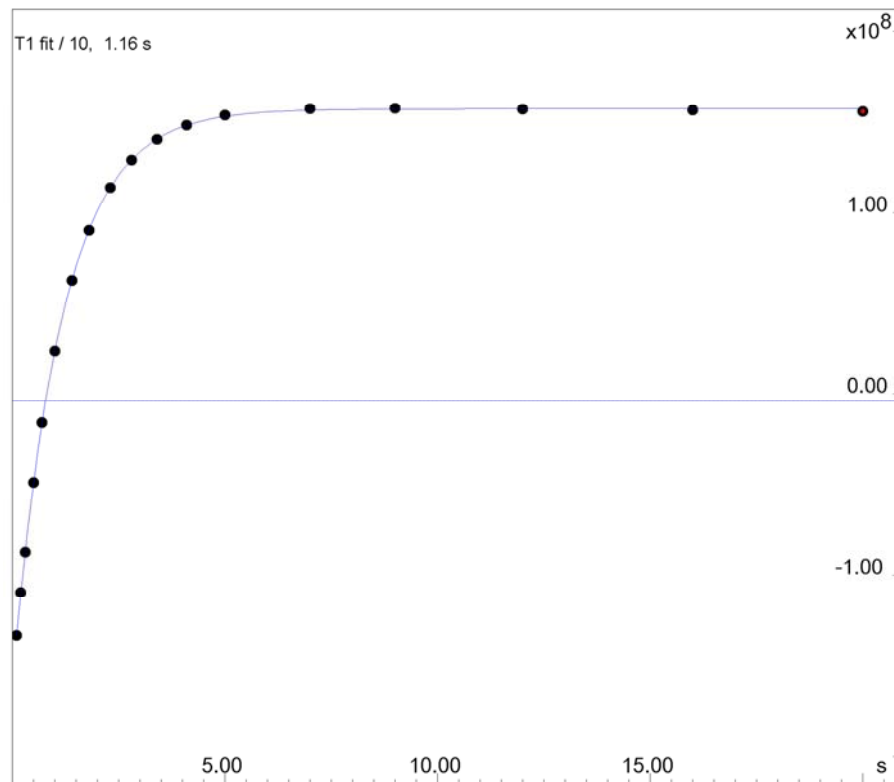

**Gb/D3 1:2.93** $T_1: 1.17 \text{ sec} \pm 0.009845$ 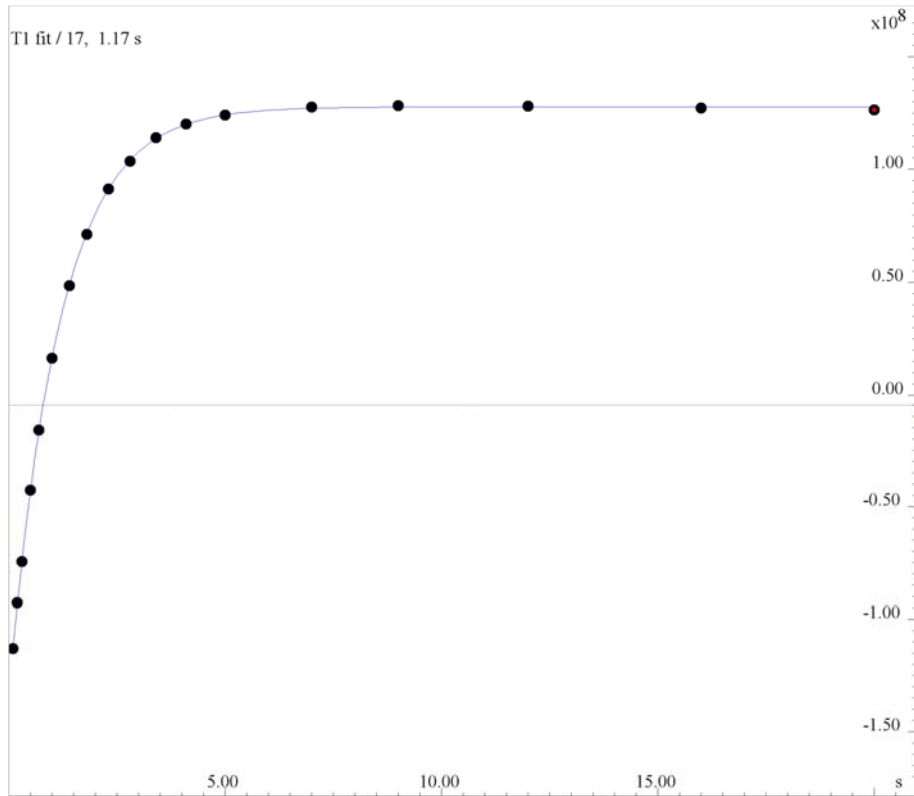**Gb/D3 1:3.10** $T_1: 1.11 \text{ sec} \pm 0.01163$ 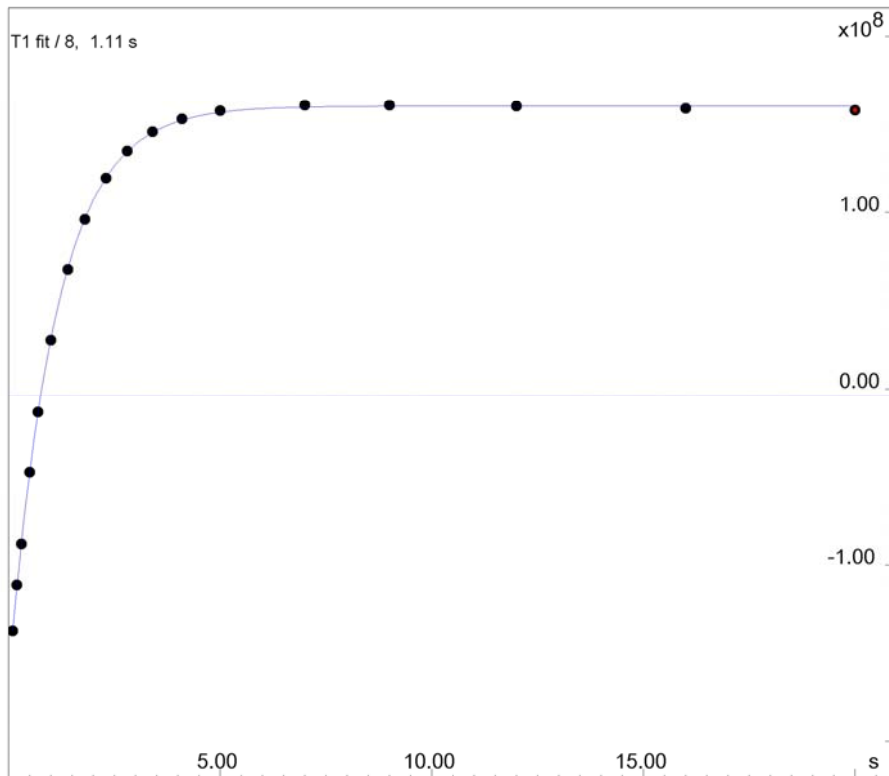

**Gb/D3 1:4.05** $T_1: 1.17 \text{ sec} \pm 0.008527$ 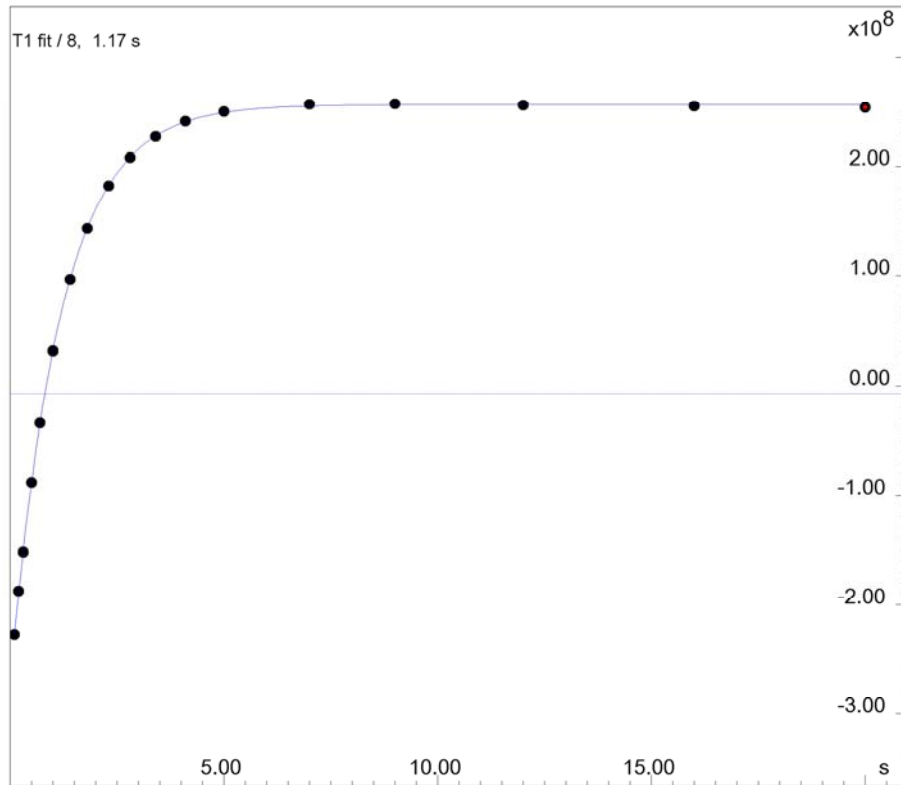**Gb/D3 1:6.32** $T_1: 1.27 \text{ sec} \pm 0.01324$ 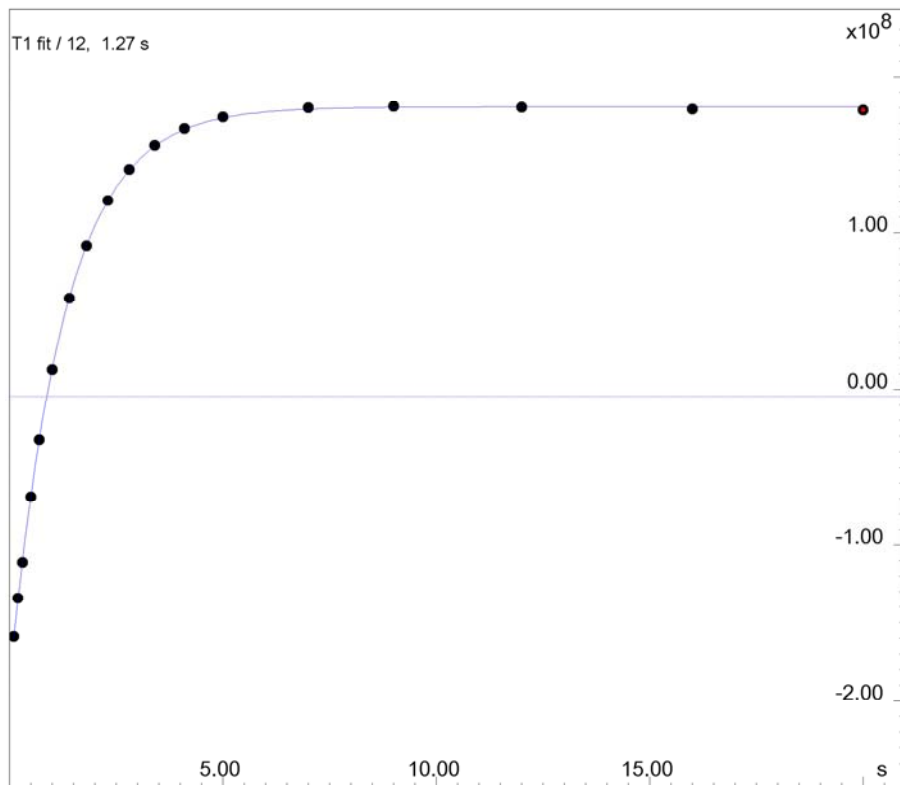

**Gb/D3 1:12.27** $T_1: 1.42 \text{ sec} \pm 0.01281$ 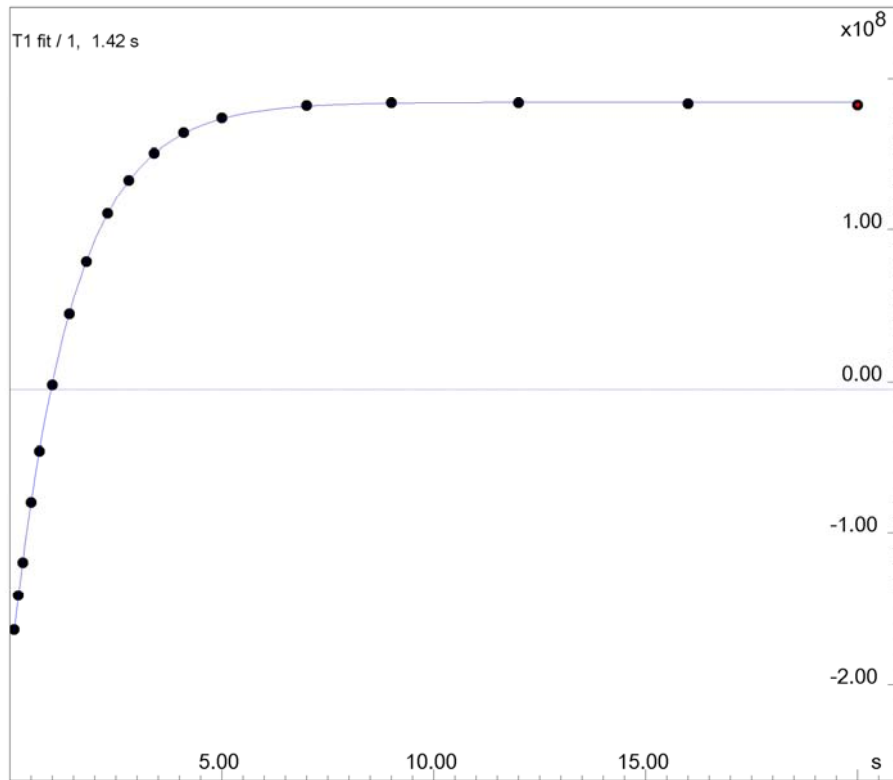**D3** $T_1: 1.52 \text{ sec} \pm 0.007114$ 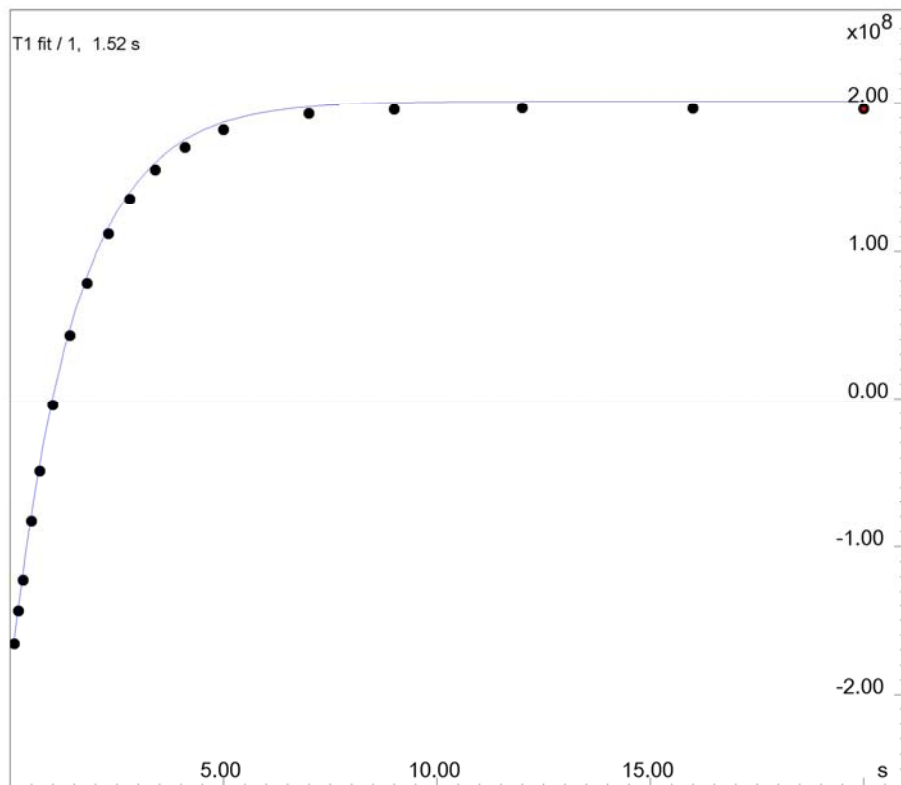

### 3. Copies of $T_1$ exponential fitting by inversion recovery technique of other signals

#### 3.1. $T_1$ exponential fitting of other signals

##### 3.1. $T_1$ exponential fitting of Gb/D1 mixtures

| Mixture      | OH D1 | CH <sub>2</sub> D1 | NMe <sub>3</sub> Gb | CH <sub>2</sub> Gb |
|--------------|-------|--------------------|---------------------|--------------------|
| Gb/D1 1:2.44 | 1.42  | 1.02               | 0.561               | 0.537              |
| Gb/D1 1:2.73 | 1.34  | 1.04               | 0.58                | 0.555              |
| Gb/D1 1:2.85 | 1.26  | 1.03               | 0.572               | 0.548              |
| Gb/D1 1:3.18 | 1.42  | 0.583              | 0.61                | 0.585              |
| Gb/D1 1:3.91 | 1.55  | 0.633              | 0.655               | 0.62               |
| Gb/D1 1:4.85 | 1.69  | 0.84               | 0.718               | 0.701              |
| Gb/D1 1:8.65 | 1.96  | 0.805              | 0.849               | 0.799              |
| D1           | 2.63  | 1.74               |                     |                    |

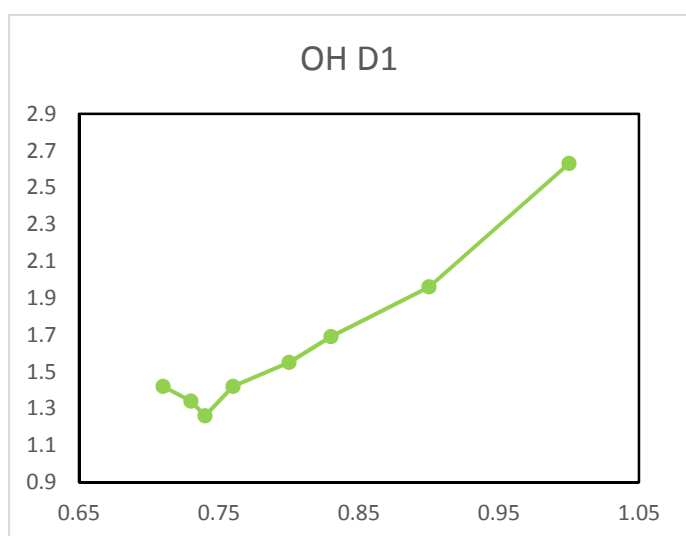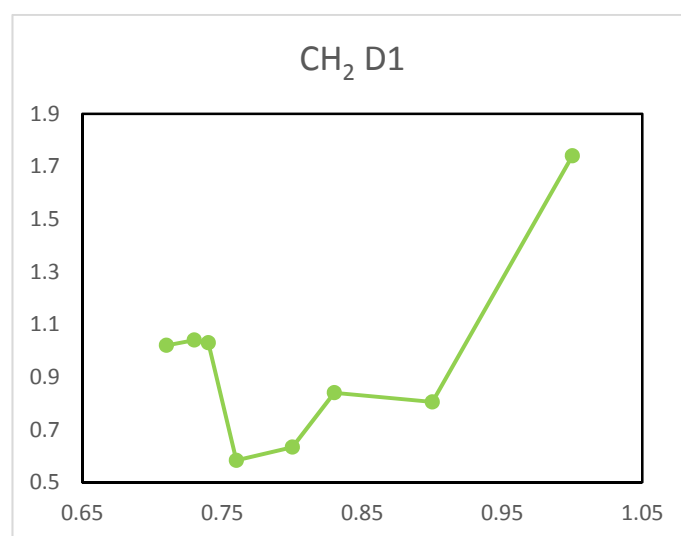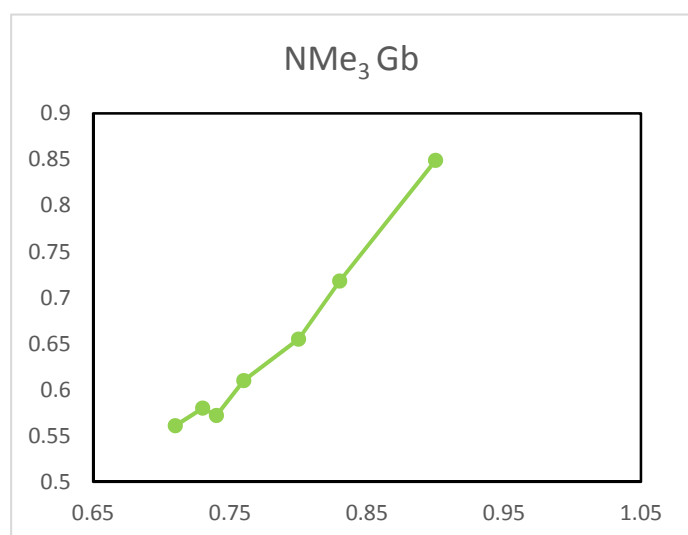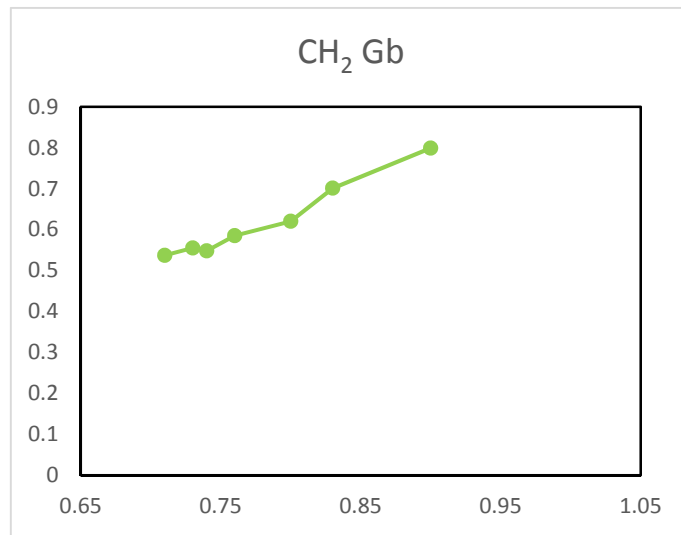

3.2.  $T_1$  exponential fitting of Gb/D1 mixtures + 3 eq H<sub>2</sub>O

| Mixture       | OH D1 | CH <sub>2</sub> D1 | NMe <sub>3</sub> Gb | CH <sub>2</sub> Gb |
|---------------|-------|--------------------|---------------------|--------------------|
| Gb/D1 1:2.01  | 1.89  | 1                  | 1.74                | 0.97               |
| Gb/D1 1:2.49  | 1.72  | 0.94               | 2.08                | 1.76               |
| Gb/D1 1:2.85  | 1.59  | 1.68               | 1.66                | 0.93               |
| Gb/D1 1:3.11  | 1.65  | 0.987              | 0.98                | 0.988              |
| Gb/D1 1:5.76  | 1.99  | 0.836              | 0.95                | 0.919              |
| Gb/D1 1:11.81 | 2.19  | 1.16               | 0.997               | 0.928              |
| Gb/D1 1:18.99 | 2.43  | 1.06               | 2.44                | 1.16               |
| D1            | 2.63  | 1.74               |                     |                    |

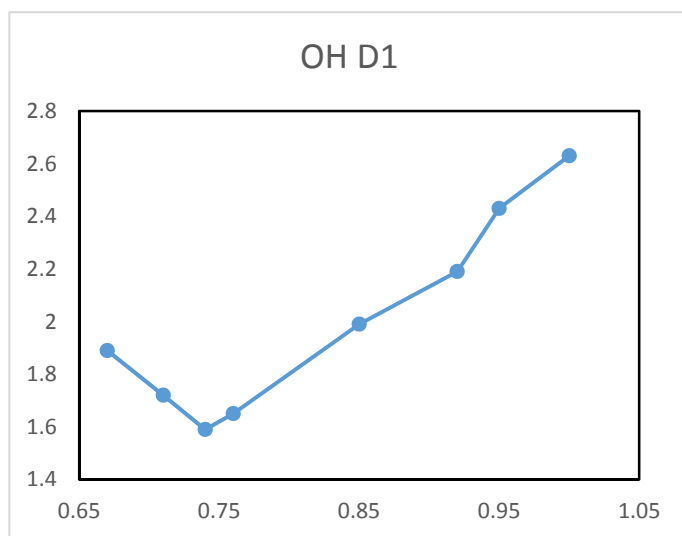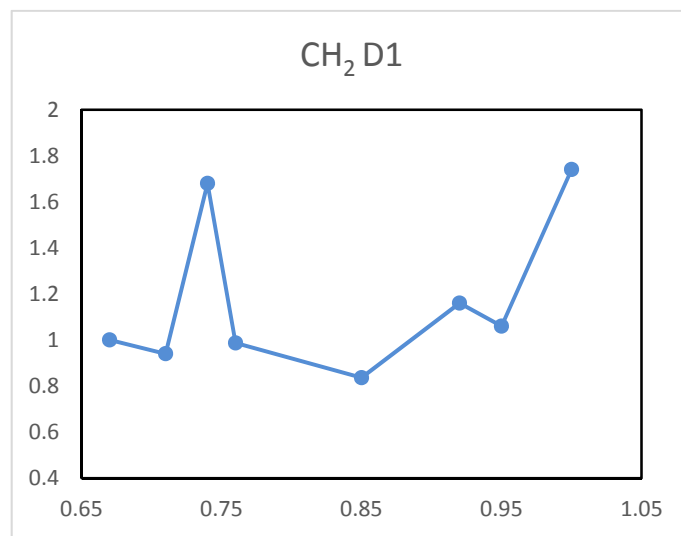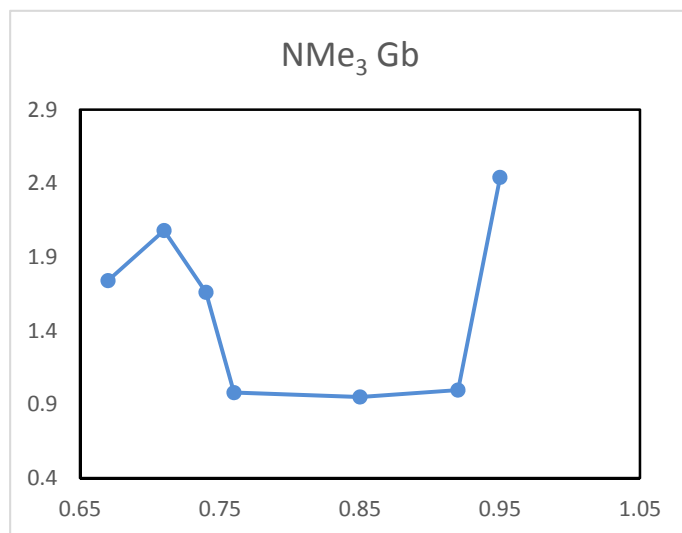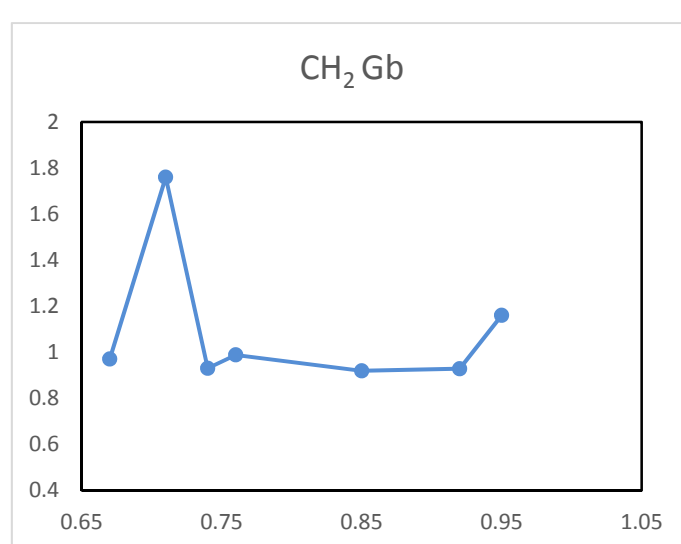

3.3.  $T_1$  exponential fitting of Gb/D1 mixtures + 6 eq H<sub>2</sub>O

| Mixture       | OH D1 | CH <sub>2</sub> D1 | NMe <sub>3</sub> Gb | CH <sub>2</sub> Gb |
|---------------|-------|--------------------|---------------------|--------------------|
| Gb/D1 1:1.52  | 2.49  | 2.45               | 1.36                | 1.51               |
| Gb/D1 1:2.02  | 2.43  | 2.36               | 1.47                | 1.29               |
| Gb/D1 1:3.02  | 2.27  | 2.02               | 1.35                | 1.35               |
| Gb/D1 1:4.10  | 2.36  | 1.26               | 1.37                | 2.02               |
| Gb/D1 1:6.05  | 2.39  | 1.28               | 1.28                | 2.2                |
| Gb/D1 1:9.11  | 2.51  | 1.13               | 1.14                | 1.24               |
| Gb/D1 1:11.82 | 2.58  | *                  | 2.51                | 1.17               |
| D1            | 2.63  | 1.74               |                     |                    |

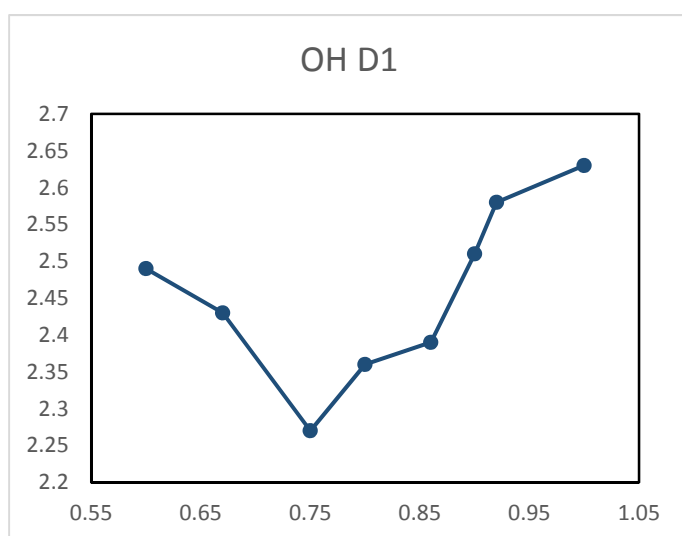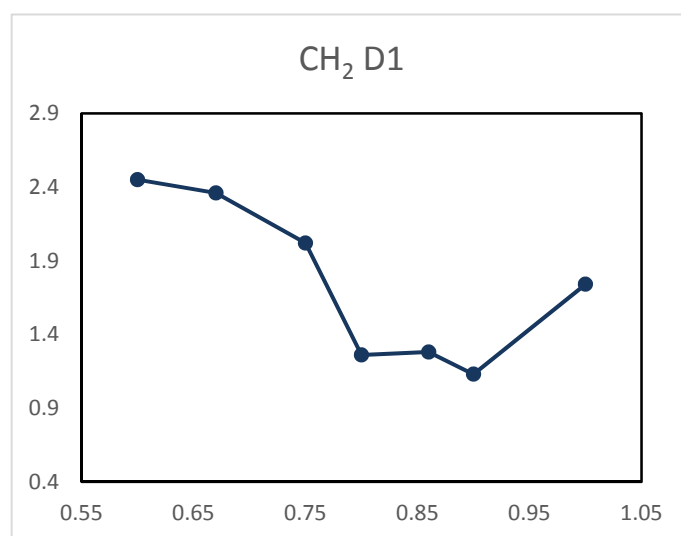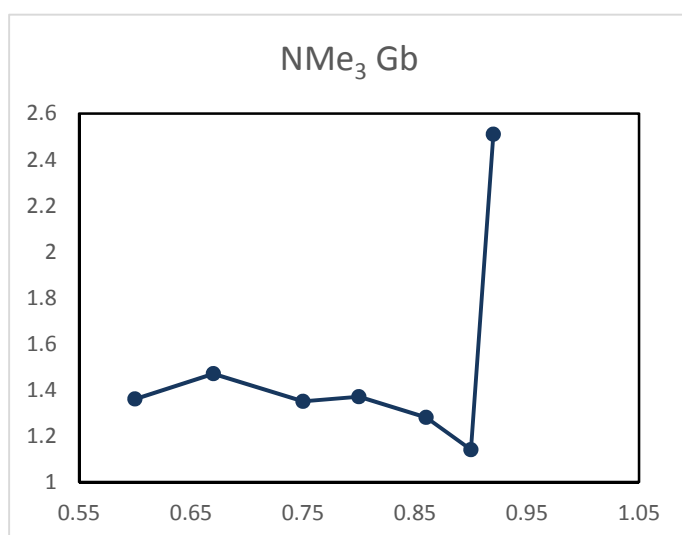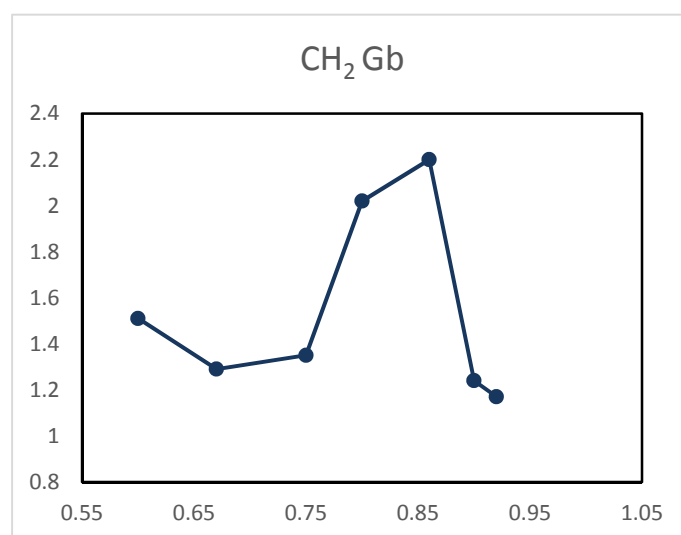

\* error

3.4.  $T_1$  exponential fitting of Gb/D2 mixtures

| Mixture      | OH D2 | $\underline{\text{CH}_2\text{-O-CH}_2}$ D2 | $\underline{\text{CH}_2\text{-OH}}$ D2 | NMe <sub>3</sub> Gb | CH <sub>2</sub> Gb |
|--------------|-------|--------------------------------------------|----------------------------------------|---------------------|--------------------|
| Gb/D2 1:3.63 | 1.4   | 0.9                                        | 0.69                                   | 0.918               | 0.534              |
| Gb/D2 1:3.66 | 1.38  | 0.929                                      | 0.741                                  | 0.929               | 0.528              |
| Gb/D2 1:3.76 | 1.35  | 0.933                                      | 0.57                                   | 0.568               | 1.35               |
| Gb/D2 1:3.80 | 1.53  | 0.602                                      | 0.772                                  | 1                   | 0.564              |
| Gb/D2 1:4.21 | 1.38  | 1.38                                       | 0.731                                  | 0.642               | 0.537              |
| Gb/D2 1:6.07 | 1.5   | 1.06                                       | 0.809                                  | 0.669               | 1.13               |
| Gb/D2 1:8.91 | 1.63  | 1.1                                        | 0.891                                  | *                   | 0.575              |
| D2           | 2.03  | *                                          | 1.02                                   |                     |                    |

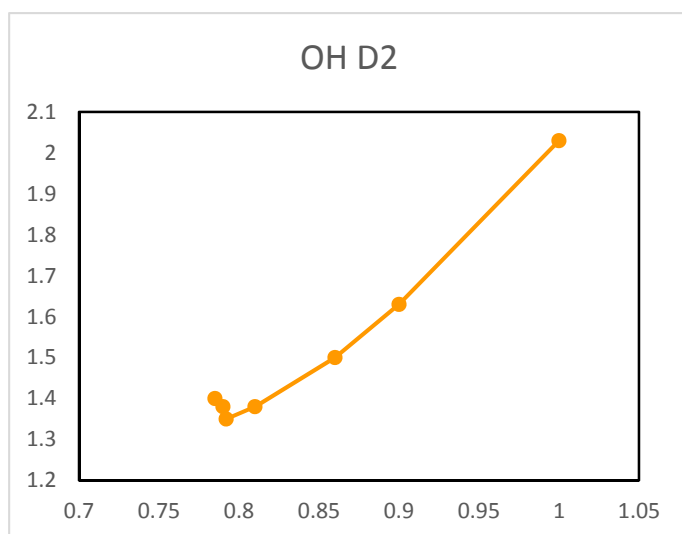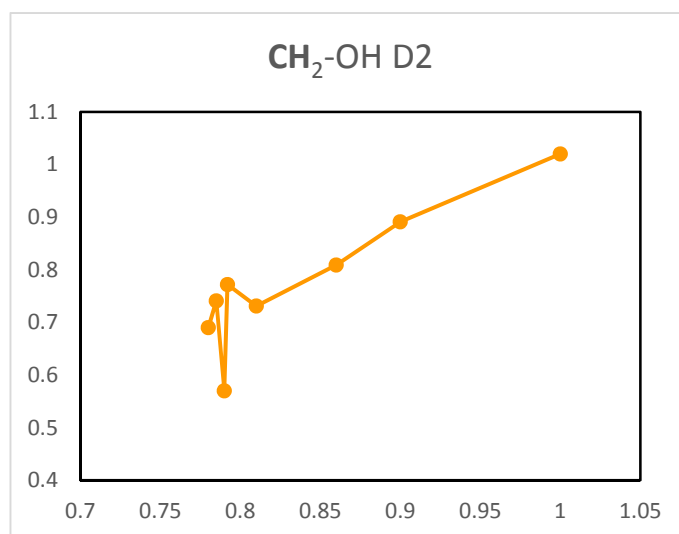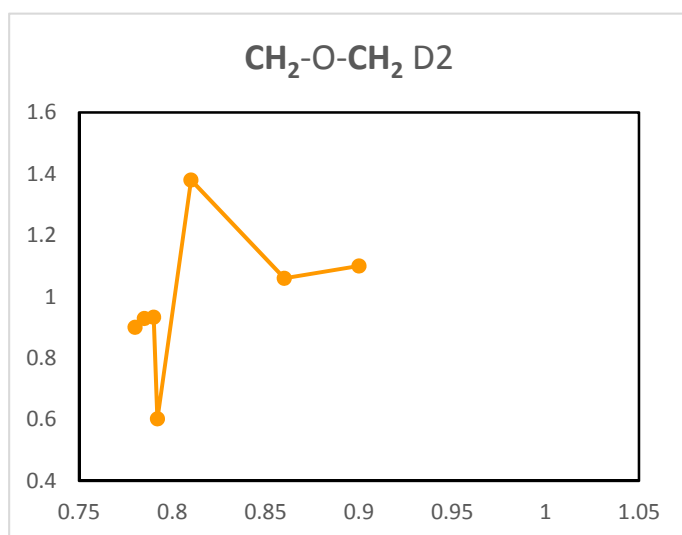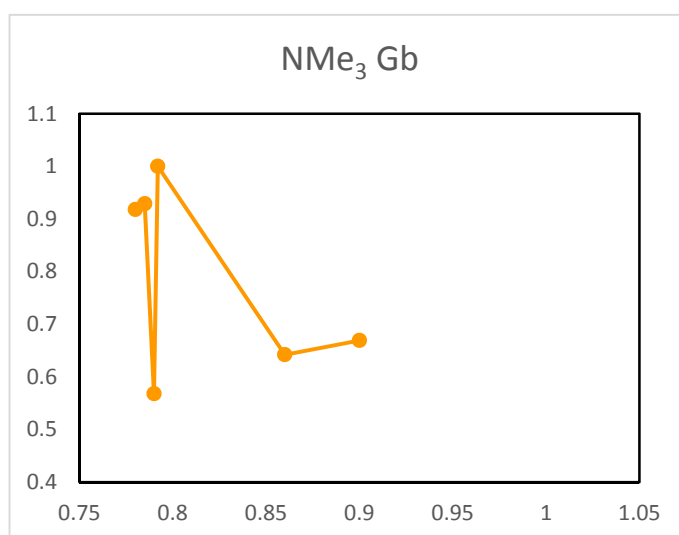



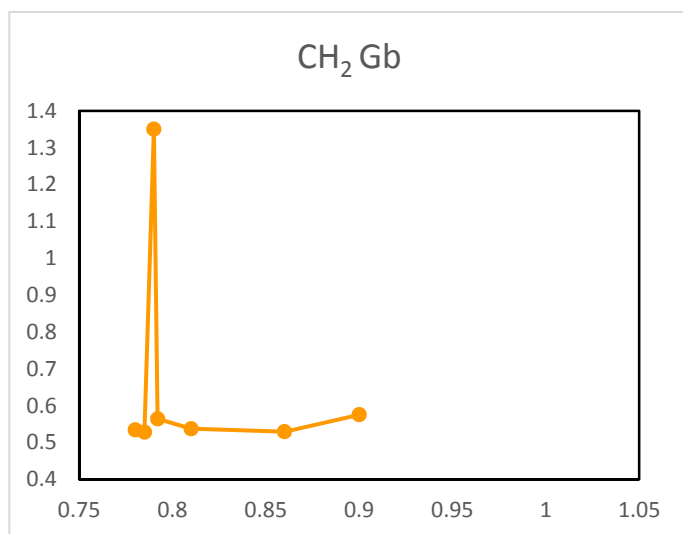

\*error

3.5.  $T_1$  exponential fitting of Gb/D3 mixtures

| Mixture       | OH D3 | CH <sub>2</sub> -OH D3 | CH <sub>2</sub> -CH <sub>2</sub> -CH <sub>2</sub> D3 | NMe <sub>3</sub> Gb | CH <sub>2</sub> Gb |
|---------------|-------|------------------------|------------------------------------------------------|---------------------|--------------------|
| Gb/D3 1:2.86  | 1.16  | 0.988                  | 0.981                                                | 0.978               | 1                  |
| Gb/D3 1:2.93  | 1.17  | 0.994                  | 1.01                                                 | 0.982               | 0.472              |
| Gb/D3 1:3.10  | 1.11  | 0.95                   | 0.95                                                 | 0.942               | 0.972              |
| Gb/D3 1:4.05  | 1.17  | 1                      | 1                                                    | 1.04                | 0.506              |
| Gb/D3 1:6.32  | 1.27  | 1.09                   | 1.09                                                 | 1.27                | 1.08               |
| Gb/D3 1:12.27 | 1.42  | 1.21                   | 1.18                                                 | 1.21                | 1.13               |
| D3            | 1.52  | 1.27                   | 1.28                                                 |                     |                    |

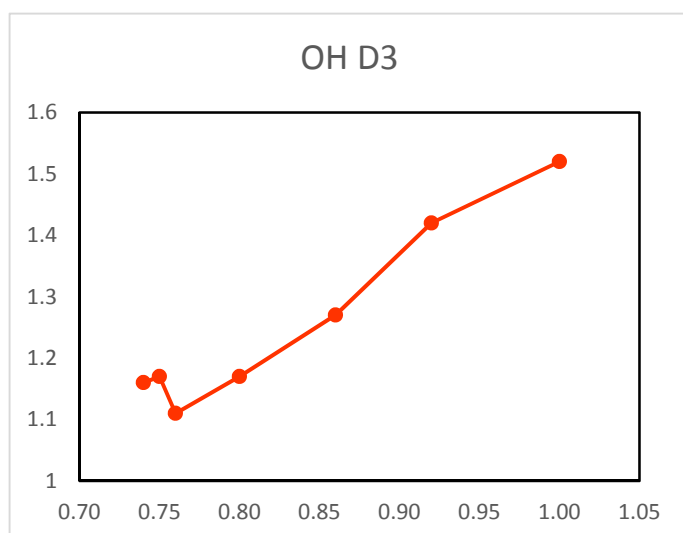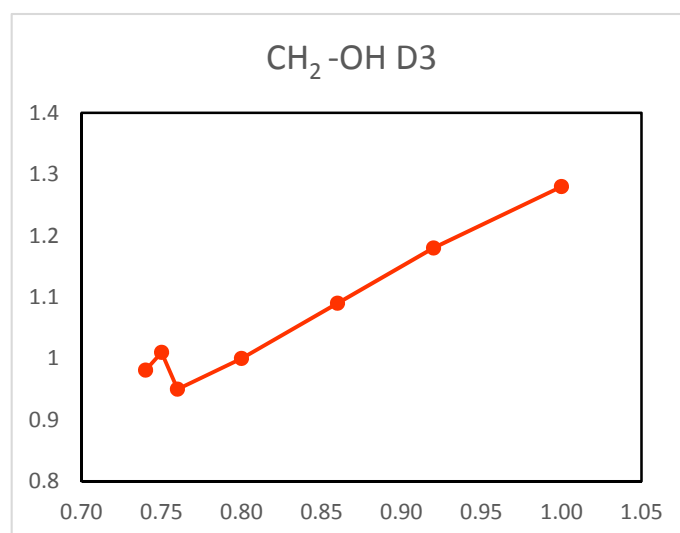

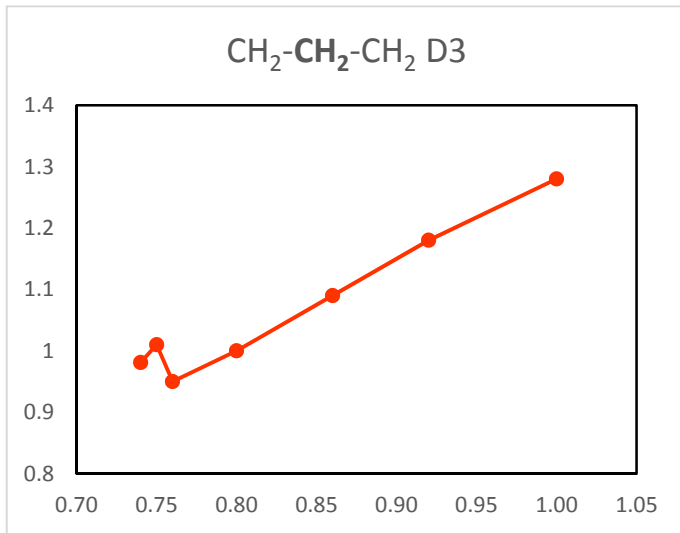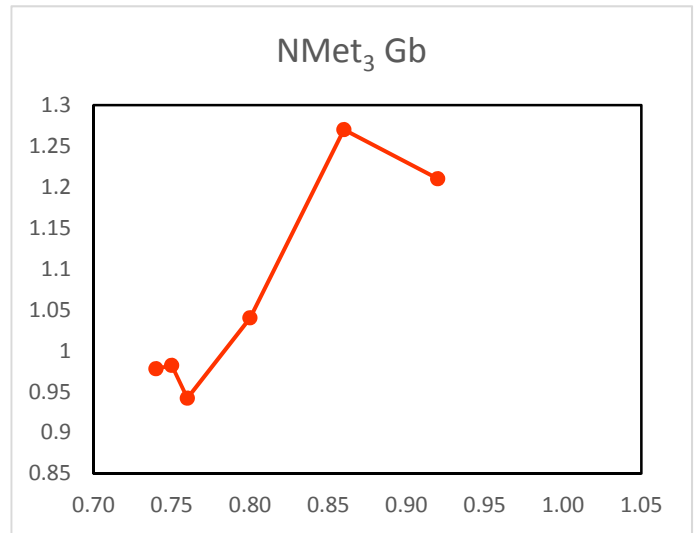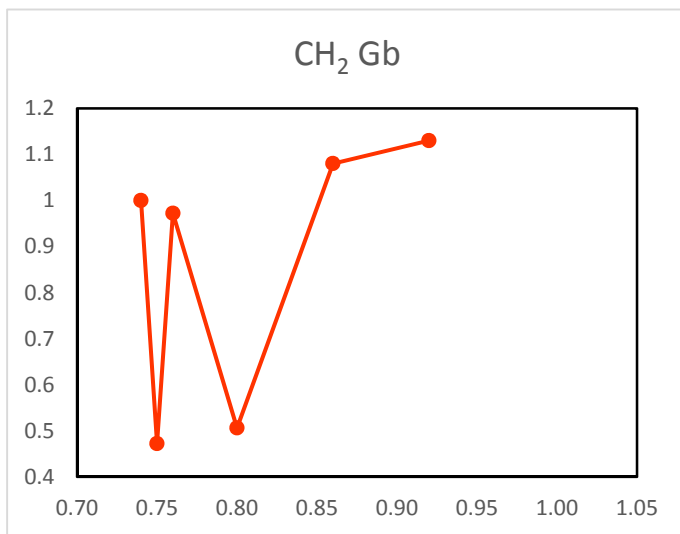

4. Copies of DSC plotting of Gb/D1 mixtures

Gb/D1 1:2.23

XD= 0.69

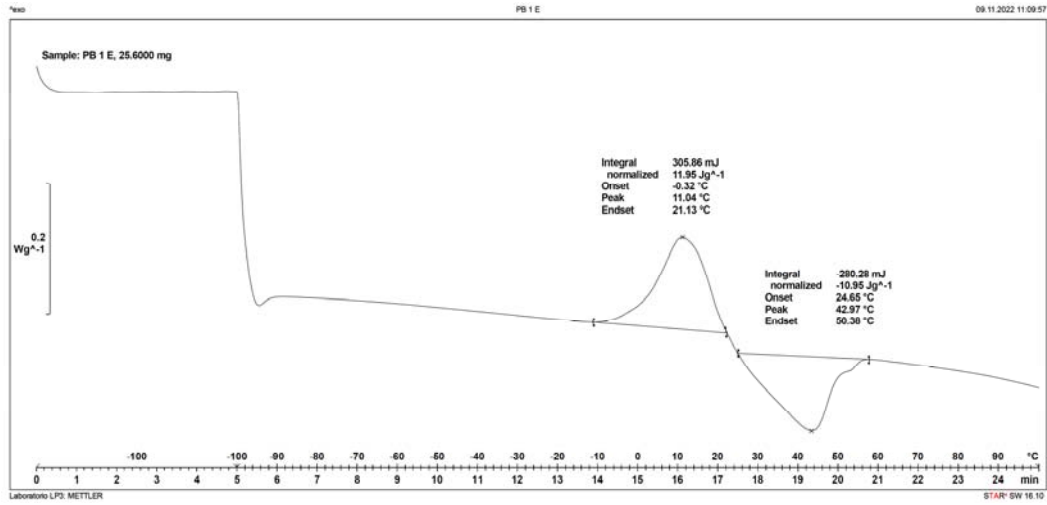

Gb/D1 1:2.85

XD= 0.74

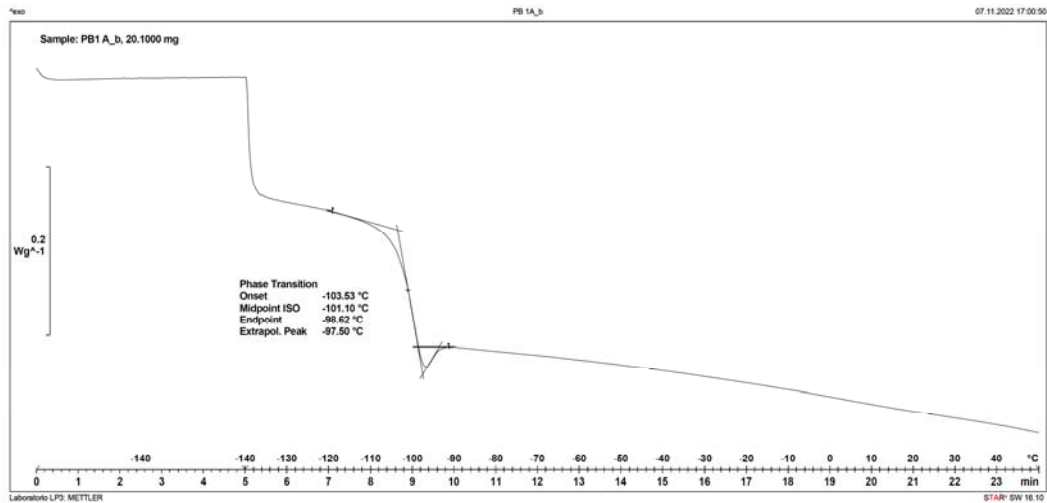

Gb/D1 1:4.97

XD= 0.83

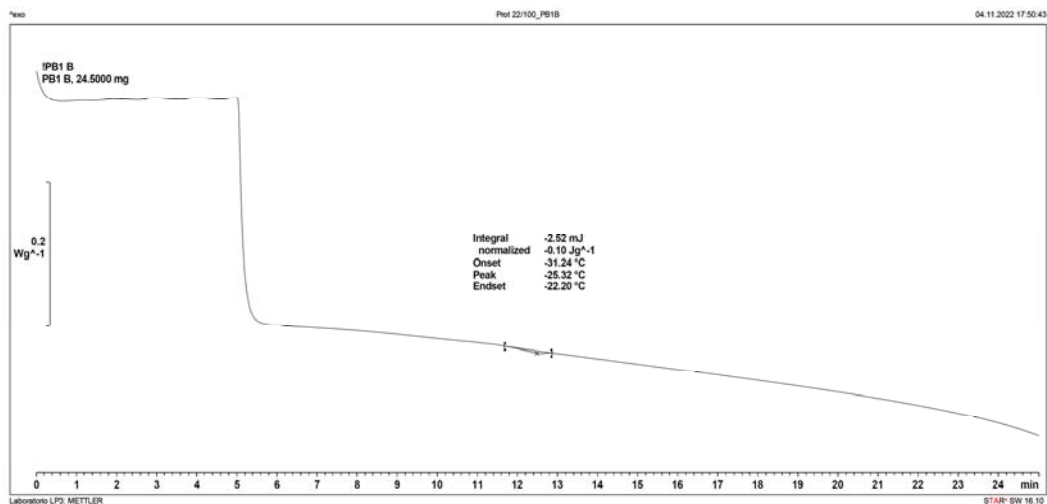

Gb/D1 1:8  
XD= 0.88

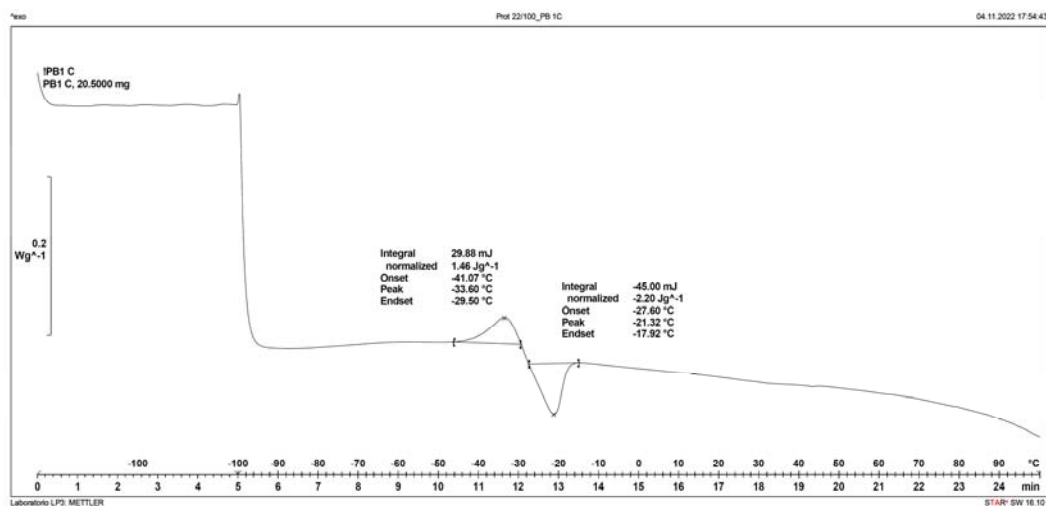

D1  
XD= 1

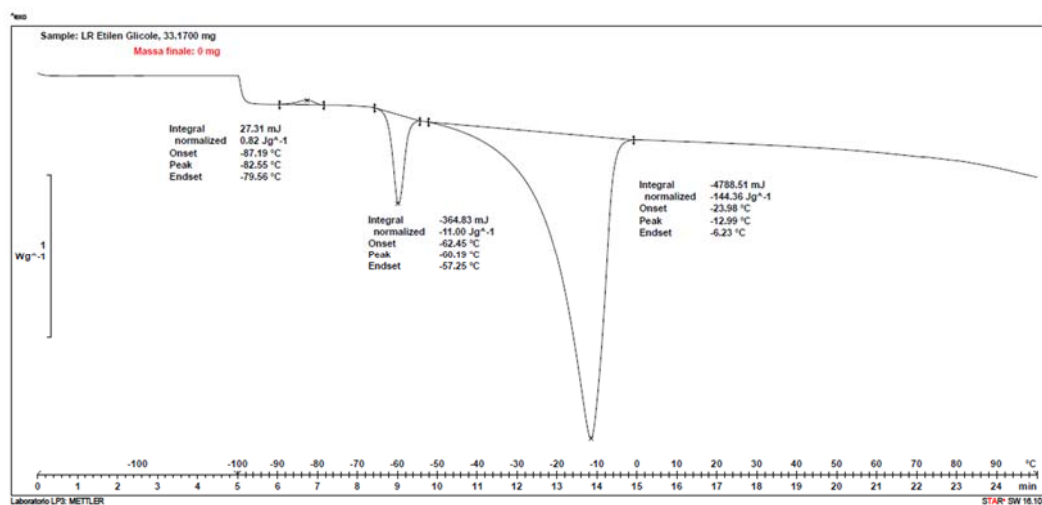

Supplement: d2ra08082f1.pdf [file d2ra08082f1.pdf]
